# Supplementary material for: miRVIT: A Novel miRNA Database and Its Application to Uncover Vitis Responses to Flavescence dorée Infection
Source: Front Plant Sci. 2018 Jul 17;9:1034. doi: 10.3389/fpls.2018.01034 (PMC6057443; doi:10.3389/fpls.2018.01034)
Supplement: Supplementary file 2 [file Table_2.XLSX]

## Sheet: Table S2
Table S2. Table extracted from miRVIT database containing all novel miRNAs detected in Vitis spp. in 18 works. Each novel miRNA was re-named using a code ‘vvi_miC’ followed by the indications ‘5p’ or ‘3p’ according to its location in the precursor. The sequences of miRNA and miRNA* (when available) were re-positioned on the last version of grape genome (PN40024, http://genomes.cribi.unipd.it/grap…
Name	Precursors	miRNA	Location miRNA	Length	Name*	miRNA*	Location miRNA*	Length	Notes	Carra et al., 2009	Pantaleo et al., 2010	Wang et al., 2011	Wang et al., 2012	Alabi et al., 2012	Singh et al., 2012	Wang et al., 2014	Han et al., 2014	Sun et al., 2015	Belli Kullan et al., 2015	Pantaleo et al., 2016	Paim Pinto et al., 2016	Han et al., 2016	Pagliarani et al., 2017	Bester et al., 2017a	Bester et al., 2017b	Zhao et al., 2017	Snyman et al., 2017
										V. vinifera cv Nebbiolo. Berries at different developmental stages.	V. vinifera cv Pinot noir ENTAV115. Leaves, inflorescences, tendrils and berries.	V. vinifera × V. labrusca cv Summer Black. Young and mature leaves, stems, tendrils, inflorescences, flowers, young and large berries.	Vitis amurensis. Leaves, stem, tendrils, inflorescences, flowers, and developing fruits (15, 30 and 45 days after full blooming).	V. vinifera cv Merlot. Leaves from GLRaV-3-free and infected plants.	Chardonel': hybrid SeyvalT x V. vinifera cv Chardonnay. 'Vidal Blanc': V. vinifera cv Ugni Blanc (Trebbiano) x Rayon d’Or (Seibel 4986). Leaves.	V. vinifera × V. labrusca cv Summer Black. Young and mature leaves, inflorescences, flowers, young and large berries.	V. vinifera × V. labrusca cv Summer Black. Berries at several developmental stages treated with IGA3.	V. vinifera cv Muscat Hamburg. Micropropagated plantlets under normal and low temperature (4° C).	V. vinifera cv Corvina and PN40024. Several tissues at different developmental stages.	V. vinifera cv Bosco. Leaves from GRSPaV-free and infected plants in well watered and water stress conditions.	V. vinifera cvs Cabernet Sauvignon and Sangiovese. Berries at different developmental stages and from different vineyards.	Chinese wild V. pseudoreticulata Baihe-35-1. Leaves from a powdery mildew-resistant accession.	V. vinifera cv Cabernet Sauvignon and M4: V. vinifera x Vitis berlandieri x V. berlandieri ‘Resseguier n.1’. Leaves and roots from auto and reciprocal grafting combinations under well watered and water stress conditions.	V. vinifera cv Cabernet Sauvignon. Leaves from GLRaV-3-free and infected plants.	V. vinifera cvs Chardonnay (rootstock: 101–14), Chenin blanc (rootstock: Richter 99), Cabernet Sauvignon (rootstock: Richter 110) and Cabernet Sauvignon own-rooted. Phloem material from the whole shoot.	V. vinifera × V. labrusca cv Summer Black. Berries at several developmental stages.	V. vinifera cv Chardonnay. Leaves from Aster yellows-free and infected plants.
vvi_miC1-5p	GAAGTTATGAGTGTTTTGCAGGATCAGACGGTAAGAGTTGTATCATCATACCTCATCTTTTTATTTATATTTTTCTCCTGCAACTTTTACTTTTCTAGTCTATGCGAAGGTTTATAAATATGTCCAATAGGTGAAGTTTTGCTTCATTCCTGGAGATGCACTTTTTTATTGCTGTATAAGACCAATCACCCCCCACAGCCACACCCTCATCTATACCCACATCCACATGGCCCCAATAGATGGGGCACTAACTGCACCGTAATTTTTGCAGCATGCTCTCCTACAAT	GTGTTTTGCAGGATCAGACGG	chr1: 10111687 10111707	21												miR041	Vvi-miRC77
vvi_miC2-3p	ACTCATCACACTGCCCAGATCAGGTTAGAGGTCAATTATGCCATTTGCTTTTATGTTGACATATTTTCTTTTTCTCATACCTATAGTTGGTAACTGCAAGGATATGATAGTTGCTTGCTCACTATAAGTGATCTGTTTGGTCTGCCCTTTACAGCCAGATACTTTTTAATAATTTCCCTTCTATCGTGGTCTTTTCTTTTCATGTTTATCCAACTTCACAGAACTGCTTAGATTGCATTTTTTTTTCATTAATGATTCTTTTGTTTACCATAAGAAAATAATGTTCCTTGGCAGGTGGCTGAGAACTTGATGGTTATGAATCTCAG	TGGCTGAGAACTTGATGGTTA	chr1: 10113799 10113819	21												miR070	Vvi-miRC78
vvi_miC3-3p	CCTCCAAAGCCTAAGTCAGACGTTAAGAAGAATGGAAATCTTTGAGGAGAGAGAGAGAGA TAGAGAGTGGGTCTGAGAACTTACAGTGTCCCCAAATGTTTTCATTCTTCTTAATGTTTGACTTAGGCTTCGGAGA	TTCTTCTTAACGTCTGACTTA	chr1: 1023496 1023516	21									va-miR017
vvi_miC4-5p	Predicted secondary structure available at doi: 10.1111/j.1365-313X.2010.04208.x	TTTGAGAGGAAGAGGAAGAAA	chr1: 11257316 11257336	21							miRC27
vvi_miC5-3p	ATGTCGAATGTGAGAATTGGAGGAAACTAAATAGATTGCTAATCCCATTATTCTGGTTTAAGCAATAAGCACTTTCTATTTAGTTTCCTCCAATATCTCATCTCTGGCTT	TTTAGTTTCCTCCAATATCTCA	chr1: 11721674 11721653	22															vvi-miRC2275
vvi_miC6a-5p	CTGAAGGTTTTTGGAGATCGTCTTGAGGGGAAGTATAGAGAGAGGGACTGATAGCACGCATCCTTCTCGTTTGAAGCTGAGCAATTCTCCTCAAAGATTGGCTCTTCTAGGTATGGTCAC	TTGGAGATCGTCTTGAGGGGA	chr1: 14504579 14504599	21															grape-m4757
vvi_miC6b-5p	TTGAAGATTTTTGGAGATCGTCTTGAGGGGAAGTACAGAGAGAGGGACTGACAGCACGCATCTTTCTCGTTTGAAGCTGAGCAATTCTCCTCAAAGATTGGCTCTTCCAGGTATGGTCAC	TTGGAGATCGTCTTGAGGGGA	chr9: 20314939 20314959	21															grape-m9201
vvi_miC6c-5p	ACGTGACCATACCTGGAAGAGCCAATCTTTGAGGAGAATTGCTCAGCTTCAAACAAGAAGGATGCGTGCTGTCAGTCCCTCCCTCTATACTTCCCCTCAAGACGATCTCCAAAAATCTTCCG	TTGGAGATCGTCTTGAGGGGA	chr9: 16648924 16648905	21															grape-m9401
vvi_miC7-5p	CTGATTAGCTAGTTGGTGAGACAATAGCTTACCAAGGCAATGATCGGTAGCTAGTCTGAGAGGAT	CTGATTAGCTAGTTGGTGAG	chr1: 15746987 15747006	20	vvi_miC7-3p	CGGTAGCTAGTCTGAGAGGAT	chr1: 15747031 15747051	21														vvi-New57
vvi_miC8-5p	GAGTGAAGTCGTAACAAGGTAGCCGTGTTGGAAGGTGCAGCTGGATCGCCTCATTTTCAAGGAGAGCTAATGCTTGTTAGGTATTTTGGTTTG	GAGTGAAGTCGTAACAAGGTA	chr1: 15748211 15748231	21	vvi_miC8-3p	GCTTGTTAGGTATTTTGGTTTG	chr1: 15748282 15748303	22														vvi-New59
vvi_miC9a-5p	GAGTCTTGCATGAAGAGGTTGAGAGTGGAATGCAGCCAAGAATGATTTGCCGGAATTTATATATAGTGAGAAGAGAAGAGGCTATAGGCTTTCACATATATAGTGAACCCTGGCAAGTTGTCCTTGGCTACATTTGATTCTCTTCTTCTTATGTGAGTCTCC	TGAAGAGGTTGAGAGTGGAATG	chr1: 16106474 16106495	22															grape-m0477
vvi_miC9b-5p	GAGTCTTGCATGAAGAGGTTGAGAGTGGAATGCAGCCAAGGATGACTTGCCGGAATTTATATATAGTGAGAAGAGAAGAGGCTATATGCTTTCACATATATAGTGAACCCTGGCAAGTTGTCCTTGGCTACATTTGATTCTCTTCTTCTTATGTGAGTCTCC	TGAAGAGGTTGAGAGTGGAATG	chr1: 16112962 16112983	22															grape-m0479
vvi_miC10-5p	ATCTGAATCAAACATATACACCTCAATGTGTTTGATTCAGATCTCT	ATCTGAATCAAACATATACACC	chr1: 17879272 17879293	22	vvi_miC10-3p	TCAATGTGTTTGATTCAGATCT	chr1: 17879294 17879315	22																c9415
vvi_miC11-5p	AGAAGGTGCTAACATGAATGAGCACTCTCCTAGGGAAGGTGGGGTGAGGTACTCATTGAAGGTGCTTTGC	AACATGAATGAGCACTCTCCT	chr1: 17956458 17956478	21															grape-m4795
vvi_miC12-5p	AAGGCTCACGCTTCAGTGAGTGTGGCGTCAACGACATTCATACGGGTGCCTGATAAGCGCCTTAGGCCCAAAGGTGTTCACCTTTTGGGTTCTCCGCCTTTTTACCAATGCCTTTGGGCATTTTCAGGATGCCATGCCCCATAGAGTCATGCCTC	CTTCAGTGAGTGTGGCGTCAACG	chr1: 18514156 18514178	23									va-miR061					novel_mir_8
vvi_miC13-5p	Predicted secondary structure available at doi: 10.1111/j.1364-3703.2012.00815.x	CTAGGGGTCGACCGGTTGACTAGC	chr1: 19084821 19084798	24	vvi_miC13-3p	GGCAGGTGACCGTTGGGCCTCAGC	chr1: 19084779 19084756	24						s840122
vvi_miC14a-5p	TTAGGGTTAATTTCACTCATCTTCCCTAAGGTTTTGGGCTAAATGGATTTGGTCATCATTAGTTTAGAATTTTATCAAATACCTTCCTTACCCTTTTATCTGGTATTCACTCACCTTCTCTTCAACTCAAAATAAGAGGGGTATTTGATGAAATTTCAAACTTACAGGGGCTAAGTTTATTTAGCTCAAACCTCGGGGAAGTGAGTGAAATTTATGTAGAAAATTAAAACACCAAG	TTTCACTCATCTTCCCTAAGG	chr16: 15764087 15764067	21															grape-m3147
vvi_miC14b-5p	ATAGGGTTAATTTCACTCATCTTCCCTAAGGTTTTGGCTAAATACACCTGATGCCCATTAGTGTAAGATTTTGTCAAATATCTCCCTTATTTCAAGTTAGAGAGGGGTGAGTGAAAATAATAAATGAGAATGGTAGGAGATGTATTTGATGAATATTCAAACAATTGAGAATCAAATATA TTTAGCCTAAATCTCAGGGAAGGTGAGTGAAATTAACCCATT	TTTCACTCATCTTCCCTAAGG	chr1: 19488989 19489009	21															grape-m4809
vvi_miC15-5p	TACTAGAAAATCATACCTCGATCTTCGGTTTCCGCAGAGGCAATCTGAGATCGAGAATGAAACCCTAGAT	TCATACCTCGATCTTCGGTTTC	chr1: 19610994 19611015	22	vvi_miC15-3p	AATCTGAGATCGAGAATGAAA	chr1: 19611025 19611045	21									Vvi-miRC54									Vvi-miRC54
vvi_miC16-3p	AACTCAACTCAGACTTAAAAAAATGAGGTGAGTTTGGGTTGTTTGAGTATCTCATGTTAAAGTTCAGGTTTATTGTTTTTTAATTCTGGTTAGACT	CAGGTTTATTGTTTTTTAATT	chr1: 19833881 19833861	21									va-miR074
vvi_miC17-3p	CAACTTAAAGAGCTCCTTGCCTTAACACTTGATTGGAATTCTTGGAAAGGGACGGTATCTGAAATTCACTTCATGGGTCTTATGAAACTGGAATATTTCTCCTCGTACTTATCACCTGCTACAAACAACTCTCTGGTTTTCGATATTACAAGTGACTGGATTCCTCCTTTCAGTCTCAAGCTTATCAGAATCGGCAACTGCATACTGTCTCAAACATTCCCTGCCTGGCTCGGAACTCAGAAGGAACTTTCCCATATAATCCTCCGTAATGTCGGGACCGAGATTTTTGGCTCTGGTGCCAAAGCGACCCATAGTGGCCTCCCCAGGATTCGAACTCAAGACTAAGGTCTTTTTGGTT	ATTCGAACTCAAGACTAAGGT	chr1: 20086100 20086080	21													Vvi-miRC55									Vvi-miRC55
vvi_miC18	The authors do not report the precursor	TCAGAGAAGTGGCTCAAATGT	chr1: 21187429 21187409	21												miR055b
vvi_miC19-5p	TTTCCTTTATTTATTTATTTTTTGGCTGAGAGAGTACCTGAGAAAAAACATTTGAGTCACTTTTCTAATTTTTTTGTTTATGCAAATTGAAAGAGATAGTGAAAACAAAAACTTCAGAGAAGTGGCTCAAATGTTTTTTCTCAGGTATTCTCTCAGCCAAAAATAAATTAATCTTCCATTGAAGGGGA	TGAGAAAAAACATTTGAGTCACTT	chr1: 21187504 21187481	24	vvi_miC19-3p	GTGGCTCAAATGTTTTTTCTCAGG	chr1: 21187421 21187398	24																	c6358 / c7672		vvi-miRn110
vvi_miC20-5p	TATCTTATCTCATGTTTGGTTAGTGATGGGATAAGATGAGTTATCCTATCACTTATCATATCCTATGTTGAACAAATATGGGATAAGATA	TGTTTGGTTAGTGATGGGATAAGA	chr1: 21550156 21550133	24																			n_337
vvi_miC20_V1-5p	TATCTTATCTCATGTTTGGTTAGTGATGGGATAAGATGAGTTATCCTATCACTTATCATATCCTATGTTGAACAAATATGGGATAAGATA	ATGTTTGGTTAGTGATGGGATAAG	chr1: 21550157 21550134	24					Variant of vvi_miC20-5p in the same locus														n_529
vvi_miC21-5p	ATAGAGAAGTTTCAAGTCAAAGTCGAACAAGAAAAGCTTCGTTCCCACTTTGATTTTTGCTACTTCTTCCT	TTCAAGTCAAAGTCGAACAAG	chr1: 22552257 22552237	21									va-miR019			miR088	Vvi-miRC79
vvi_miC22a-3p	TGAGTTTAGAGTATATTTGATAGTGATTTTAAAAAATATTTTAAGTATTAAAAATATTATAAATATTTTCTAAAATCACTACCAAACGGTTCTTAATCTT	CTAAAATCACTACCAAACGG	chr1: 22703596 22703615	20									va-miR065-1
vvi_miC22b-3p	CTAAAACTATGTTTGGTATTGATTCTAGAAAACGTTTCTAGTCTTTTTAACACTTAAATAATAAAAAATTTCAAATGTTAAAAAAATTAAAAGTACTTCCTAAAATCACTACCAAACGGACTGTATACTT	CTAAAATCACTACCAAACGG	chr7: 17729834 17729853	20									va-miR065-2
vvi_miC23-3p	The authors do not report the precursor	TGAGATCGAAAAAGTGATAGGATA	chr1: 2759237 2759260	24	vvi_miC23-5p	TCCTGTTACTTATCCTATCTCTTA	chr1: 2759147 2759170	24							VITIS-MIR32
vvi_miC24-5p	CACCTAGCCCCCATCGGTTTGAAATTTCATCAAATACCTTCACTATCATTCTTATTTCTAATTTTCACTCACCTCCCCTCTCACTCAAAATAAGGAAGGTCTTTGATGAAATTTCAAACCTATGCGGGTTAGATGT	CCATCGGTTTGAAATTTCATC	chr1: 361333 361313	21															grape-m4846
vvi_miC25-5p	CATTTTAAGGAGGACAACCAAGCTGGATGCCATAAAATAAAAACATAGACAGTTCTTTTTATGTCTATTCAAAAGAGGTGCCTATGTCTTTATTTTACAGCATCCAACTTGGTTGTCCTCCTTAAGATGG	AGGACAACCAAGCTGGATGCCAT	chr1: 3736564 3736542	21														novel_mir_9
vvi_miC26-3p	AAAAGGGAGAGAGAATTAGCGGGAGCTGTGGGTATGGGAGGATTGGGGAGACGATGAATTAGGAAACTGGATCTGAAGAAAACATTTTCTTCCCAAGACCCCCCATGCCAACAGCTTCCGGTTGTTCCTCCCTTTCCCTGATTTGTCCTTGTTACGATCTGATTTTTGCTACCGGAGTTT GGTAAGATTTCTCATTTATTTATCTATTTCTTGAATTTTAATTCATGCGATAGCTTCATG TGTTAGTGTGCTGAAAAAGTTCATATCATTGGGTTAAAG	CAGCTTCCGGTTGTTCCTCCC	chr1: 3865915 3865935	21	vvi_miC26-5p	GAGAGAGAATTAGCGGGAGCTGTG	chr1: 3865810 3865833	24	vvi_miC26-3p in tandem with vvi_miC1067-3p																c1373
vvi_miC27a-3p	CACCATCCATAATTTCATAAAATTAAATTTATATTGAAATGTTTCTCTTTATACTTTTAATATAAATTTAATTTTTTTATAGGTGATTAATATAAAAATTATGAAAAGTATTTATTTAAAAAATATTTATTATAAATTCAATTTTATAGAATTATAAAGACGTCTTCAACGTAAATTCAATTATTTTTTCAATGTGTAATTGATATGAACATTATGAAAAATGTCCTTCAAAAGACACTTTTAGTATAAATTTGATTTTATGGTATTATTAAAAGTA	AAATTTGATTTTATGGTATT	chr1: 4771447 4771466	20								VV-MIR003a	va-miR096
vvi_miC27b-5p	ACCTTTTTTGATTTCATAAAATTGAATTTATACTAAATATATCTCTTCAAAAGATATTTTTCTATAATTTTTTTATTAGTTGTATACGAGAAAAAAAATTGAATTTACACTAAAAAAATATATATTTTTCACAATACCATAAAATCAAATTTATATTAAAGG	AAATTTGATTTTATGGTATT	chr9: 1584232 1584213	20								VV-MIR003b
vvi_miC28-5p	TTAATTCATGCAAGATCAATCGGGCTTTGGTGGGGGACCCAACATATGTGATTTCCTTATGATTGATTGATTGTTTGTTTGATTTAATT	TTAATTCATGCAAGATCAATCGGG	chr1: 4823844 4823821	24	vvi_miC28-3p	TGATTGATTGTTTGTTTGATTTAATT	chr1: 4823781 4823756	26														vvi-New84
vvi_miC29-5p	The authors do not report the precursor	ATTTTGAGAGGTTTAAAAAGC	chr1: 5086517 5086537	21	vvi_miC29-3p	TTTTTAAACCTCCCCAAATCA	chr1: 5086575 5086595	21							VITIS-MIR46
vvi_miC30-3p	CGAACTCAAGACTAAGGTCTTGAGTGTTACCCTCCTGGTACCATCTGAGCAACTTACTCAGATGGTACCAGGAGGGAAACAATAAGGACCTTAGTCTTGAGTTCGAA	AAGGACCTTAGTCTTGAGTTCGAA	chr1: 5780069 5780092	24	vvi_miC30-5p	CGAACTCAAGACTAAGGTCTTGAG	chr1: 5779986 5770009	24														vvi-New7
vvi_miC31-3p	Predicted secondary structure available at doi: 10.1111/j.1365-313X.2010.04208.x	GGAGACCTGAACTGAAGAGC	chr1: 5784405 5784386	20							miRC37
vvi_miC32-5p	AATCTGAGACCCTTTTTTTGATAAGTAAAAAAATCTGAGACTTTTTTCTTTACTGATCAAAAAAAGGGTCTCAGAGTTT / AGATGTTGCAACTACAAAATCTGAGACCCTTTTTTTGATAAGTAAAAAAATCTGAGACTTTTTTCTTTACTGATCAAAAAAAGGGTCTCAGAGTTTTTAGTTGCGACATTT	AATCTGAGACCCTTTTTTTGA	chr1: 6826145 6826165	21	vvi_miC32-3p	AAAAAAAGGGTCTCAGAGTTT	chr1: 6826203 6826223	21			miRC34											vvi-New1*
vvi_miC33-3p	AGATACACAAGGCCGATAGGTTGCTTATTCCACCCTAATATCGTTGATATAGAGAGACAATCATCGGATGAGAAGGTGGGGATGAGAGATGGTGGGGTACGAACTAGAGGTGGTGGGGTATGG	TGGGGTACGAACTAGAGGTGG	chr1: 7530768 7530788	21														novel_mir_7	grape-m0738
vvi_miC34-3p	TGCTGGAGGGTGAAACCTGTGTTTGTTGATGAAAAATCCTGCTTTCCCTTCAAACCCAAGACATGGGATGAATATTATTCATGTACTGGAGGCAAAGGTAGGATTGGGTCAAAAGTCAGCT	AGGCAAAGGTAGGATTGGGTCA	chr1: 7871787 7871722	21															grape-m4908
vvi_miC35-3p	CCTCTCTCTCATGCATGCACTACACTTCACCTACCAAAGTAAAAGCCAAAACCCCAAATATAAAACCAAAGATTTTAGACTAACGAAGAATTTGAGCTTTTGCTTTTACCTCTCTCAGCCCATTTGCTGAGATGGGGTTTTCTTGGATGAAGTGGGTGCTGTCTCTTGGATGATG	GATGAAGTGGGTGCTGTCTC	chr1: 8218433 8218414	20															grape-m4912
vvi_miC36-3p	CCTTGCCAGATGGTAACGACAATAGAATAATTATCACTACAAGAAGAGGCGATATATCTAATTCTTTCAGAGATGATGATTCTATTGATATCCACAAG	CAGAGATGATGATTCTATTGA	chr1: 918288 918308	21								VV-MIR030
vvi_miC37-3p	ATGTATTTGACGTTTTATATAATGATGAAATAATGTAAATTGAGTGGATTTTATCATACAATAACATCAATTGATACAACCCTTAGGAAAAAGGATGCTACTATTTTATTTTTAAAAAATACCTGACATGTAACTATGATACTTTTTTAAAATGAATTAGTAGTATCCTCTTTCCCAAGGACTGTATCAATCAATGTTATTGTGGAATGATATCCACTCAATTTATATTATTTTATCATTACACAAGACGTCAAATAAGGG	ATTTCATCATTATATAAAACG	chr2: 10651408 10651388	21									va-miR077
vvi_miC38-3p	AAAATACAATTAAATTTTAAAAAGCTTTAAAGCTAAAAATATAAAAATAAAATATTAACTTTTACTTTGTCGAATGATATTAGTAGAAAATATAGATATCGAGTAAGAGTTGGAAATACAATAAGATTCAATATTTTATTTATTTTTTAAAATTTTAGGTTTTTTGGTTTTAATTGTATTCA	ATTTTAGGTTTTTTGGTTTTA	chr2: 13048540 13048520	21															grape-m6251
vvi_miC39a-3p	AAATTCATAATTGATTATGTCTAACGTTTATTGGTAAATTTTAATATTGAAAGAGGAACACCACAATTAGTACTTTTTCTCCTAGGACTTTCTTAAATTAACTTTTTATTACTCATTCATTGTTTGTGGAAAATTATAAAATAGGGCATAATTAGGACTTTTATG	ATAAAATAGGGCATAATTAG	chr18: 17780528 17780547	20								VV-MIR023a
vvi_miC39b-3p	CATAAAAGTCCTAATTATGCCCTATTTTATAATTTTTCCCAAACAATGAATGAGTAATAAAAAGTTAATTTGAGAAAGTCCTAGGAGAAAAAGTACTAATTGTGGTGTCTTTATTTCACTATTAAAATTTACCAATAAACATCAGACATAATCAATTATGAATTT	ATAAAATAGGGCATAATTAG	chr2: 13368970 13368951	20								VV-MIR023b
vvi_miC40-5p	TGCAAAAGGCTGCAGACCGTTTTGGAGGAGGGGGTTTTCTGTTGGGCTGTAAAAAGGATATTTGAAAAAGCTGGCAGGCAGCTGCAAAGGAGGTGGTCTGGCCGTTGAGGATATCTGGAGCTGCCAGCTGCAAGAGAGAGGTGGTGGTGCTTTTCAGAAGGGGTCAGGAGAGATTTGCAG	TGCAGACCGTTTTGGAGGAGG	chr2: 14372789 14372769	21															grape-m0941
vvi_miC41-5p	CTCTAAAGACAAAAGCAATTTAGATTACATTAGTAAGTATTAAACTCTTACAAGTGGAAAAATTACTTTTGTGTAATCTAAAGAATGTTCCTCTTGTAGAG	TTAGATTACATTAGTAAGT	chr2: 17923804 17923822	19																			n_96
vvi_miC42a-3p	GTTTGGTAGTGATTCTAGAAAACATTTCTAGTATTTCTAACGTTTGAATGATAAAAAATTTCAAGTGCTAAAAAAGTTAGAAGCATTTCATAAAATCACTGTCAAACGG	TAAAATCACTGTCAAACGG	chr16: 3450027 3450009	19	vvi_miC42a-5p	GTTTGGTAGTGATTCTAGA	chr16: 3450117 3450099	19														vvi-New63a
vvi_miC42b-3p	ATTTAGTAGTGATTCTAGAAAACAATTTTAACCTTTCTAACACTTGAATGATAAAAAATTTTAAGTGTTAAAAAATTTAAAAACACTTCCTAAAATCACTGTCAAACGG	TAAAATCACTGTCAAACGG	chr2: 2084733 2084715	19	vvi_miC42b-5p	ATTTAGTAGTGATTCTAGA	chr2: 2084823 2084805	19														vvi-New63b
vvi_miC42c-3p	ATTTGGTAATGATTTTAGAAAACGTTTCTAATATTTCTAACACTTGAATGATAGAAAATTTTAAATGTTAAAAATGTTAGAAGTGTTTTCTAAAATCACTGTCAAACGG	TAAAATCACTGTCAAACGG	chr4_random: 34480 34472	19	vvi_miC42c-5p	ATTTGGTAATGATTTTAGA	chr4_random: 34570 34552	19														vvi-New63c
vvi_miC42d-3p	TAAAATCACTGTCAAACGGGATTAAAAACGTTTCTTTGAATCACTATTAAACAAGCACTTACAGTTCGTTTGACAATGATTCTATG	TAAAATCACTGTCAAACGG	chr7: 6134875 6134857	19	vvi_miC42d-5p	GTTTGACAATGATTCTATG	chr7: 6134808 6134790	19														vvi-New63d
vvi_miC42e-3p	ACATTTGGTAGTGATTTTAGAAAATGTTTCTAACCTTTTTAACATTTGAATGATAAAAATTTTAAGTATAAAAAATGTTAGAAACATTTTCTAAAATCACTGTCAAACGGAC	TAAAATCACTGTCAAACGGAC	chr11: 5147381 5147401	21	vvi_miC42e-5p	ACATTTGGTAGTGATTTTAGA	chr11: 5147290 5147310	21														vvi-New63e
vvi_miC42f-3p	GCGTTTGACAGTGATTTTAAAAAATGTTTTTAATCTTTTTAACACTTGAATGATAAAAATTTTCAAGTCTTAAAAATGTTGTAAGCGTTTTCTAAAATCACTGTCAAACGGAC	TAAAATCACTGTCAAACGGAC	chr17: 12125750 12125770	21	vvi_miC42f-5p	GCGTTTGACAGTGATTTTAAA	chr17: 12125658 12125678	21														vvi-New63f
vvi_miC42g-3p	GCGTTTGGTAGTGATTTTAAGAAGTGTTTCTAACTTTTATAACACTTTTCATCATTTAAAGTATTAAAAATACTAAAAACACTTCCTAAAATCACTGTCAAACGGAC	TAAAATCACTGTCAAACGGAC	chr19: 7804630 7804610	21	vvi_miC42g-5p	GCGTTTGGTAGTGATTTTAAG	chr19: 7804716 7804696	21														vvi-New63g
vvi_miC42h-3p	GCGTTTGAGAGTAATTATAAAAAGCATTTCTAACATTTTTAACACTTAAATGATAAAAATTTTCAAGTATTAAAAATATTTTCTAGAATCATTACCAAATGAACTCTAAAAGTGTGTTTGATAGTGATTATAGAAAATATTTTTAATATTTGAATGATAAAAATTTTAAAATGTTAAAAATATTAAAAGTGTTTATTAAAATCACTGTCAAACGGAC	TAAAATCACTGTCAAACGGAC	chr4: 4712269 4712249	21	vvi_miC42h-5p	GCGTTTGAGAGTAATTATAAA	chr4: 4712465 4712445	21														vvi-New63h
vvi_miC42i-3p	CCCACCTATTCTCTCTTTTAACCCCCTTTTGTTTTAAATAAAAATAATAATACTCCTCTTCTTTTTCCCTAACCCTTCTTTTCTCTCTTTTTCTTCTTCCCTCACCTTTTTCTTTTCTCTTATTATTTTTATTTGAGAAAAATAAAATAAAAAAAGGGTAAAGAGGAAATAGGTGGAAG	TAAAGAGGAAATAGGTGGAAG	chr9: 11316081 11316101	21	vvi_miC42i-5p	CCCACCTATTCTCTCTTTTAA	chr9: 11315923 11315943	21														vvi-New63i
vvi_miC43-3p	TTCAATAGACGATTTCCCTTTGAATTTTTTTTAAAAATTAATATTATAAAAAATAATTAA AAAATCCCAAATTAAAAGAAAAAATTAATATTATAAAAATTGAAAATCCAAACTAATTTTAAAAAAAAATCAAAGGAAATAGAGACGATTTTCCCATTAAAAA	AAAAAATTCAAAGGGAAATC	chr2: 3068859 3068840	20									va-miR103
vvi_miC44a-5p	CTAGGAAGCGCTTTTAATATTTCTAATACTTGAAATTTTTTATCATTCAAGTGTTAGAAATATTAAAAATAAATGTTTGGGAATGATTCTAGAAAGCGTTTCTAACATTTCTATTTCTAACACTTAAATGATAAAAAATTTTAAGTGTTAAAAATGTTAGAAACATGTTCTAGAA	CTAGGAAGCGCTTTTAATATT	chr15: 8914317 8914337	21	vvi_miC44a-3p	TGTTAGAAACATGTTCTAGAA	chr15: 8914471 8914491	21			miRC30_1											vvi-New54b
vvi_miC44b-5p	Predicted secondary structure available at doi: 10.1111/j.1365-313X.2010.04208.x	CTAGGAAGCGCTTTTAATATT	chrUn: 22229774 22229794	21							miRC30_2
vvi_miC44c-5p	Predicted secondary structure available at doi: 10.1111/j.1365-313X.2010.04208.x	CTAGGAAGCGCTTTTAATATT	chr13: 22416484 22416464	21							miRC30_3
vvi_miC44d-5p	Predicted secondary structure available at doi: 10.1111/j.1365-313X.2010.04208.x	CTAGGAAGCGCTTTTAATATT	chr14: 28522904 28522924	21							miRC30_4
vvi_miC44e-5p	CTAGGAAGCGCTTTTAATATTTTTAATACTTGAAATTTTTTATCATTCAAGTGTTAGAAATGCTAGAAACGCTTTCTAGAA	CTAGGAAGCGCTTTTAATATT	chr6: 8854693 8854713	21	vvi_miC44e-3p	TGCTAGAAACGCTTTCTAGAA	chr6: 8854753 8854773	21			miRC30_5											vvi-New54d
vvi_miC44f-5p	Predicted secondary structure available at doi: 10.1111/j.1365-313X.2010.04208.x	CTAGGAAGCGCTTTTAATATT	chr12: 10058759 10058779	21							miRC30_6
vvi_miC44g-5p	CTAGGAAGCGCTTTTAATATTTCTAATACTTGAAATTTTTTATCATTCAAGTGTTAAAAATACTAGAAATGCTTTCTAAAA	CTAGGAAGCGCTTTTAATATT	chr2: 3139870 3139890	21	vvi_miC44g-3p	TACTAGAAATGCTTTCTAAAA	chr2: 3139930 3139950	21			miRC30_7											vvi-New54c
vvi_miC44h-5p	CTAGGAAGCGCTTTTAATATTTATAATACTTGAAAATTTTTATCATTTAAGTATTAGAAATACTAGAAACACTTTATAGAA	CTAGGAAGCGCTTTTAATATT	chr11: 16923399 16923379	21	vvi_miC44h-3p	TACTAGAAACACTTTATAGAA	chr11: 16923339 16923319	21			miRC30_8											vvi-New54a
vvi_miC44i-5p	Predicted secondary structure available at doi: 10.1111/j.1365-313X.2010.04208.x	CTAGGAAGCGCTTTTAATATT	chr10: 1736126 1736106	21							miRC30_9
vvi_miC44j-5p	Predicted secondary structure available at doi: 10.1111/j.1365-313X.2010.04208.x	CTAGGAAGCGCTTTTAATATT	chr10_random: 6747 6767	21							miRC30_10
vvi_miC45a-3p	AGTGATTTTAGGAAGTGTTTATAGTCTTTCTAATATTTGAAAATTTTTATCTTTCAAGTATTAAAAATGCTAGAAACACTTCCTAGAATCACTGC	AGAAACACTTCCTAGAATCACTGC	chr4: 16395562 16395585	24	vvi_miC45a-5p	AGTGATTTTAGGAAGTGTTTATAG	chr4: 16395491 16395514	24							VITIS-MIR10*							vvi-New19b
vvi_miC45b-3p	The authors do not report the precursor	AGAAACACTTCCTAGAATCACTGC	chr6: 19741769 19741746	24	vvi_miC45b-5p	ATAGTGATTTTAGGAAGTGTTTCT	chr6: 19741842 19741819	24							VITIS-MIR17
vvi_miC45b-3p	AGTGATTTTAGGAAGTGTTTCTAATCTTTCTAATACTTGAAAAATAAAAATTTTCAAGTACTAGAAATGGTAGAAACACTTCCTAGAATCACTGC	AGAAACACTTCCTAGAATCACTGC	chr6: 19741769 19741746	24	vvi_miC45b_V1-5p	AGTGATTTTAGGAAGTGTTTCTAA	chr6: 19741840 19741817	24	Variant of vvi_miC45b-5p in the same locus													vvi-New19c					vvi-miRn052
vvi_miC45c-3p	GGTGATTCTAGTAAACGTTTCTAACTTTTCTAGCACTTGAAAATTTTTATCAAAAGAATTGCTTTGAAGTGTTAGAAATGTTAGAAACACTTCCTAGAATCACTGC	AGAAACACTTCCTAGAATCACTGC	chr2: 3637110 3637087	24	vvi_miC45c-5p	GGTGATTCTAGTAAACGTTTCTAA	chr2: 3637192 3637169	24														vvi-New19a
vvi_miC46-5p	CATAAATTGATAAGTAGCTTCCTTGACGGTCCTGAAGATCTCCAAGATTGCGAGATATGGCTCCCACAACAGCCCCTACTCCCTGAAAATTCAATGGCCAGTCAGTGATAGCTACATTCAAGTGG	TAAGTAGCTTCCTTGACGGTC	chr2: 4085299 4085279	21														novel_mir_11
vvi_miC47-5p	TTCACTACTAAGCGAAGTAGTTGTAGGGCTTCTCTCCTTCTGGCAGGAGATGGCAATAGATTATCCTTTGTGGCTTATCTCCGGTGTTGATTAACTTCCAATGACCCGCCAAAGGAGAGTTGCCCTGTGACTACTTCTGCTTAATATAAAC	AGCGAAGTAGTTGTAGGGCTT	chr2: 4101796 41017816	21												miR106	Vvi-miRC80
vvi_miC48-5p	AACTGTCCAATTCGGAGGGAACTGACCGGTTCGCTGATTGGACCATCGGTTCATCCGATTTGATTATGA	TTCGGAGGGAACTGACCGGTT	chr2: 4105687 4105707	21												miR016	Vvi-miRC81
vvi_miC49-5p	TGAGTTCGAATCCTGGGGACGTCAATTCGAATCCTAGGGATGTCACTTTAGTCCCAAAGCGACCCAAAGTGGCCTCCCCAGGATTCAAACTCAAG	TGAGTTCGAATCCTGGGGACGTC	chr2: 636226 636248	23	vvi_miC49-3p	CCTCCCCAGGATTCAAACTCAAG	chr2: 636298 636320	23														vvi-New75
vvi_miC50-3p	TTCTTTTCTTTTACTTTTCCTCTTTATTTTATTTCCTTTCCATTTTTCCTCAAACTTTGTGAAAATCAAACATAGCTTAAGACTATGTTTGGTTCTCAGAAAATTTGAGGGAAAATGCAAGGGAAAGAAAATATAAAGGAAAAATAGAAGAAAAGAAAA	AAGGAAAAATAGAAGAAAAGAAAA	chr2: 7861074 7861097	24	vvi_miC50-5p	TTCTTTTCTTTTACTTTTCCTCTT	chr2: 7860939 7860962	24														vvi-New6
vvi_miC51-3p	TCAAGAGAAATTCATATTTATATAGTGTCAGAAACTTTCCCCCCCTATCTGATGTAGGATGTCACAATTTAAGTTTAGGATAAACAAATTGGACCTCAAATATTGACTTCAAGTTTTTTTAATATTTATCATTATTTAGAAACATTTGAAATATGACCAAATAATACAATCAAAATTATTTATCAACTAAATGCCTTGGAAAATAGTCTTCTAATGCATCAAACAAACATTGTACTTCAATTGTA	TGACACTATATAAATATGAA	chr2: 8034462 8034443	20									va-miR037
vvi_miC52-3p	AAGCTCCTCATTTATTTGTATTTGCACCTGCACCTTACCTACTTTTCTTTTTAGTGCCAATGTTCACTTCATCATCATCCTAGAAAACCCTAGAAACTCAAATTAAGGAGAGGTGTAGATGCAAGTGCAGACAAATGGCAT	AGGTGTAGATGCAAGTGCAGA	chr2: 8092986 8093006	21	vvi_miC52-5p	TGTATTTGCACCTGCACCTTA	chr2: 8092892 8092912	21								miR057	Vvi-miRC57									Vvi-miRC57
vvi_miC53-5p	Predicted secondary structure available at doi: 10.1111/j.1364-3703.2012.00815.x	CAGTCTCTGAAGTAGCTCCAT	chr2: 942238 942208	21										s612169
vvi_miC54-5p	Predicted secondary structure available at doi: 10.1111/j.1364-3703.2012.00815.x	TATAATTGGTTCAAGATGGTT	chr2: 942374 942354	21										s1233315
vvi_miC55a-3p	Predicted secondary structure available at doi: 10.1111/j.1365-313X.2010.04208.x	AATGCTAGAAACACTTCTCAA	chr14: 10280589 10280609	21							miRC28_1
vvi_miC55b-3p	AGGAAGTGTTTTTAGTCTTTCTAACATTTGAAAATTTTTATTTTTCAAGTATTAAAAATGCTAGAAACACTTCTCAA	AATGCTAGAAACACTTCTCAA	chr3: 10127808 10127788	21	vvi_miC55b-5p	AGGAAGTGTTTTTAGTCTTTC	chr3: 10127864 10127844	21			miRC28_2											vvi-New13a
vvi_miC55c-3p	AATGCTAGAAACACTTCTCAAAATCACTGACAAACGCACTTTAAGAGCCCATTTGGTAGTAATTTTAGGAAGTATTTTAATATTTTTAATACTTGAAAATTTTTATCATTTAAGTATTTGAAATGTTATAAACGTTTTCTAAAATCACTCTTAAATGTACTAAAGGTTGTGTTTGACAATAATTTTGAGAAGCGTTTCTAACATTTC	AATGCTAGAAACACTTCTCAA	chr4: 5017140 5017120	21	vvi_miC55c-5p	GAGAAGCGTTTCTAACATTTC	chr4: 5016954 5016934	21			miRC28_3											vvi-New13b
vvi_miC56-5p	GGCATGAGCAAAGTTGGAAAGATGGGGGTATTGAAAAGAGAGGTATGCAATTGACTATATTTTTATACATTCAATTATAATTTCATTATGTTATAATTGTTTTACAATGTAAAGTATAAAAATTCAACAATCCTTAAGACTTAGAATTGATGTTGAGCTTCAATAATGAATATTAACTCACAAATGTATCATTTATTTTGAGACCAATGAAAATATATCAAATCATTACCTTTTGAGATCTTATTTTGATATTAAAATTCCTTGTGTTGATGATTTATGAGGTGGATTTATTATGTAAGAGGCATGGTCTAGTTTGGAGACAATGCATTTACCTGTAGGAACATTTCACTTTGCCTAGAG GCG	AAGTTGGAAAGATGGGGGTAT	chr3: 10411836 10411856	21								VV-MIR007				miR018
vvi_miC57-5p	TCCCAAGTAACGGGATTTTGGTAACTTAACCTACAACATGAAATAAGGAAAATATATTACAAATATGTCGTAATTTCTTATTTAAGCCTAAAGGGCAATAGTTTTAATAGTACATTACAAGACTAGTCAACTCATGAAAAGAGACATTAGGGTTAGGCCAAAATGAGACGAAATGAGAGGAA	CGGGATTTTGGTAACTTAACC	chr3: 10530790 10530770	21															grape-m6873
vvi_miC58-5p	AGAATTGGGAGGGTACAAAGAATGTGGGAATACTTTCACATTCTTCGTACCCTTGTGAATTTTTT	AGAATTGGGAGGGTACAAAGAATG	chr3: 12430206 12430229	24	vvi_miC58-3p	TTCTTCGTACCCTTGTGAATTTTTT	chr3: 12430246 12430270	25														vvi-New23
vvi_miC59a-3p	ACCAGTTGCCTACTTATCTCAACCGATAGCCACTGACCCTTTGTTTATGCAGCACCCAAAGGGGCAGTGGCTACCGGTTGAGATAAGTAGGCAACCGGTAG	TTGAGATAAGTAGGCAACCGGTAG	chr3: 12458983 12459006	24	vvi_miC59a-5p	ACCAGTTGCCTACTTATCTCAACC	chr3: 12458906 12458929	24														vvi-New88b
vvi_miC59b-3p	ACCAGTTGTATACTTATCTCAACCGGTAGCCACTGCCCCTTTTGGTTGCTGCATTGTCAAAGGGGCAGTGGCTACTGGTTGAGATAAGTAGGCAACCGGTAG	TTGAGATAAGTAGGCAACCGGTAG	chr14: 17551049 17551026	24	vvi_miC59b-5p	ACCAGTTGTATACTTATCTCAACC	chr14: 17551127 17551104	24														vvi-New88a
vvi_miC60a-3p	TCTGGTTGGTAGTGATTTTAGGAAGCACTTCTAACCTTTCTAATACTTGAAATTTTTTATCAAAAAGGTTGTTTTCAAGTACTAAAAATGTTAGAAACACTTCTTAGAATCACTGTTAAACAAG	AGAAACACTTCTTAGAATCACT	chr3: 1297018 1296997	22								VV-MIR010a
vvi_miC60b-5p	TATGTTTGACAGTGATTCTAAGAAGTGTTTCTAACATCTTTAATATTTGAAATATAAAAATTTTCAAGTGTTAGAAAGATTATAAACATTTCCTAAAATCATTGCCAAACACAC	AGAAACACTTCTTAGAATCACT	chrUn: 7570772 7570793	22								VV-MIR010b
vvi_miC61-5p	TGACGGTGTAGCCGCGTTGGAGCAGGAGCTTGACCAGCCATGAAGCTATGTACCCAGAAGCCCCTGTAACGCACACCACTT	GCCGCGTTGGAGCAGGAGCTT	chr3: 13241578 13241558	21															grape-m6905		grape-m1355
vvi_miC62_V1-3p	The authors do not report the precursor	GTACATGGTTGGGTGTGAGTCATT	chr3: 14878139 14878116	24	vvi_miC62_V1-5p	TGTAATAACTCACACCCAACCATG	chr3: 14878398 14878375	24	Variants of vvi_miC62-3p and vvi_miC62-5p in the same locus						VITIS-MIR41*
vvi_miC62-3p	The authors do not report the precursor	ATATGTACATGGTTGGGTGTGAGT	chr3: 14878143 14878120	24	vvi_miC62-5p	CACACCCAACCATGTAGATATCAT	chr3: 14878388 14878365	24							VITIS-MIR40
vvi_miC63-5p	TTTGCCTCGAATAGATCAGATAGTCGACGCCATTGCTAGGCATGGAATTATCTCATTTCTAGATGCCTTTTCTAGATACCACCAGATCCCTATGTTTCAGCCAGACGAGGAGAAAACAGTCTTTGTCACGCTAAAAGGACTGTATTGTTATAGAGTCATGTCGTTTGGACTCAATAATGT TGGTGCTACCTACTAGAGACTAATGAAAAAAATCTTCAAGCCCTTGATGGTTCGAACTGT GGAAGTCTATATTGACGACTTTGTTGTAAAGAGCGAG	ATAGATCAGATAGTCGACGCC	chr3: 15367134 15367154	21															grape-m6710
vvi_miC64-5p	CGAGGAACTATGCCAAGAAGCACATTCCTCCTATCTAACTTCCCTTCCCTAGGGAAGTTAGATTGGAGGAATGTGCTTCTTGGCATAGGAGGGCTGTATGGTGCCGCTGGCAGCCTCGC / CTATGCCAAGAAGCACATTCCTCCAATCTAACTTCCCTAGGGAAGGGAAGTTAGATAGGAGGAATGTGCTTCTTGGCATAG	TGCCAAGAAGCACATTCCTCC	chr3: 17003659 17003639	21	vvi_miC64-3p	AGGAATGTGCTTCTTGGCATA	chr3: 17003603 17003583	21								miR058	Vvi-miRC82	novel_mir_13					n_231				vvi-miRn115
vvi_miC65-3p	TTTCACATTGCCTCCTTTGTTGGGACTGAGTCTCATTTTCTTTTGATCTTTGTTGGAACACATGAAGGGTTAGTCTGGAATGGAGGGGCATATGATTTT	GTTAGTCTGGAATGGAGGGGC	chr3: 1771736 1771716	21															grape-m6790
vvi_miC66-3p	ATAGGTGCATATTTTGGAGCACAGTGCCAGAAGCATGGGATGCTAGTACGTGTTGCAGGGGATAGCATCATG	GCTAGTACGTGTTGCAGGGGA	chr3: 17920064 17920044	21															grape-m6953
vvi_miC67_V1-3p	CCGGTCCGCACCAACACACGTATTATTAAAGTGTTACACATGTAGTGCCATCATATGAAGAAAAGTGTATGATTTTTTTAATCAATCAGTTCTTTATATTATGGGACTACATGTGTTACACTTTGATGACATGTGGGTTAGTGTGGACCGG	TTATGGGACTACATGTGTTACA	chr3: 17925372 17925351	22	vvi_miC67-5p	TACACATGTAGTGCCATCATA	chr3: 17925436 17925416	21	Variant of vvi_miC67-3p in the same locus											miRC122
vvi_miC67-3p	ATTAAAGTGTTACACATGTAGTGCCATCATATGAAGAAAAGTGTATGATTTTTTTAATCAATCAGTTCTTTATATTATGGGACTACATGTGTTACACTTTGATG	TTATGGGACTACATGTGTTAC	chr3: 17925372 17925352	21	vvi_miC67-5p	TACACATGTAGTGCCATCATA	chr3: 17925436 17925416	21										novel_mir_14
vvi_miC68a-3p	TATTTTTAATATTTCTAATACTTGAAAAATAAAAATTTTCAAGTATTAGACATGGTAGAAACACT	AGTATTAGACATGGTAGAAACACT	chr3: 18342466 18342443	24	vvi_miC68a-5p	TATTTTTAATATTTCTAATACTTG	chr3: 18342507 18342484	24						s397544_1								vvi-New30
vvi_miC68b-5p	Predicted secondary structure available at doi: 10.1111/j.1364-3703.2012.00815.x	AGTATTAGACATGGTAGAAACACT	chr11: 5419134 5419157	24										s397544_2
vvi_miC69	TCTTAAATAAAGTTTTTAAAAACAGTTTTCTATTGTAATCATTCTTCTGATAGTTATTTTTTAAAACAAGTGAAAATATATCCTGTCTTTAGGATAAATGTTCAAAACTAGTCTTCTATTAAAAATTTGTCAAATATGTTTTTGAATATGAAAAACAATTATTTGTTTTTTATAACAAAA ATTATTTTTAAAATCTATACTACTTATAAA	AGAAAACTGTTTTTAAAAACT	chr3: 3287518 3287498	21									va-miR090
vvi_miC70-3p	GAAAGGAAGTCGCATCCCTTGTTGAAAAAGAGAATGCCAAATTCCACCCGAAGTTGGGATTTCCATCTGCTATGTTCATAAGATGTGATGTGACTAATACAA	TGTTCATAAGATGTGATGTG	chr3: 4131965 4131984	20															grape-m6580
vvi_miC71-5p	AATTACTTGTTATGAACTCCTGTATGTGCAGCTTGCAAAATTAGCTGGAAATACAGTCATTGCAACTTGTGGAGGTAAGGAAAAAGCTATGCTGTTGAGAGATTTAGGAGTTGATCGAGTGATA	TATGAACTCCTGTATGTGCA	chr3: 4154897 4154916	20															grape-m6581
vvi_miC72a-3p	AAAGCCTAAGAACTCAATGGTACCCACCCCTCTTTGGCCAAGTTTGTATGATTTGAGAGGGAAGGTCCCGTTGAGTTCTCAGTAATCC	AGGGAAGGTCCCGTTGAGTT	chr3: 4778497 4778478	20									va-miR085-1
vvi_miC72b-3p	AAAGCCTAAGAACTCAATGGTACCCACCCCTCTTTGGCCAAGTTTGTATGATTTGAGAGGGAAGGTCCCGTTGAGTTCTCAGTAATCC	AGGGAAGGTCCCGTTGAGTT	chr13: 17639541 17639522	20									va-miR085-2
vvi_miC73-3p	CATACAAGCATTGTTAGGAGTGTGCTTCCCATGTCTAGCAAGTAGATTGGCACCACCCAAAGCCAAGGCATCTTTGGACTAGGAGTTCTAGTTTTTACTTCTGTGAACTTTGTAGGTGCAATCTAACTCTTCCAAATATTTATTATTATGTAGTAGTTGTACACTTGTACTTTGTGTAAGCGAATTGATTATTGGATTTTTAGTTAAATCAAATTTAAGGGTCTTTTGTTTAATTTACTAGAGATCTCTTGTTTGTAAT	TTTAATTTACTAGAGATCTCT	chr3: 4797023 4797043	21													Vvi-miRC58									Vvi-miRC58
vvi_miC74-3p	CCTCCATAAACAAAAATCTTGTAGGAAAAAAATCTGAATTTTTAGGAATTTGTTCTAAGAGCATTTTAGGAATTTATTCTAAGAGCATTTTTTTTGGCTATAGGATGTTTGTTTATGGAGGAA	ATAGGATGTTTGTTTATGGAGGAA	chr3: 5093702 5093725	24	vvi_miC74-5p	CCTCCATAAACAAAAATCTTGTAG	chr3: 5093603 5093626	24														vvi-New34
vvi_miC75a-3p	GCAAATTGTCCTCTGTTTGGTTGCTAAGAAAATTTTGTTTAAAAAAGACCTACTGTGAAGCTCCAAATCTCACTAGCTTCGTTTGTTTTTAAATTTAAATTATCATTTTTTAAAAATATATATAATTTAATCTAAATGGACGAATTTAACTCACTCATTTTCTCTTCTCAAATTCGTGCA ACACCCCAATACAAATCTCACCCTGTCTTCGCTT	TTTCTTAGCAACCAAACAGAG	chr19: 5056412 5056432	21									va-miR006-1			miR054a
vvi_miC75b-3p	GCAAATTGTCCTCTGTTTGGTTGCTAAGAAAATTTTGTTTAAAAAAGACCTACTGTGAAGCTCCAAATCTCACTAGCTTCGTTTGTTTTTAAATTTAAATTATCATTTTTTAAAAATATATATAATTTAATCTAAATGGACGAATTTAACTCACTCATTTTCTCTTCTCAAATTCGTGCA ACACCCCAATACAAATCTCACCCTGTCTTCGCTT	TTTCTTAGCAACCAAACAGAG	chr3: 5432416 5432436	21									va-miR006-2			miR054b
vvi_miC75c-3p	TGGCCTTATCCTCTGATTGGTTACCGAGAAAACGCAGGAAAATAAAAGAGGCAGGCTTATTTATTATTATTATTTTTTTCTTTCTTGAAGCTTCGGTTTTTCACTGTTTGTTGTCTTAGAAAATAAACCTCCATGTATAGTGGAGCTGAGATTCAACTTTCGGAAGCTGAAACAACAGATTTTGTAGGATGCCAAAATTTCATTCTGTTTTCTTTTTCTTACGCTTTCTTAGCAACCAAACAGAGGTCGAGGAATC	TTTCTTAGCAACCAAACAGAG	chr3: 5444574 5444594	21									va-miR006-3
vvi_miC76-3p	AATGAATTTTGAGTGGAGTGCCATGCGTGCCTTTGATGATTTTGTACTCGATTTAGTGACATGTGAGATATGTTTATGCTCTTTATTTTGCACTAACCCTCTCTCTTGATAGCGCGTAGTGGCTCGCTGCACAGGTACACACTCATTCCCACTCTGATTAGTC	AGGTACACACTCATTCCCACT	chr3: 5456900 5456880	21								VV-MIR019
vvi_miC77-5p	The authors do not report the precursor	CTAGGTATCTTTGATCGAAGGCGG	chr3: 546009 546032	24	vvi_miC77-3p	GTATTGAATTCAAATCAGAGATGC	chr3: 546056 546079	24							VITIS-MIR39
vvi_miC78-5p	TGCTTGGAGGCCAAACGAAGCGTACTGAGGGTACGAATTTGGTACGGCGTCGTTTTGCTATGCGGTAT	CCAAACGAAGCGTACTGAGG	chr3: 6148842 6148861	20															grape-m6603
vvi_miC79a-3p	TGTTTTTGAGAATTACTATCAAACACATTCTTAATTTGGTAATGTTTTAAAAAGTGAGTCTAAAAATTATTTTTGAAAAAATTTCCTATCTTTGAGAAAATTTAAAATTTTTTAAAGAAATTGAAAAAACACTTATAGTGATCTTATAGAAAAACATCTAGTAGGTGATTCTCTTCAAAATAAAGAGAAAACGCTTGTAATAAAAAATCCAAGAAAACAC	AGAATGTGTTTGATAGTAATT	chr13: 18334588 18334608	21								VV-MIR013a	va-miR087-1
vvi_miC79b-5p	TAAAATAATAAGAATGTGTTTGATAGTAATTTTATTGAAAATATTTTTAGTGAAAGTGTT TTAGTGTGCATTTGATAACGATTATAGAAAGTGTTTTTAGCTTTTTTTTAATACTTAAAAAATAAAAATTTTAAATCACTATCAAATACACTTTTAATTTCTCT	AGAATGTGTTTGATAGTAATT	chr3: 6894649 6894669	21	vvi_miC79b-3p	TCACTATCAAATACACTTTTA	chr3: 6894774 6894794	21				VV-MIR013b	va-miR087-2
vvi_miC79c-5p	ACCTATATTTAGAATGTGTTTGATAGTAATTCTAAAAAATGTAAATAGAGTGTGTTTTAT AGAATTTGTACTTGAAATGTTTTTAGTAGAAGTATTTTCTCTAGAAGTGGTTTTATGAGAATTATCTATCAAATATTTCTCTAAAAAACACT	AGAATGTGTTTGATAGTAATT	chr3: 9405643 9405663	21								VV-MIR013c
vvi_miC79d-5p	TAATTAATTAAGAATGTGTTTGATAGTAATTATAAAAAGTGTTTTTAGTACTTTTAATATATAAAATTTTTTAAGTGTTATAAAGGTTATAAATACTTTCTAAAATTATTATCAAACACATTCTAACTATAGAT	AGAATGTGTTTGATAGTAATT	chr5: 8750542 8750562	21								VV-MIR013d	va-miR087-3
vvi_miC79e-5p	ATTCAAATTAAGAATGTATTTGACCGTCATTTTAAAAAATATTTTTAATCTTTCTAATACTTAAAAAATTGTATTTTTTAAATATTAAAAATATTATAAACATTTTTTAAAATTACTATCAAACACATTCTAAATTTTTAA	AGAATGTGTTTGATAGTAATT	chr6: 19133891 19133871	21	vvi_miC79e-3p	TGACGGTCAAATACATTCTTA	chr6: 19133789 19133769	21				VV-MIR013e	va-miR087-4
vvi_miC80-5p	TTTTCTGTAGCAAGAAGTTGGATCCTCTTCCAACCAAGTTTATTACTAGAGAATTCAAGCTTCTTGAGGAACA	CAAGAAGTTGGATCCTCTTCC	chr3: 6931911 6931891	21														novel_mir_12
vvi_miC81-3p	AGAAGTTCTTGAATCCTCACAAGTCAATAATGAAGAGATAAATGCATACTTAAATACTATTAGTAGAGTTATCTTCCAAAGGTGGGAAGTCTCCCTTACTATAGTAATTAAGAATAAATTTGTCATTGATATTATTGCTTTGATTGATTCAGGAGCAGCTTT	TTTGATTGATTCAGGAGCAGCTTT	chr3: 7476538 7476561	24	vvi_miC81-5p	AGAAGTTCTTGAATCCTCACAAGT	chr3: 7476400 7476423	24														vvi-New92
vvi_miC82-3p	GGCTAATTTAGGTTAAATTAATTGATAATTTATATGGTTATACTCCTTTTAATTATTTAATTCGGATATGATATAATATTGTACTATATTTTGGATGTGAGTTTGCATATTAAATTAAGTTGATTTCGATTGTGGATTTAAGTTTGC	TAAGTTGATTTCGATTGTGGAT	chr3: 7752641 7752620	22															grape-m6845
vvi_miC83a-3p	TGGTAACTACGGTTTTATTTTTTTAAAACATTCAAAACTGTAGTCACCAACCACGGTCTTAACTTTTTTAAAGTTAAAACCGTGGTTGGTAACTACGACTTTGACTGTTTTTACAAATAGTCAAAGTCGTAGTTACCAACTACGGTTTTAACTTTAATTCTAAAACCGTAGTTGGTGACTACAACTTTGACTATTTTAAAAACAGTCAAAGCCGTAGTCACCAAC	ACAGTCAAAGCCGTAGTCACCAAC	chr14: 8245499 8245522	24	vvi_miC83a-5p	TGGTAACTACGGTTTTATTTTT	chr14: 8245298 8245319	22														vvi-New16a
vvi_miC83b-5p	ACAGTCAAAGCCGTAGTCACCAACTACGTTTTTAAACTTAAAGTTAAAACCATGGTTAGTGACTACAGTTTTGATTGTTT	ACAGTCAAAGCCGTAGTCACCAAC	chr3: 9269423 9269426	24	vvi_miC83b-3p	TAGTGACTACAGTTTTGATTGTTT	chr3: 9269479 9269502	24														vvi-New16b
vvi_miC84-5p	CGGACAATATCTATACGGTTGGGTGTGAGACGATACACTCTATTTGTGGATTCATGTGTACGTAGATGGAAGCACTGTCTTTAATTGATTTTGTAGATTTGTTGGGT	CGGACAATATCTATACGGTTG	chr3_random: 933352 933332	21	vvi_miC84-3p	ATTTTGTAGATTTGTTGGGT	chr3_random: 933265 933246	20														vvi-New52
vvi_miC85	The authors do not report the precursor	ATTTCAGCACTTCAAAGCTTG	chr4	21												miR111
vvi_miC86-5p	TAGCTTGCTGTTTGGCTGCCGAGAAACAGTAGGAAATTGAAAGAGAGAAACAGCAGAATCATGTTTTATATCGTGTTTATCTGAGAAGTAGTTGATGTTATCTAAATCCTTAAAAAAAAAAATAGTTTCTTTCATTTTCCTACTTTTTCTCATCAACCACACATGTTCCGATCAAACCACAGCTA / GCTGTTTGGCTGCCGAGAAACAGTAGGAAATTGAAAGAGAGAAACAGCAGAATCATGTTTTATATCGTGTTTATCTGAGAAGTAGTTGATGTTATCTAAATCCTTAAAAAAAAAAATAGTTTCTTTCATTTTCCTACTTTTTCTCATCAACCACACATGT	ACAGTAGGAAATTGAAAGAGA	chr4: 1141511 1141491	21	vvi_miC86-3p	TCTTTCATTTTCCTACTTTTT	chr4: 1141409 1141389	21			miRC39				VITIS-MIR25* / VITIS-MIR51		Vvi-miRC61		grape-m7209							Vvi-miRC61	vvi-miRn044
vvi_miC87-3p	CCACCAATTGTTTATTTGTTCCTTTTATAAAGGAGGTGTCCCCTACTCAGATGGTACCAGAAGATGGTTGGACATAAGGTTTAGTCCTACTATCGAATCCTCTTGGGGACGCCCCCTTTATAAAAGGGACAAATAAACAATTGGTGGAT	GGGACAAATAAACAATTGGTGGAT	chr4: 13164355 13164378	24	vvi_miC87-5p	CCACCAATTGTTTATTTGTTCCTT	chr4: 13164230 13164253	24														vvi-New61
vvi_miC88-3p	AGGAACACTATATTCACATTCACATGTCTTTAATATTTTATCATTTATTAATGATTGTTTAATGCAGTGATAATATGAACAGACGGTGTCATTGTTCT	TGATAATATGAACAGACGGTG	chr4: 19211900 19211880	21														novel_mir_17
vvi_miC89-3p	AAAGTTTTTTCGGGTTGTTTTCTTTTTCTTAATCCCAGGAAATTCATGCACTAAGGGCTCAGTTAGAAGCTGCAAAGTATGATGTGATAAAATACTGCATAGGTACCCTTGTTTCTATTTCAGCTGTGGGTCTTACTGTGATTCGCATTTTGATGTAAGGAGTTTAGCAAATCATGCCATTAGAAAAAAAAAAATCCAAAAGGCGAAGAAAAAGAAGATAAATAAGCTAA	AAAGGCGAAGAAAAAGAAGATA	chr4: 19502784 19502763	23												miR112	Vvi-miRC62									Vvi-miRC62
vvi_miC90-5p	GATGGTGTATTTATTAACCATTTAAATTTATTTCTCATAATTTTTTTTATGGATAATATACTTAAAGATATTTTATTTACCATGTGCTTTCCTTCTATTTTTTTTTCTAATTTTTCCCAATTTTTTAATACTAAATATAATAATTTTTTAAAGTAATAAACAAAAGCAACTTATAAAGTA AAAATTTAAATGAACAAATGAATAAATAATTTA	TTATTAACCATTTAAATTTA	chr4: 20080268 20080287	20									va-miR020
vvi_miC91_V1-3p	TTGAGGCAACTCTAGGAAGCCAACTTTACAAGATAGTTTTGAACAATAACCCTAGGAAAAGTGGCAATATAGCTTTCAGAACCTGTGGAGTTCACCCAAAAACAATTGAAGGGACAGTTTTCCTAGGTTTTAAAAGCTGTATGGCTACTTTCCCTATGATGATTGTACATAACCATTATCTTGAATGATTGAATTCCTAGAGTTTCAGTATCAA	TTTTAAAAGCTGTATGGCTACTTT	chr4: 20194986 20195009	24	vvi_miC91_V1-5p	AGTGGCAATATAGCTTTCAGAACC	chr4: 20194918 20194941	24	Variants of vvi_miC99 in the same locus																		vvi-miRn053
vvi_miC91-3p	AGGAAAAGTGGCAATATAGCTTTCAGAACCTGTGGAGTTCACCCAAAAACAATTGAAGGGACAGTTTTCCTAGGTTTTAAAAGCTGTATGGCTACTTTCCCTAT	AAGCTGTATGGCTACTTTCCCTAT	chr4: 20194992 20195015	24	vvi_miC91-5p	AGGAAAAGTGGCAATATAGCTTTC	chr4: 20194912 20194935	24														vvi-New5
vvi_miC92-5p	AACCAGAATTCAAGTGTGGGATTTTGGGTGGCTGGTTTTTTTTTCTTGAAAGAGGAGGAGGTTTCTGAGTGGAATTTTGATTTTTTTGGAACTTTTTTTTTTTTTTTTGGAAGGGGCTGCATGACTAAAGGTCATGATGGTGACACAAACTATGCCACATCAAAGGCACGACATGAGGAGTTTGGAC	CAAGTGTGGGATTTTGGGTGGCT	chr4: 20294016 20294038	23									va-miR076			miR059	Vvi-miRC83
vvi_miC93-3p	TGGTGTTGCAGATGGCTGTAGGGCATTGGTGAAGACTGTTCCAGTGTGATGCAAGGGGCTCCAAAGCTTGGACTATTGCCGGTGTTGGAAGGTTGTCGCGCT	GACTATTGCCGGTGTTGGAAGG	chr4: 20931883 20931862	22															grape-m7388
vvi_miC94-5p	AACCTTTTGGAAGGGCTGAAACCAGTCATGGTAATGGTGATAATTCAGATCGCATTTGGTGGAATAAATATTTTCTATAAATTGGCTACGAATGATGGCATGAGCGTGAAGATTATGGTCGCCTATCGAATGATGTTTGCTGCCGCTTCAATGGTTC	AAGGGCTGAAACCAGTCATGG	chr4: 21198741 21198761	21								VV-MIR006
vvi_miC95-5p	GTTGTTTTGTTGTTGATTTTATCTTGGGCTTTGGATGATCGATTGATTGATTCTTATCGATTGATAGACTCTTATTGATTGATAGATCGATCAACTATGATGTGGATGATCATCAATTCATTAAATTGCTATCAATATATAGCAAC	ATTCTTATCGATTGATAG	chr4: 22814922 22814939	18																			n_55
vvi_miC96-3p	ATGTTTTGGTCGTGCCTTGTCTTCCATTTCTATCCTTAATTCTTATCAAGAAACTTTAAATTATACTACATGGAAGGCCATGGAAGAAGAGATGCATGCTCTCCTAAACAG	GGAAGAAGAGATGCATGCTC	chr4: 23525746 23525765	20															grape-m7192
vvi_miC97-5p	CAAAGTATGATGGTGATGACATCTATGAATGGAACATAGATGGTGTAACTGAACATCAAATCTTGAATATACTTGAAGAAATGATCATGGCCTCTACAGTCTATAAAGCCAGAGGGAATTCTGACCGTCTGATCAATGTACACTTGATTTCAGGGTTCATTGGCTAGATGGTTAGAATTC CCTCCGAACAGTGATTCAAGCATCGGTCCAACCATTGAAATGTGAGTTGGTAACTTTTTC GATTCAAT	AGAGGGAATTCTGACTGTCTG	chr4: 23538785 23538805	21	vvi_miC97-3p	GATGGTTAGAATTCCCTCCGA	chr4: 23538841 23538861	21	In bold nucleotide that differ from the reference genome															c179060
vvi_miC98-3p	AAAAGAATTTGCTTTCAAAGGTGGAGATGATTTCCATAGACAAATGGAGTCAGAGGTGGTGTTTTTTGTTTTTTGTTTTTTTTTTTTTGTGTTGTTGAAATGTTGTGTATTTCATTCTTGAATAATATTGGTTGTCCTTGACCTCGTTTTAAAGTATATTGTTT	TGTCCTTGACCTCGTTTTAAAG	chr4: 3099377 3099398	22															grape-m7008
vvi_miC99_V1-5p	The authors do not report the precursor	AATAATATGAGATAAGATGAGAGA	chr4: 3621532 3621509	24	vvi_miC99_V1-3p	TTATTTCTTATCGTATTTCATATT	chr4: 3621566 3621543	24	Variants of vvi_miC99-3p and vvi_miC99-5p in the same locus						VITIS-MIR42*
vvi_miC99_V2-5p	TCATCATATCTTTTATCCTTTAATCAAATATAGGATATGATATATTATCTTATTTCTTATCGTATTTCATATTATAACTAGTCAATAATATGAGATAAGATGAGAGATAAGATAATATATCATGTCTCATATTTGGTTGATAATGAGATATGATGA	TATGAGATAAGATGAGAGATAAGA	chr4: 3621527 3621504	24	vvi_miC99_V1-3p	TTATTTCTTATCGTATTTCATATT	chr4: 3621566 3621543	24	Variants of vvi_miC99-3p and vvi_miC99-5p in the same locus																		vvi-miRn127
vvi_miC99-5p	The authors do not report the precursor	TGAGAGATAAGATAATATATCATG	chr4: 3621515 3621492	24	vvi_miC99-3p	TGATATATTATCTTATTTCTTATC	chr4: 3621578 3621555	24							VITIS-MIR7
vvi_miC100-3p	GGTCACAAATTGTGGCTGGAATTTTCTCTCTGATGGTCTTATTGTGGAGTGAAATTGCAGTGACGGTATTGTTAGT	GGAGTGAAATTGCAGTGACGG	chr4: 378859 378839	21													Vvi-miRC59		grape-m1073							Vvi-miRC59
vvi_miC101-5p	AAAAATTCACAAGGTTACGAAGAATGTGAGGAATCCTCACATTCTTCGTACCCTCCTAAATCTCCA	AAGGTTACGAAGAATGTGAG	chr4: 4040798 4040817	20									va-miR092
vvi_miC102-3p	TTCTGGGGCACATTGAAAACTGACAGAAGAGAGTGAGCACACAGAGGCAATTGTATAAGTTTATGCTTTTGCTTTTGCGTGCTCATTTCTCTTTCTGTCAGCTTCCAGTGCCGGAA	GCTCATTTCTCTTTCTGTCAGC	chr4: 5357009 5357030	22																			n_622		c88948
vvi_miC103-3p	Predicted secondary structure available at doi: 10.1111/j.1364-3703.2012.00815.x	ATAAATGCATTTTAAAGTCGTGAG	chr4: 5821694 5821717	24	vvi_miC103-5p	CATGGCTTTACAATGTGTTTATA	chr4: 5821525 5821547	24						s409712
vvi_miC104-3p	GATCGATGAAGAGAACGATGGGAATAATTAATATAATTTTAAAATTAAATTATATTAATTGTTCCCACCGCTCTCCTTATGAGC / GAGAACGATGGGAATAATTAATATAATTTTAAAATTAAATTATATTAATTGTTCCCACCGCTCTC	ATTAATTGTTCCCACCGCTCT	chr4: 6524919 6524939	21							miRC40							novel_mir_15
vvi_miC105-3p	CAGAGATGTTGCAAAGACTGGTCAATTCCGCTGGAATTTTTCCTGACTACATATTGTTGCTGGCGTTGAGCACAGATTTGTTCATCCAAGAAGATATTTCAGCAGGAATTGGACCAGAAAACTTCTTGT	TCAGCAGGAATTGGACCAGAA	chr4: 792847 792827	21												miR019	Vvi-miRC60									Vvi-miRC60
vvi_miC106a-5p	TTAACTGTGGTTAAGTTCTTTGTTAATGGAACTCAAGTACTGTTAAGTTTAGGTGAAATTTCTGACTGTGAACTTAACTGTGGTTAAGTTCTTTGCTAATGAAACTCAACTACTGTTAAGTTCATGTGAAATATCTAACTGTGAACTTAACTGTGGCTAAGTTCTTTGTTAATGGAACTCAACTACTGTTAAGT	TTAACTGTGGTTAAGTTCTTTGTT	chr15: 9839685 9839708	24	vvi_miC106a-3p	TGGAACTCAACTACTGTTAAGT	chr15: 9839857 9839878	22														vvi-New83a
vvi_miC106b-3p	TGGAACTCAACTACTGTTAAGTTCAAGTGAAATTTATGACTGTGAACTTAACTGTGGTTAAGTTCTTTGTT	TTAACTGTGGTTAAGTTCTTTGTT	chr4: 8620696 8620719	24	vvi_miC106b-5p	TGGAACTCAACTACTGTTAAGT	chr4: 8620649 8620670	22														vvi-New83b
vvi_miC106c-3p	TAATGCAACTCAACTACTGTTAAGTTCAGGTGAAATTTCGGACTGTGAACTTAATTGTGGTTAAGTTATTTGTTAATGCAACTCAACTACTGTTAAGTTCAGGTGAAATTTCTGACTGTGAACTTAACTGTGGTTAAGTTCTTTGTT	TTAACTGTGGTTAAGTTCTTTGTT	chrUn: 19716586 19716609	24	vvi_miC106c-5p	TAATGCAACTCAACTACTGTTAAGT	chrUn: 19716536 19716560	25														vvi-New83c
vvi_miC106d-5p	TTAACTGTGGTTAAGTTCTTTGTTAATACAACTCAACTACTGTTAAGTTCAGGTGAAAAAATGAACAAAGAACTTAACCACAATTAAGT	TTAACTGTGGTTAAGTTCTTTGTT	chrUn: 23462318 23462295	24	vvi_miC106d-3p	CAAAGAACTTAACCACAATTAAGT	chrUn: 23462253 23462230	24														vvi-New83d
vvi_miC107-5p	The authors do not report the precursor	GCATCAAGGGTCGAACGGCTT	chr5	21	vvi_miC107-3p	GTGGGGATTCGGAGACTTGGTGCAG	chr5	25								miR113
vvi_miC108-5p	TAATAATAAAGGAAGATGTGTACGGATGGTGTTTGGTGGTTAATATATATATATATATATATATCATTATATTAGCAATAATGGAGAGTTGTTGTGTATAGGTTTTGTTTGGTGAAAA	GGAAGATGTGTACGGATGGTGT	chr5: 10459987 10460008	22															grape-m7540
vvi_miC109a-5p	ATTTAATATAAAAAAGTTTGTCAAATATTGTGGTAGAAAATAGTCTTGAAGGGTATATTGGTCTCTTCATATCTTATATCCTCCTTATCAATTAAACAACTTATATGGAACAAAGCTTAATTTTTGGGTCCTGGGTCCAAAACACAATTGTCATGTTAGAATATTTTTTTTTGTTTATAATAGAAAAATAGAAAAATATTATGTTTTTATAAGTTTAAATAAATAAAATAAAGTGTTTAACTCTAATTTGTTTGACCCTAATTAACTGAATATAATGGTTGATTTTTTTTTTATTATCC	AAAAAGTTTGTCAAATATTG	chr18: 1001614 1001633	20								VV-MIR001a
vvi_miC109b-5p	CGTTAATATTAAATTAATTTATCAAACATCTGATTTATTTGATATTTAACATTCATTATTTTAGGGGTTATGTAAAAGTAAAACAAATAGCTTTATTTCATCATTTTGATATTTTTTAAAATTTCGGTCATGTTTGAATAAAAGTCAAAAGCCTTTTTTATAAAAAAAATTAATAAAAATTTAGTTGTTACAAAAGTGTGAAGAGACAACAGGCGTCAAAAATTAAGATTTACCCTATAAAAATTATATAATTGATGAGAGTGATATAAAATGTGAAAATATCAATATACCTTTCAAAACTATTTTGAGTATTTTCTACCACAATATTTGACAAACTTTTTTATCTTAATT	AAAAAGTTTGTCAAATATTG	chr5: 1074251 1074270	20								VV-MIR001b
vvi_miC109c-5p	ATCAGTAACATGAACGGCTCACACATATAATGGTTAGAAACAATCCTAGGCCTGCAGGCAAGCATATTACATTTGCAGTACTAAATTCATAACTGAAA	AAAAAGTTTGTCAAATATTG	chr13: 7646804 7646785	20									va-miR102
vvi_miC110-3p	TCAATATGAACTTATGAATGTATGGATCTTTTGGTACAAACATTTGAGTTTAAATTGATGTTGGTATCTTGAAAGTGCTGTTTGAAGGAAGATATTGATGGGTTTTTATTTTTGGAAATTGATTGTGTTCATGAACTACTGAATCATTGACCAGGTTCTTTTGG	AACTACTGAATCATTGACCAG	chr5: 11023623 11023603	21																	grape-m1517
vvi_miC111-3p	CACATTCTTCTTAATTTAGTTTTCATTTTTTTTATATAGACTTGTTTACCTTTAATTTTATATTTGTTCTTTTAGTTTATTTTTTATAAATAAAATAAAATAAAATAAATAAATAAATAAATAAAAAAAAAAAAGGAAGGAACAGGTGGATTAGGAGAAATGACTTTGAAAAAAAAATAATAAAAAAATAATATGGGTGGGGAGATTATAAAAAAATGAAAATGGGAGTCGGTGGAGAAGCTTA	AAAAATGAAAATGGGAGTCGGT	chr5: 12088791 12088812	22									va-miR101
vvi_miC112-3p	TGTCATTTCTATAATTTCATAAAATGTTTTAATGTGTCATTGCATCTCGGTTTATTGTGTCGAAATGTTACATTGAGATTGGAATGCATATTGGTATGAAGATTCATGGTTCTGTGTTGTGGAAATGGTTCATG	TCTGTGTTGTGGAAATGGTTCATG	chr5: 13515299 13515276	24	vvi_miC112-5p	TGTCATTTCTATAATTTCATAAA	chr5: 13515409 13515387	23														vvi-New72
vvi_miC113_V1-3p	CACATAGGATCATTTTTTACTTTTCTGTTCTTCATGCTCCTTAGTGGTCCACCCGTTACTCGGTTTTAGCATTGATGCTTGAGCCATTTTGGGAGATCTTTTGAAGGGATTTTTGGATCCATGGAGTGATTTTAGTAGCACCCTACATTGTTTTTTTTCCTTTTCCTTTTTCTTTTTCTTTCTTTTATTTTCTTGGGGGTACATTTAGCTCAGTTTAGGAGTGTTTTTATGAACCTTAACCTTGGATTATTGCATTTTGGGAGTTTGAGTTTGGTTTAATGGGGTTTTGAAAAGAATTAGGCTTTGGAGGAGATGAGGACAAGTATCCAAATAT	CTTTGGAGGAGATGAGGACAAGT	chr5: 15063458 15063436	23					Variant of vvi_miC113-3p in the same locus									novel_mir_43
vvi_miC113-3p	ACATAGGATCATTTTTTACTTTTCTGTTCTTCATGCTCCTTAGTGGTCCACCCGTTACTCGGTTTTAGCATTGATGCTTGAGCCATTTTGGGAGATCTTTTGAAGGGATTTTTGGATCCATGGAGTGATTTTAGTAGCACCCTACATTGTTTTTTTTCCTTTTCCTTTTTCTTTTTCTTTCTTTTATTTTCTTGGGGGTACATTTAGCTCAGTTTAGGAGTGTTTTTATGAACCTTAACCTTGGATTATTGCATTTTGGGAGTTTGAGTTTGGTTTAATGGGGTTTTGAAAAGAATTAGGCTTTGGAGGAGATGAGGACAAGTATCCAAATA	TTTGGAGGAGATGAGGACAAG	chr5: 15063457 15063437	21														novel_mir_19
vvi_miC114-3p	TTTTGAATTTTCACTTCAGGTTCTCTTTCCAATTTACACAATTCGCTTTCCCATGGGAGTATTGTCTTGTTAAACAAGAGAGAACCGAGGACTTTTAGAG	TTAAACAAGAGAGAACCGAGG	chr5: 15963271 15963291	21														novel_mir_18
vvi_miC115-5p	GATACAAGAAATGGGATGGAACATTATTCGTAGTGAATCTCCTGATGATCCTACAAAATGGAGTAGATTGTGGGATCCGAGTGATGTGCGTCGTGCATTTACAATGGGGG	ATGGGATGGAACATTATTCGT	chr5: 15969698 15969678	21															grape-m7843
vvi_miC116-5p	CTGTTAATATCATTTAACATAACTAAATTGAACATATTGATAACAAATTCACTTTAGTTATGTTGGATGATGTTAACA	ATCCAACATAACTAAAGTGAA	chr5: 18403307 18403327	21								VV-MIR025
vvi_miC117-3p	TCCTGTAGGCGTTAATGCTTAGGATGTTGCCCTCCTGGTACCATCTGAGCTAGTAGCCCATATGGTACCAGGAGGGCAACTGTCTGGGTTAAGG	TGGTACCAGGAGGGCAACTGTC	chr5: 20264948 20264927	21	vvi_miC117-5p	TGTTGCCCTCCTGGTACCATC	chr5: 20264986 20264966	21									Vvi-miRC68									Vvi-miRC68
vvi_miC118-5p	ATTGGGCTGCAATATGGAGGACTGTGTTCTTTTTGTGGGTTAACTGAACTACTGGACCATCCTGTTCTAAAATATGCTTTAGGATGTTGATATTGCTTTCTGCTGCAGCCCTGTAAAAACTAACATCCATGAGTTTGAACTCAGTTCCGGTACCATCTTCAGCTGCCACC	AATATGGAGGACTGTGTTCTT	chr5: 20944400 20944420	21	vvi_miC118-3p	GAACTCAGTTCCGGTACCATCTTCA	chr5: 20944526 20944550	25									Vvi-miRC63		grape-m7644							Vvi-miRC63
vvi_miC119-5p	CATAATGGCATCAAGGGTCGAACGGCTTTGCATGCTGCGGTAATTCTCAATAACAAAGGTACGTAGTGGAGGATGCACCATTTTTATTTAATGGTCGAATCACATTACAAGAGGAGACTTAATTTATTTTCTTATTTTCTTAAATCATTTTTTTTCTCTCATTTGTTGATTTTATCAGCGATGACAAAGAAGATACTGAAATGGAAACCTGCTTTAACTAAAGAATTGGATAAAAATGGGTGGTCTCCCCTTCACTTCGCTGCATATGTGGGTTGTCATCCAACAATAGTGAGGCAATTGCTAGAGAAATGTGACAGCAGTGTTGTCCACCTAGGAGTCAAAGAC	TCAAGGGTCGAACGGCTTTGC	chr5: 21653538 21653518	21												miR021	Vvi-miRC69									Vvi-miRC69
vvi_miC120a-5p	Predicted secondary structure available at doi: 10.1111/j.1364-3703.2012.00815.x	TCTTCAAGAGACGAGTTCCATGAA	chr5: 21708808 21708831	24										s1346974_1
vvi_miC120b-5p	The authors do not report the precursor	TCTTCAAGAGACGAGTTCCATGAA		24										s1346974_2
vvi_miC121-3p	ATTGTTTGCAATGATTTTAGAAAGTGTTTCTAGTCTTGCTAACACTTGAAAATTTTTATCTTTGTAGTATTAAAAATGCTAGAAACACTTCCTAGAATCACTAACAAACACA	AGAAACACTTCCTAGAATCACT	chr5: 21890337 21890358	22								VV-MIR009
vvi_miC122-3p	GAAGATTCGGCCTTGTAGGGTCGTCTTCAGTGTTAAAGTTCTGAAGCTTCACCTAGAGACCTCGAATCGAA	TCTGAAGCTTCACCTAGAGACC	chr5: 22089916 22089937	22															grape-m7670
vvi_miC123-3p	GCTCGCCGAACTGATTTGCCGACACTCACAGTAACAAGATCACGAATGGGCATTCATGTTATGTGAGTGTTCGGCAAATCAATTCCGATG	TTATGTGAGTGTTCGGCAAATC	chr5: 22090376 22090355	22								VV-MIR073	va-miR021			mIR022 / miR090	Vvi-miRC70									Vvi-miRC70
vvi_miC124-3p	Predicted secondary structure available at doi: 10.1111/j.1364-3703.2012.00815.x	TTGTCTATTACTCATTTATTT	chr5: 22564457 22564437	21										s1523093
vvi_miC125_V1-3p	AAGAGAAAAATGAACAACAGTGAGATTTTGAGAGAATAGGGAATACGGAAGAAACTTACC CAATAACTATTTCCAAATAAACTTCTCTTGTCCCCGGCAAACTTGAAAATTTTCATCCTT GTGCTTATGGAAGATAGGGAATGTAAAAACGAGAATAAGAAAATTACCTCTTAAGGCACA ATGTTGTTGAACGGACATAAAAATATTTTCACACGAAACTAAATAAATGAGTAATAGACA ACGAAACAACCAGATCACAAGAAAACAAAGAAATCAACATAATGAAAAATAATTTTGCTA GTACAGATATACAGCAAAATTATTTTTCATTATGTTGATTTTTTTGTTTTCTTGTGATCT TGTTGTTTCATTGTCTATTACTCATTTATTTGG…	TCTTGTGATCTTGTTGTTTCA	chr5: 22564566 22564586	21	vvi_miC125_V1-5p	AAACAACCAGATCACAAGAAA	chr5: 22564460 22564480	21	Variant of vvi_miC125-3p in the same locus																		vvi-miRn027
vvi_miC125-3p	TAATAGACAACGAAACAACCAGATCACAAGAAAACAAAGAAATCAACATAATGAAAAATAATTTTGCTAGTACAGATATACAGCAAAATTATTTTTCATTATGTTGATTTTTTTGTTTTCTTGTGATCTTGTTGTTTCATTGTCTATTA	TTCTTGTGATCTTGTTGTTTC	chr5: 22564565 22564585	21									va-miR016
vvi_miC126-5p	TACAAGTAGTAATGGGCCACCAAGGAACTATTGTGGAACATTGGAAGTGAACTTAAAGGCATGTGCTAAAGGGACAAAATTGAGGGTTTACAACCTTTCATTTTGTCCCCTTAGCACATGTCCTATTGAGTGCTCTTTTAGTACTCCACAGTAGTTCCCTGGTGGCCCATTGACACTCATGCA	TACAAGTAGTAATGGGCCACCAAG	chr5: 23068216 23068193	24	vvi_miC126-3p	TGGTGGCCCATTGACACTCATGCA	chr5: 23068057 23068034	24														vvi-New64
vvi_miC127-5p	AGTATTTATCTTGATTTTTATCCATTATAATCTGCACTACATTTGCAAATGGCGTTAAGAAAACGATAATCTCTTTGAATGGATTTTTTGAATTGCTTCTCCAAGAGACACAAAACATACCCTGTGATTTCCCTTTGTAAATTAAGGGCATTTATGCATATTTTTGCATTGTGTCTTGTTGGAGAAGCAATTTGAAGAATCCATTCAGAGGGAGTATCATCACTCTTATGTTAGTAGTTCCTTTAAATCATTCAAATGTTTTGTGTTTCAAAGATTTATTGGAGGATATGGCT	ATGGATTTTTTGAATTGCTTCTCC	chr5: 23698124 23698147	24	vvi_miC127-3p	AGAAGCAATTTGAAGAATCCATTC	chr5: 23698228 23698251	24							VITIS-MIR26												vvi-miRn059
vvi_miC128-5p	TTTTTCCTTATCGCCAACCTTCAAGGCAAATTGCGTCATTTCTCTTTTATTCGACGCCTTTGCTCTGCTAATTGGCTTCAAAGTATAA	AAGCCAATTAGCAGAGCAAAGG	chr5: 24082443 24082422	22								VV-MIR005
vvi_miC129-5p	AGGAACTCTTGTACGAAAAGTAGGTATCCCTTGTGTACTTGAAAACAGTTTTTAAAATTTTTACAATTTACTATTTTAAATTTTAAAAAAAAATCAAATAGTTTTTTCAAGTACACAATGTATCTACTTATTTTTTGTATAAAAGTTCCTAT	AGGAACTCTTGTACGAAAAGTAGG	chr5: 24186844 24186867	24	vvi_miC129-3p	TATTTTTTGTATAAAAGTTCCTAT	chr5: 24186972 24186995	24														vvi-New25
vvi_miC130-5p	CTACTACGTGAGCGAGTCGCTGGTCAAGCGAGCCACCAACATTGGCCGAGCCCAGCTGGTCTCGCTAGGCA	AGCGAGTCGCTGGTCAAGCG	chr5: 24544396 24544415	20															grape-m7692
vvi_miC131-5p	Predicted secondary structure available at doi: 10.1111/j.1364-3703.2012.00815.x	TAGGAGTTGTTTGATAGGATTATC	chr5: 2455949 2455926	24	vvi_miC131-3p	AATCCTATCAAACAACTCCTATTT	chr5: 2455804 2455781	24						s1222800
vvi_miC132-3p	GTTTTGCAGCTATGAATATGTTTTGTTGCTGGTCATCTAGTCATTGTTAGTCATGTTTAACGCTCATGGCAGGATGATTAGATGATCATCAACAAACACATTCAGGATAATGCATCAC / AGGGTCTAGTATGTGTTTTGCAGCTATGAATATGTTTTGTTGCTGGTCATCTAGTCATTGTTAGTCATGTTTAACGCTCATGGCAGGATGATTAGATGATCATCAACAAACACATTCAGGATAATGCATCACACCACGGCTGTGTCTCT	TTAGATGATCATCAACAAACA	chr5: 24742158 24742138	21	vvi_miC132-5p	TTTTGTTGCTGGTCATCTAGTC	chr5: 24742215 24742194	22				VV-MIR072	va-miR023		VITIS-MIR30*	miR023	Vvi-miRC71	novel_mir_21	vvi-miRC827		vvi-miRC827		n_221*	c193477	c101040 / c124028 / c129481 / c125997	Vvi-miRC71	vvi-miRn001
vvi_miC133-3p	CCCAATATTCTTGAAACTTATATATGCCTATGTTGTATGTATATGTAGTGTATGGAAACCCTTTTGCCTTTAATATCAAGTTGGCTGTTAAGTGTTCACTGGATGTTTAG	TTGGCTGTTAAGTGTTCACT	chr5: 2942022 2942041	20															grape-m7484
vvi_miC134-3p	GGCTTTAGTTCAAAAATGAAGCCTCAGTTGTCAATTGAGGCTTCAATTAAAAAATGAAACCTCACTTAGCAACTGCAGCTTCAATTTAAAAACTAAAGCCT	TGACAACTGAGGCTTCATTTTTG	chr5: 5125255 5125233	23								VV-MIR062
vvi_miC135-5p	AACTTTGCTGCAGCAGTTGCTATTGTGGTTGTAGCAATTCCAGAAAGCTTGCTGTTGTGGGTCACGTCTAGAAGAGGCTGATGGGCACTGCCATGATGCCACCACCATTTTTATTGACAAATGGGGCAACCTTTCGTTGAACCCAGATGAAAGTGGTTCGGAATAATTAATATAGAGAGTGGCCAACTGCGACAAGCCTTCTGCAATTGAATATGCTACAACCACAATATTAAGTGCAGCAACAACGAT	CAGCAGTTGCTATTGTGGTTG	chr5: 6017753 6017733	21													Vvi-miRC66									Vvi-miRC66
vvi_miC136	The authors do not report the precursor	CGGACAACATCAACCAGGATA	chr5: 6186847 6186827	21												miR042
vvi_miC137-5p	TTACACAGAGAGATGACGGTGGAGATTTGTCTCTATTGCTCTCTACCGTCTTTCTCTGTATAAGC / AGGATCCATGCCATTTCATTACACAGAGAGATGACGGTGGAGATTTGTCTCTATTGCTCTCTACCGTCTTTCTCTGTATAAGCAGATGGAGTGGATCTT	TTACACAGAGAGATGACGGTGG	chr5: 6820787 6820808	22	vvi_miC137-3p	ACCGTCTTTCTCTGTATAAGC	chr5: 6820764 6820744	21			miRC22		va-miR025		VITIS-MIR12				vvi-miRC7122	miRC129*	vvi-miRC7122	vvi-New85	n_581	c183163*	c96423* / c117421 / c122484 / c119332		vvi-miRn003
vvi_miC138-3p	GTATTGGAAGGGAAAGCATGGTCTATTAAATTAGAAAATTAGCAATGATGAATAAATTATTAGTTGTCTATATATCATTTGATATAGACCATGCATTTTCATTTCTTGTAT	TAGACCATGCATTTTCATTT	chr5: 6841977 6841996	20																			n_22
vvi_miC139a-3p	TGCCAATACTCCATTTGCGACACAACCTGCTAGACTTTGTTGTAAATTATCCTGGAGATTATGTTGTGGATGGATGAATATAC	GGAGATTATGTTGTGGATGG	chrUn: 38481794 38481813	20															grape-m5380
vvi_miC139b-3p	TGGCAAACATGCCCTCCGGAACTAGTGCCAATAGACAATACTCCACTTGCGTCACAACCTGCTATAGACTTTGTTGTAAATTATCCTGGAGATTATGTTGTGGATGGATGAATATAC	GGAGATTATGTTGTGGATGG	chr5: 7402018 740199	20															grape-m7774
vvi_miC140a-3p	TGTCTCTCTTGACTGTTCTGCACTTTTGTGTATTTTGTGAAGTTGCAGATCAGTGGAGATGAAACATG	GCAGATCAGTGGAGATGAAACATG	chr5: 8869452 8869475	24	vvi_miC140a-5p	TGTCTCTCTTGACTGTTCTGCAC	chr5: 8869408 8869430	23														vvi-New60a
vvi_miC140b-3p	TGTTTCTCTTGACTGTTCTGTGCTTTGTTTATTTTGTGGAGTAGCAGATCAGTGGAGATGAAACATG	GCAGATCAGTGGAGATGAAACATG	chr5: 8869949 8869972	24	vvi_miC140b-5p	TGTTTCTCTTGACTGTTCTGTGC	chr5: 8869906 8869928	23														vvi-New60b
vvi_miC141a-5p	Predicted secondary structure available at doi: 10.1111/j.1364-3703.2012.00815.x	TGGTCATGTGACCGTTGGAGGCTT	chr14: 5593534 5593557	24										s1410609_1
vvi_miC141b-5p	The authors do not report the precursor	TGGTCATGTGACCGTTGGAGGCTT	chr5: 9856784 9856761	24										s1410609_2
vvi_miC142-5p	ATGTTTGGTTAGTGATGGGATCAAATAAGTTATATTATTACTTATCATATCCTATGTTTAACCAAATATGG	ATGTTTGGTTAGTGATGGGAT	chr6: 10303462 10303442	21	vvi_miC142-3p	CCTATGTTTAACCAAATATGG	chr6: 10303412 10303392	21														vvi-New39
vvi_miC143-3p	AGAGGCTCCTCTTAACCAAGTAGTCGTGTTTTAAACCCGTGAGGGCCCCCTTGGGCTCAAAGCGGACAATATCTACATGGTTGGGTGTGGGTCGTTAC	ACATGGTTGGGTGTGGGTCGTTAC	chr6: 12292131 12292108	24	vvi_miC143-5p	AGAGGCTCCTCTTAACCAAGTAG	chr6: 12292205 12292183	23														vvi-New17
vvi_miC144-5p	TGTAATAGTCTACTCCCAACCTTATGGAAATTGTTTGCTAGGCTCAAAGGGTTTTCACAGCTTTAGAACGTGTCTACATGGTTAATAGGAGCCTATAGATATATAATGTTACTATATATGTATGAAATCCTTTTAACTTTGTAGATACGTTTTAAAGTTATGAAGGCCCTTGCCCTAGAGTAGACAATATCTATATGGTTGGAAGTGCTTTGTTACA	AACGTGTCTACATGGTTAATAGGA	chr6: 12629055 12629032	24	vvi_miC144-3p	CTTTTAACTTTGTAGATACGTTTT	chr6: 12628992 12628969	24																	c134535		vvi-miRn035
vvi_miC145-3p	CGGATTGCAACACCTTCGTTCTCTAGTAGAGTTACATCTTTGCAACTGCCCACGGCTAAAGGAATTGCCCCCCATTTTACACATGCTCACATCCCTTAAGCGGTTAGAGATAAGGCAATGTCCAAGTCTCTATTCACTTCCAGAGATGGGGCTGCCATCCATGCTTGAAAGGCTAGAAATCGGTGGATGCGACATTCTACAGTCTCTACCTGAGGGAATGACGTTCAACAATGCC	TCTACCTGAGGGAATGACGTT	chr6: 13592758 13592738	21														novel_mir_26
vvi_miC146-5p	TTAAGACAACTTGAGATTTCTGAATGCAGGCAGCTAGTGGTGTCACTTCCAACAGTTCCCTCCATTTGTGAAGTAAAGTTGCATGA	TTGAGATTTCTGAATGCAGGC	chr6: 13593161 13593141	21															grape-m1209
vvi_miC147-3p	AGGAGAAGAGTGGAATTCTTCCATCTTTAAGATTAAGCTATCATTATCTTCCCACACAATTGAAGCGATGTTTTGCATATTGTTCCATATTTCCCAAGGATTATGAATATGAAAAGCAGAAGTTGGTGTTATTATGGATGGCAGAAGGTTTACTGGATGACT	TTATGGATGGCAGAAGGTTTA	chr6: 13594500 13594480	21														novel_mir_27
vvi_miC148_V1-5p	The authors do not report the precursor	TGATTGTAGAAAATGTTTTTAACC	chr6: 16882491 16882514	24	vvi_miC148-3p	CTAAAAACATTTCCTAGAATCACT	chr6: 16882560 16882583	24	Variant of vvi_miC148-5p in the same locus						VITIS-MIR27
vvi_miC148-5p	CGTTTGGTATTGATTGTAGAAAATGTTTTTAACCTTTCCCCAACACTTGAATGATAACAAATTTCAAGTTTTAAAAAGACTAAAAACATTTCCTAGAATCACTACCAAACAG	TGATTGTAGAAAATGTTTTTAAC	chr6: 16882491 16882513	23									va-miR032
vvi_miC149-3p	ACTCCCATTGATTTTATTCTTTGAGAATGAAGGGCGGGTTTACTTCATGTCATGGGAATGAAATCAATGGGAGTAA	TGGGAATGAAATCAATGGGAGTAA	chr6: 17864766 17864789	24	vvi_miC149-5p	ACTCCCATTGATTTTATTCTTTGA	chr6: 17864714 17864737	24														vvi-New81
vvi_miC150-3p	TGGAAGCCAAGGTGACGCCTTTATCTGCATTTGCACCTGCACCTTATCGTATTGTGTTTGTTTGGGTTTCATCTCTGCCTTGAACTTGCTCAAAAAGGGTATATACTGGGAGAGATGATGGTGAGGAATAGGTGCAGGTGAAGGTGCAGATGAATGCCACTTTGGCTCACA	AGGTGCAGGTGAAGGTGCAGA	chr6: 17896243 17896263	21	vvi_miC150-5p	TGCATTTGCACCTGCACCTTA	chr6: 17896139 17896159	21				VV-MIR020	va-miR031*			miR025*	Vvi-miRC85		vvi-miRC530		vvi-miRC530					Vvi-miRC78	vvi-miRn114
vvi_miC151-3p	The authors do not report the precursor	ACGCATGGCGTGTGCCTCGTCTGC	chr6: 18688879 18688856	24	vvi_miC151-5p	CTAGTGGAAGGGGCATGTGCTATG	chr6: 18688770 18688747	24							VITIS-MIR14
vvi_miC151-3p	TTTTATTGTAAAATTGATGTCGTAGTATGCACACGCATGGCGTGTGCCTCGTCTGCTAGTTCCATTTTGATTATACTTATATTGTATGTTAATATATAATATATAGTATAAAACACTTTGATTTTTTTTATTTATTATAAACTAGTGGAAGGGGCATGTGCTATGCGTGTGTGTAGTATGGTGACAGTTTTGGTGATAAAG	ACGCATGGCGTGTGCCTCGTCTGC	chr6: 18688879 18688856	24	vvi_miC151_V1-5p	GGAAGGGGCATGTGCTATGCGTGT	chr6: 18688765 18688742	24	Variant of vvi_miC151-5p in the same locus																		vvi-miRn046
vvi_miC152-5p	AATATGTACCTGCTTATTAGGTCTGCTGGCAGTCCTTGTGTATCAAAGCGCCACTGCAGGCCATAGGCAGCAGAGCTGA	TGCTTATTAGGTCTGCTGGCA	chr6: 1876420 1876440	21													Vvi-miRC72									Vvi-miRC72
vvi_miC153-3p	AGGAGGGTTTGTATGAATGTAAACTGATAGCTCATCTCTTTTATGTATGAAACTCTTTCCAATTTTGTGTATACTGGAAGGGATGCTGTCTCTTTCCCTCT	ATACTGGAAGGGATGCTGTCT	chr6: 2805555 2805575	21														novel_mir_23
vvi_miC154-3p	AGACCATTTGCTACCCTCTCATAGCTAACAACCATTACTAAATTTATTTATTTTATTTTATTATATATTCTAACATTTTACAATTATATATTTCTTTTCTTTTTTAAAATGGATATTTAAATGTATATAATATTTTAATATTTATACCTATGGGCTAGCTATGAAAGGGTAGCAAACGGTC	TGGGCTAGCTATGAAAGGGTA	chr6: 3540976 3540966	21														novel_mir_24
vvi_miC155-5p	TTAAGGTGATATTTGTTTTTTTGACTGAAAAGAAAAAGTCATTATAATCAAATCGAATCTATTAGCTTTTTCTATTCAGTCAAAAAAATCACCTAAA	TTTTTTGACTGAATAGAAAAAGC	chr6: 3872038 3872016	23								VV-MIR077
vvi_miC156-3p	GATGTTAAATACATCCATCTTCTCTCTTTTTACATCCACCTTATTTGGAAAAACAGAATGAGATGGCTGTCAAAAGAGAAAATGTGGATGCATATAACAT	TCAAAAGAGAAAATGTGGATG	chr6: 4485525 4485545	21	vvi_miC156-5p	TCCATCTTCTCTCTTTTTACA	chr6: 4485469 4485489	21			miRC26		va-miR051			miR024	Vvi-miRC73		grape-m7969							Vvi-miRC73
vvi_miC157-3p	AAGAGACGAGTTACCATGAAAAAAAATAAATTTTTTTTAAAAAAAAATAATATTTTTTTAAAAAAAATCCAAAAAAAAAGAAATCCTCTAGTCACATTAAAAAAAATTAATATTTTTTTAAAAAAATTCCCAAATTATAAATATAAAAAAAATATTATTTTTTTTCATGGGAACTCATCTTAGA	ATTATTTTTTTTCATGGGAA	chr6: 4983751 4983770	20									va-miR079
vvi_miC158-3p	ATAATGGGTGTAAAACATGGCATGAAATTTGTTGCTTGGTCCTTGTCATGTGGCTTCACATCATGGCTTTATGCCATATTT	GTGGCTTCACATCATGGCTTTA	chr6: 5662548 5662569	22															grape-m1185
vvi_miC159-5p	ACTTCATGTGTGAACATTAGAGCATGACATTATGCGCACCTTTAATAAGTGTTACTAAGGTAGTACCTAAGGTACAGTCAACACTATATCAAAGGTGCACTTAATGTCATGCTCTAATGTTCACAAATGAAGTT	TGAACATTAGAGCATGACATT	chr6: 6243903 6243923	21								VV-MIR060
vvi_miC160a-3p	TGAAAATAATGTCCGATCTAATATGTCTGTGCCACATAAGCTGTAAAGTAATAAAACCGTAGTCACCAACTACGGTTTTATGACTTTACAGCTTATGTGGCACAGACATATTAGATCGGACATTATTTTCAAA	ATTAGATCGGACATTATTTTCAAA	chr6: 6514270 6514247	24	vvi_miC160a-5p	TGAAAATAATGTCCGATCTAATAT	chr6: 6514379 6514356	24	vvi_miC160a-3p in the same locus and complementary to vvi_miC160b-5p													vvi-New40a
vvi_miC160b-3p	TGAAAATAATGTCCGATCTAATATGTCTGTGCCACATAAGCTGTAAAGTCATAAAACCGTAGTTGGTGACTACGGTTTTATTACTTTACAGCTTATGTGGCACAGACATATTAGATCGGACATTATTTTCAAA	ATTAGATCGGACATTATTTTCAAA	chr6: 6514358 6514381	24	vvi_miC160b-5p	TGAAAATAATGTCCGATCTAATAT	chr6: 6514249 6514272	24	vvi_miC160b-3p in the same locus and complementary to vvi_miC160a-5p													vvi-New40b
vvi_miC161-3p	AAAAAAAATCAGTGTCATGATTTCTTGCCATACTTTTGTAGATCTCAAATATCATTATTGTACTGATATCTGCCCTGTTTTTGGACATCAAACTGATTGGATCACTTGTATTTTAGGCACGACAGTCTTGGACGCCATTAGAGAAG	GGCACGACAGTCTTGGACGCC	chr6: 6902244 6902224	21																	grape-m1577
vvi_miC162-5p	TTGTCTGAAGGGAGGATTGATCAGTGGGGCCGGTTGCAGTGTGTGTACCATGGCTGGTGTTTTAATGGCTCTGGTGACTGCAAATTCATTCCTCAGGCAC	GGAGGATTGATCAGTGGGGC	chr6: 782953 782934	20															grape-m8119
vvi_miC163-5p	TCCTTTATAATTGACTTTGGTGTTTTGGACCTTCATTTGCATTCCAATAAAAAATGTAAATAAAGGTCCAAAACATCAAAGTCAATTATAAAGGAT	TTGACTTTGGTGTTTTGGACC	chr6: 9147672 9147692	21															grape-m8013
vvi_miC164-5p	TGTTCTCATTGGATGTCAAAAGATACTTCATTATTATTCCAGAAGGCTAACCCTCTGGAATAATAATGAAGTATCTTTTGTCATGCAATGAGAACA	CATGACAAAAGATACTTCATT	chr6: 9399764 9399744	21							miRC36		va-miR073
vvi_miC165	The authors do not report the precursor	TCTGACGTATATGCTGATGGA	chr7: 11138159 11138139	21												miR102
vvi_miC166a-3p	ATTGATTTTAGTTTTTTGTGCACGTAGGTCATTTTTTTGGGAAATTAACCTTGTGGTTGGATAAGCTAGCATGAAGGAGTATGTTGAAGGCCAAAGCACAATTGGGTTGCATGTAAAGAAAAAATGGACTATGTCAAGGGACTAAACATTAAA	ATGGACTATGTCAAGGGACT	chr18: 24220736 24220755	20															grape-m3772
vvi_miC166b-3p	ATTGATTTTAGTTTTTTGTGCATGTAGGTCATCTTTTTGGGAAATTAACCTTGTAGTTGGATAAGTTAGCATGAAGGAGTATGTTGAAGACCAAAGCACAATTGGGTTGCATGTAAAGAAAAATGGACTATGTCAAGGGACTAAACTTTAAA	ATGGACTATGTCAAGGGACT	chr7: 12636397 12636416	20															grape-m8392
vvi_miC167-3p	TGGCCTTCCTAGGATTCGAACTTGGGTCCAGGCCTTAAGGCTTAGGACGTTGCCTTCCTGGTACCATCTAGGCTACTAGCTCAGATGGTACCAGGAGGGCAACTGTCTGGGTTAAGGTCCCGAGTTCGAATCCTGGTGACGTC	TAAGGTCCCGAGTTCGAATCC	chr7: 13327782 13327802	21															grape-m1235
vvi_miC168-3p	CATTAAAAGTCTTTGTAGTTGGTTCTTTTTATTTTCATTTTTTTAATGAATCCCCTGATATTCAAAATTGTGGTGTGATGGAGATGTGGGGAATTGGAGCAAGACACAATAAT	AGATGTGGGGAATTGGAGCAAG	chr7: 13415621 13415642	22															grape-m8399
vvi_miC169-3p	GTCCGCTGACATTCCATCCACCCGGATATCTCACATCCGGAACCCTGTTGCCGGATGGGAAAGGAGGACGATTCAACTTCCCCGGGTAGATATGTTCGGAT	CCGGGTAGATATGTTCGGA	chr7: 15077651 15077669	19																			n_135
vvi_miC170a-5p	AATTCCTATAATTCAAGTCTAGCCTAAACCGATAATATCAATTATTAAATTATAATATATATATTTGATCGGTTTAGACTAGACTTGAATTATAGGAATTTT	AATTCCTATAATTCAAGTCTAGCC	chr7: 15501530 15501553	24	vvi_miC170a-3p	CTAGACTTGAATTATAGGAATTTT	chr7: 15501608 15501631	24	vvi_miC170a-5p in the same locus and complementary to vvi_miC170b-3p													vvi-New15a
vvi_miC170b-5p	AATTCCTATAATTCAAGTCTAGTCTAAACCGATCAAATATATATATTATAATTTAATAATTGATATTATCGGTTTAGGCTAGACTTGAATTATAGGAATTTT	AATTCCTATAATTCAAGTCTAGTC	chr7: 15501629 15501608	24	vvi_miC170b-3p	CTAGACTTGAATTATAGGAATTTT	chr7: 15501551 15501528	24	vvi_miC170b-5p in the same locus and complementary to vvi_miC170a-3p													vvi-New15b
vvi_miC171-5p	AGAAAGTGTTTCTGGGCTTTATAACACTTTGGAAATTTTCATCATTCGAGTATTATAAAGTCCAAAAACACTTCT	AAGTGTTTCTGGGCTTTATAAC	chr7: 15865768 15865789	22																miRC103
vvi_miC172-3p	CAGTGCTATGACATGCTTCTTTTTTACGGTGATAAATCTCAATTTAGAAAACTACATAGTGATAAATTTGTGAGAGAAGGGAAACAAACACGTCTTTTAAATTTTTTTATCGTCGTCACAAT	CGTCTTTTAAATTTTTTTATC	chr7: 16412636 16412656	21									va-miR066
vvi_miC173_V1-5p	CATCTTCTGGAAGCAATCAGGAGACTTGTAGAAATTCGCAGTAACTCCACGTTTCATAATCTGTCTCAAATTCTCAAGTTCTTTAAAGAACGTTGAAGATGGGTGAGATGAGATTTTTGGCTCTGTTTATTCTTCTCTTTTGAGTACTGATTTTTCAAGCAGCAGAGGCTAGAATCAGAAGGTATAATTGGGAGGTGAAGTTGAGTACAAGTCTCCTGATTGCTTCCAGAAGATGG	AAGCAATCAGGAGACTTGTAG	chr7: 17201656 17201676	21					Variant of vvi_miC173-5p in the same locus									novel_mir_44
vvi_miC173-5p	AACCATCTTCTGGAAGCAATCAGGAGACTTGTAGAAATTCGCAGTAACTCCACGTTTCATAATCTGTCTCAAATTCTCAAGTTCTTTAAAGAACGTTGAAGATGGGTGAGATGAGATTTTTGGCTCTGTTTATTCTTCTCTTTTGAGTACTGATTTTTCAAGCAGCAGAGGCTAGAATCAGAAGGTATAATTGGGAGGTGAAGTTGAGTACAAGTCTCCTGATTGCTTCCAGAAGATGGTTA / AGAACGTTGAAGATGATAAAGAGGTGATAACCATCTTCTGGAAGCAATCAGGAGACTTGT AGAAATTCGCAGTAACTCCACGTTTCATAATCTGTCTCAAATTCTCAAGTTCTTTAAAGA ACGTTGAAGATGGGTGAGATGAGATTTTTGGC…	TGGAAGCAATCAGGAGACTTG	chr7: 17201653 17201673	21	vvi_miC173-3p	AGTCTCCTGATTGCTTCCAGA	chr7: 17201671 17201651	21										novel_mir_29									vvi-miRn116
vvi_miC174-5p	GTCAAGAGTGCTATAGTAAAAGTCAGTTTTACTGTTCACTCCCTATATACTATACTCGTGAGTGAATAGTGAATAGTAAAACCGACTTTTATTGTAGCACTTTTGA	TACAATAAAAGTCGGTTTTAC	chr7: 19295461 19295441	21								VV-MIR050
vvi_miC175_V1-5p	GGGTTGAGAGGAATGTTGTCTGGCTCGAGGTATCATTTATTTTTCTTTTCTTTTCTTCGGGTTTTTGTTGGATTGAATTTAACCCCCAAATGAAAGAAAGAAAGAAGAAGAAATATAAGGTGATGAGTGATTCTCGGACCAGGCTTCATTCCCCTCAACCG	ATGTTGTCTGGCTCGAGGTATC	chr7: 19450186 19450207	22	vvi_miC175-3p	TTCTCGGACCAGGCTTCATTC	chr7: 19450304 19450324	21	Variant of vvi_miC175-5p in the same locus				va-miR018*			miR061*		novel_mir_30
vvi_miC175-5p	CTTGAGTGATTTTATGTATACCTCAAAAAGCTTCGGACCAGGCTTCATTCCCCTCAACACACTTCCAATAATGCAATACTAGCACCCTCCTCCTCCTCTTCTTCATCTTCCCCGCGTGAAGGTTGGGTTGAGAGGAATGTTGTCTGGCTCGAGGTATCATTTATT	GGAATGTTGTCTGGCTCGAGGT	chr7: 19450183 19450204	21												miR108	Vvi-miRC87
vvi_miC176-3p	TAAAAGTAACCTATTGACATCGTCTAACATAATTAAAGTGAACTTATTGATAACAAGTTC ACTTTAGTTATGTTGGACGATGTCAACAGGTTACTTTTAGTTGAATAGAAAAATCCAAATATTTTGGTTTTTTTTATTCAGCCAAAAAAACAAACACTA	CGATGTCAACAAGTTACTTTTAGT	chr7: 2147615 2147638	24	vvi_miC176-5p	TAAAAGTAACCTATTGACATCGCC	chr7: 2147538 2147559	22	In bold nucleotide that differ from the reference genome																c107988
vvi_miC177-3p	GACCTGGTTCAACATCGTAGCTTTTGGATGCATGTTTGGGAATTGAGAATCTTTCTAATCTTGAAATCCTTGGATGAAGGACATGATTAAAGAGCTCATGTGGGCAAAGGT	CATGATTAAAGAGCTCATGT	chr7: 2176825 2176806	20															grape-m8476
vvi_miC178_V1-3p	ACACTTATTAGAATCACCGTTAAATGTGTTCTTAAAATATGTTTGACTGTAATTTTAGGAAGCCTTTCTAACATTTTTAACGTTTTAAATTTTTTATCATTCAAGTATTACAAATATTATAAATATTTTTCAAAATCAGTTTCAACACACTCTTAATCAAACAATAAAACTACATAGTCT AAATAAACTTTATTATTTTGTTGCATATTTTAAAAGAAACCTTGTTATAAATATCGGAAA CTTCACTTGT	TTTGACTGTGATTTTAGGAAGCCT	chr7: 2558411 2558434	24	vvi_miC178-5p	ACTTATTAGAATCACCGTTAAATG	chr7: 2558372 2558395	24	In bold nucleotide that differ from the reference genome																c135679
vvi_miC178-3p	GTTTTTAAGTTTTATAACACTGAAACTTGTATATTTCAAATATAATAAAATATTAAAAAC ACTTATTAGAATCACCGTTAAATGTGTTCTTAAAATATGTTTGACTGTAATTTTAGGAAGCCTTTCTAACATTTTTAACGTTT	TTTGACTGTAATTTTAGGAAGCCT	chr7: 2558411 2558434	24	vvi_miC178-5p	ACTTATTAGAATCACCGTTAAATG	chr7: 2558372 2558395	24																	c132902
vvi_miC179-5p	CCCTTAAGTTTGAAATTTCATCATGCACCTCCCTTATTTTAAATAAGAGGAGAGATGAGTGAAAATAAGAAATGAAAAGGATAAGGAAGGTATTTGATGAAATTTCAAACCTATGGAGGT	TGAAATTTCATCATGCACCTC	chr7: 3976581 3976601	21	vvi_miC179-3p	GGTATTTGATGAAATTTCAAA	chr7: 3976659 3976679	21				VV-MIR080
vvi_miC180-3p	Predicted secondary structure available at doi: 10.1111/j.1365-313X.2010.04208.x	TGGTTCAGAAATGCATAGGAC	chr7: 4633008 4632988	21							miRC41
vvi_miC181-5p	CAATAGCCAAAGGGTATGGGCCCTAAGGCAGGAGGGTATAAATCCAAATGTCAGTTCCTTGTATGACAACAACATTTTGAAACAAAAGGAACTTGTTCTGTCCTGTTCCCATCATCAGAGAGAATCTAAAGGAAAGGTGGTCCCTCTACAGCCTTAGAAGATCCATACATCTTCAACAAAAT	AGATGTATGGATCTTCTAAGGCT	chr7: 5947615 5947593	23								VV-MIR017
vvi_miC182-3p	CAGATAATCAGATCCCTGAAATGGTGTCCACAGAGCAATATCTTGGCTTGTGGATGAAGTAGAGGCTTGCTTAGGCTGCAGTGTGCCGCAGAAGGATTTATGGTGGCACAACATCCTTACTTGGAAATAAGAGAATTTTACCTTTTTACAGGAACATCTGCCACAGACATGTGATTCTCAATGCAGCCTTACTGGCTCCACTGGCTCCATATACAACACTTGGTCTCGTATGCTATTTGCATCAGTCTCTAAATTTTTTACTGGACTGTAGAAGCATACCAAATAGCCCATATACTGCTCTGTGGACATTGTTTCAGGGCTCTGATTATCT	TGTGGACATTGTTTCAGGGCT	chr7: 6411785 6411805	21	vvi_miC182-5p	CCCTGAAATGGTGTCCACAGA	chr7: 6411498 6411518	21										novel_mir_28
vvi_miC183-3p	GTTGAAGCCTCAATTGTCAGCCGAGGCTTCATTTTTTAACTGAAGTCGTAATTGGCAATTGAGGCTTCATTTTTGAACTGCAACCTCAATTGTCAGCTGAGGCTTCATTTTTTAACTGAAGTCGTAATTGGCAATTGAGGCTTCATTTTT	ATTGGCAATTGAGGCTTCATTTTT	chr7: 7266622 7266599	24	vvi_miC183-5p	GTTGAAGCCTCAATTGTCAGCCG	chr7: 7266748 7266726	23														vvi-New42
vvi_miC184-3p	AACTTATACTAAAGGTGTCTCTTAAAGAGACACCTTCCAAAATTTCACAAAATTGAATTTATATTAAAGGTGTCTCTTATTGAATTTATACTAAAGGTGTTTCTTCAAGAGACACCTTTAATATAAAAGAGAAACCTTTAGTATAAATTGGATTTTGTTGAATTATAGAAGGGTGTTTCTTGAAGAGACACTTTTAGTATAAATTCA	AGAGACACTTTTAGTATAAATTCA	chr7: 9677511 9677488	24	vvi_miC184-5p	AACTTATACTAAAGGTGTCTCTTA	chr7: 9677694 9677671	24														vvi-New24
vvi_miC185-3p	GTGTGGGTAGCCTCTTCATACGATGTTCCCTTGATGATTTGAAAACCATCAATGCATTTCAAATGAAGGGGTCCCATCATTGACAAAACACCTTTTTTTTTTTTAATATTTATTAAAATATGATTTTAAAATTAAATCTATGATATTTTTTAAGACATTAATTAAAAATAATATTTTTAA GAAGATAATTTTAATTTAAATATTGAAGATATATTTTCAAA	TTTAATTTAAATATTGAAGAT	chr8: 11943057 11943077	21									va-miR010
vvi_miC186_V1-5p	TTCTAAGAAAAGGTGTAGATTAAGAGGAGGGGGACTGAATCACTAACTATGATTTCCTTATTTCATGATTCAGTCCCTCTCCTCTTGATCTACACCTTTTTTTGGAA	GTGTAGATTAAGAGGAGGGGG	chr8: 12332720 12332700	21	vvi_miC186_V1-3p	CCTCTCCTCTTGATCTACACC	chr8: 12332657 12332637	21	Variant of vvi_miC186-5p in the same locus																		vvi-miRn014.1
vvi_miC186_V2-5p	TTCTAAGAAAAGGTGTAGATTAAGAGGAGGGGGACTGAATCACTAACTATGATTTCCTTATTTCATGATTCAGTCCCTCTCCTCTTGATCTACACCTTTTTTTGGAA	TGTAGATTAAGAGGAGGGGGA	chr8: 12332719 12332699	21	vvi_miC186_V2-3p	CTCTCCTCTTGATCTACACCT	chr8: 12332656 12332636	21	Variant of vvi_miC186-5p in the same locus																		vvi-miRn014.2
vvi_miC186-5p	Predicted secondary structure available at doi: 10.1111/j.1365-313X.2010.04208.x	GTAGATTAAGAGGAGGGGGAC	chr8: 12332718 12332698	21							miRC33
vvi_miC187a-3p	TTACTAAGAGTGTGGTTTGTAGTAATTATAGAAAAAACTTCTACTCTTCTTAACATTTGAATGATAATTTTTTTTCAGTATTAAAAATATTAAAAATATTTTCTAAAATCACTATCAAACGAACTCTAATCATA	TAAAATCACTATCAAACGAA	chr10: 2772985 2773004	20									va-miR056-1
vvi_miC187b-3p	ATTTTTACAATGCGTTTAGTAATGATTTTATAAGACGTTTATAAGATTTTTAACACTTGAATTATATAATTTTTTTAAACATTTAAAAAGTTAGAAACACTTTATAAAATCACTATCAAACGAACTTTTAATATC	TAAAATCACTATCAAACGAA	chr11: 1245886 1246019	20									va-miR056-2
vvi_miC187c-3p	TCATTAAAAGTGCGTTTGATAATAATTTTAGTAAATGTTTTTAGTATTTTTAATACATAATTTTTTTATTTTTCAAGTATTATAAAAGTTAGAAATATTTCATAAAATCACTATCAAACGAACCCAATATCCT	TAAAATCACTATCAAACGAA	chr14: 20754073 20754092	20									va-miR056-3
vvi_miC187d-3p	GTATTTAAAATTCGTTTGATAGTGATTTTAAGAGACGTTTAATTTTTTAAGTATTAAAAAAATTAGAAAGATTTTCTAAAATCATCGTCAAATACACTTTTATTTTTGTTAGTATTGTTTTATTTTACTAAGTGAAAAGTCTATTAAATTCTCCAAATTTTCAAAACTAATTTTTAAAAGTTTATAAAATATTAATTTTTATAAGAAAATATTTTCAACGAACGGTTTTTAACTCGTTTCAAAATCACTTTTACAA	TAAAATCACTATCAAACGAA	chr16: 16220993 16221012	20									va-miR056-4
vvi_miC187e-3p	TATTATAGAGTTCGTTTGATAGTGATTTTAGAAAACTTTTTTAATATTTCTAATACTTTTAAATTTTTAATAATTCAAATGTTAAAAATATTATAAACATTTCCTAAAATCACCTACCACTTTGATTTTTAATTAAT	TAAAATCACTATCAAACGAA	chr8: 12497361 12497342	20									va-miR056-5
vvi_miC188-5p	AATATTTTCGGAATTTTTATGGTGGAAAATTAATTATTTTCGAATATTGAAAATTATTAGAATTGTTGGAAAATTCCGAAAGTGTGGT	AATATTTTCGGAATTTTTATGGTG	chr8: 13484540 13484517	24	vvi_miC188-3p	TTGGAAAATTCCGAAAGTGTGGT	chr8: 13484475 13484453	23														vvi-New10
vvi_miC189-5p	The authors do not report the precursor	ATTTTTCACGTGGGACAATTC	chr8: 14079605 14079625	21	vvi_miC189-3p	ATTCTCTCATATGAAAAGCAG	chr8: 14079658 14079678	21								miR072
vvi_miC190-5p	TATACATGTGCTGCGGGTGGAAAAGGATTAGGCTACACGCTTAATCATCATGCTGTTCCTTCATTAATGCAATTATGAAGGTTTGTAGGCTCTGCTTTTCATATGAGAGAATCCACAAAATTTAGACTCATAACCACATCTTAGGAATTGTCCCACGTGAAAAATGGAGTACATAAACCTTCATAACTATATTTATGAAGTAGCACGACATCAATTAAACCTGTAGCCTCATCCTTTTCCATCGGCAGCACATGCATAG	CTGCGGGTGGAAAAGGATTAGGC	chr8: 14079759 14079737	23	vvi_miC190-3p	CTCATCCTTTTCCATCGGCAGCA	chr8: 14079542 14079520	23								miR109	Vvi-miRC89
vvi_miC191-5p	GAGAAAGGGACCGAGGGAGAGAGCGAGAGGAGGAAACGGAGGAAACCCCTTTCAACTCGGCGTATAAAGGGAGTGATTGAGAGGGGAGAGATCACCGATCAGTGTCTGTGTGTGGATGTGCATTGGATCCTTCGCCGAGGGTGGGTTTGAAAGGTTCCACCTTCACCACCTGCTCTCACTCTGTCCCTCAGTCTGTTTCTCT / CATTTTATCTTCCTAAATTCTGGAGAGAAAGGGACCGAGGGAGAGAGCGAGAGGAGGAAACGGAGGAAACCCCTTTCAACTCGGCGTATAAAGGGAGTGATTGAGAGGGGAGAGATCACCGATCAGTGTCTGTGTGTGGATGTGCATTGGATCCTTCGCCGAGGGTGGGTTTGAAAGGTTCCACCTTCACCACC…	CCGAGGGAGAGAGCGAGAGGA	chr8: 14594070 14594050	21	vvi_miC191-3p	CTCTCACTCTGTCCCTCAGTC	chr8: 14593908 14593888	21								miR115		novel_mir_33	grape-m8937						c145512_5p
vvi_miC192-5p	ATTGTTTTCGTCAATGTAACCTTGGGAGCTGAACTCCGGTATGGCCGGAATGGTTCATAATCATTTAGGCTATATATGATGAGTACGTTGCTGGCTAATGAAGAGAGGACTCCTTTAATGCTTTTCAACCATCTTCAAGTTTGCAGCTTAGCTTCGGTGCTAAATCATGGGTCCTGCTGCCAAGGTTACATTGACGAGAGTAGTG	TCAATGTAACCTTGGGAGCTG	chr8: 15176129 15176109	21															grape-m8943
vvi_miC193-3p	TTGCGAGTCATAATTCTCGCCTCCCTATTCTCCAGTCCAAACTCATCAGGTCCAAGATCTCTGGTGGGTCCAATCTGCCTGATGGACATCCAAGGATCATGAAATCTGTCATCTCTATCATTGTCCCGTAAGGATATAGGCTTAATCATGGGTGAACCATTGAAATCCTGCCAATGGGTTGCCAAACTGGCGTGCTCCATCTCAAACAATCTCCCCAGAGAGAATCTTCCTCGTTCTATCGACTCTAACAAACTATTGCCCTTGTGGGAGGAAGATAGCGAGGAACATGAAGCAA	TGGGAGGAAGATAGCGAGGAA	chr8: 16138775 16138755	21														novel_mir_34
vvi_miC194-3p	TAATAGTAAGAAACTCTTATACAAGAATTAGGAGTGTAACTTAGTTGGGTTAATCCAACCCAATCTAAACTCAACTTGATTTTTGGATGAGCTTACGCAATC	TCAACTTGATTTTTGGATGAG	chr8: 16806936 16806956	21									va-miR050
vvi_miC195-3p	GGACGAAATGAGATCGGCGCCCTTCGTTTTTTAGAGGAAGAGAAGTGTTCCAAAATTTTAACAAACATTGCTCTTGTAGTTCGTTTGTTGAAATTTATGAACATATCCATTTACACGAGGAATTTCTGTGGTACTTTTTATTGAAATGCAGCTCTACGTTTATTCTTCATTGTCAAGCTTTACTTAGCTTTGTTTAAACGGAGATTGTTTGACTTTTTTCTGCT	TAAACGGAGATTGTTTGACT	chr8: 17310792 17310773	20															grape-m8960
vvi_miC196-3p	ACTTTAAAACGTGTCTACATGGTTAAGTGGAGTTCATACATATATAGTATCAAGAATAGTTTCCTTTATTTGATTTGAAGAATAAGTTCTTGACACTATATATGTGGCGAATTTCTCTTTATCATGTAGACATGTTTTAAAGTCA	ATTTCTCTTTATCATGTAGACATG	chr8: 18659098 18659121	24	vvi_miC196-5p	TGTCTACATGGTTAAGAGGAGTTC	chr8: 18658999 18659022	24	In bold nucleotide that differ from the reference genome																c149778
vvi_miC197_V1-5p	GGCATTTGTCTGCAACTGCAGCTGCACCTCTCTCTCTGTCCTTCTAGGGTTTAGTTACAGGCTTATCATCCAAGAGAAGGATAATTAGGAACACCAGAAAAAGAAAAAGGAAAAACACTAGGGACTGATAAAAGGTGCAGGTGCAAATGCAGATAAATGAT	TGCATTTGCACCTGCACCTTT	chr8: 18999877 18999857	21	vvi_miC197-3p	AGGTGCAGCTGCAGTTGCAGA	chr8: 18999755 18999735	21	Variant of vvi_miC197-5p in the same locus			VV-MIR066				miR030 / miR095
vvi_miC197-5p	GTATCATTTATCTGCATTTGCACCTGCACCTTTTATCAGTCCCTAGTGTTTTTCCTTTTTCTTTTTCTGGTGTTCCTAATTATCCTTCTCTTGGATGATAAGCCTGTAACTAAACCCTAGAAGGACAGAGAGAGAGGTGCAGCTGCAGTTGCAGACAAATGCCAT	TCTGCATTTGCACCTGCACCT	chr8: 18999879 18999859	21									va-miR043						vvi-miRC530a		vvi-miRC530b
vvi_miC198a-5p	CACATATAATTTTTTCCCGTCAAGCAACTTATCAAGCATTAATAGCAGCAGCTTTCTTCCACCACCTTGCAAGAAAGTATATTGCCAAACTTGCAGAAAATGTCTTGAAGGGAAAAATTATACGTGTC	CACATATAATTTTTTCCCGTCA	chr8: 19904322 19904301	22	vvi_miC198a-3p	AAGGGAAAAATTATACGTGTC	chr8: 19904215 19904195	21														vvi-New47a
vvi_miC198b_V1-5p	GTCTTTCCTCTCACCTTTCTTGACAAATTTAGACACATATAATTTTTTCCCGTCAAGCAACTTATCAAGCATTAATAGCAGCAGCTTTCTTCCACCACCTTGCAAGAGAGTATATTGCCAAACTTGCAGAAAATGTCTTGAAGGGGAAAAATTATACGTGTCCAAATGTGTAAGTGAATAATCTGGGTGAAGAT	CACATATAATTTTTTCCCGTC	chr8: 19949297 19949277	21	vvi_miC198b_V1-3p	AGGGGAAAAATTATACGTGTC	chr8: 19949190 19949161	21	Variants of vvi_miC198b in the same locus																		vvi-miRn061
vvi_miC198b-5p	CACATATAATTTTTTCCCGTCAAGCAACTTATCAAGCATTAATAGCAGCAGCTTTCTTCCACCACCTTGCAAGAGAGTATATTGCCAAACTTGCAGAAAATGTCTTGAAGGGGAAAAATTATACGTGTC / CTTGACAAATTTAGACACATATAATTTTTTCCCGTCAAGCAACTTATCAAGCATTAATAGCAGCAGCTTTCTTCCACCACCTTGCAAGAGAGTATATTGCCAAACTTGCAGAAAATGTCTTGAAGGGGAAAAATTATACGTGTCCAAATGTGTAAG	CACATATAATTTTTTCCCGTCA	chr8: 19949297 19949276	22	vvi_miC198b-3p	AAGGGGAAAAATTATACGTGTC	chr8: 19949190 19949160	22														vvi-New47b	n_579
vvi_miC199-5p	CTTAAGATCGTCGTAGTGGCTGCGACAGCTCCGTGGAGTGAGGGGGCGTTGGAGCGTGGCCTCTACACTTCCATGGTGAAGATGTCCAACCGCTTGAGT	TCGTAGTGGCTGCGACAGCTCC	chr8: 21905804 21905783	22															grape-m8993		grape-m1738
vvi_miC200-5p	The authors do not report the precursor	CATCGTCCGAGGCTATGGCGG	chr8: 21906085 21906065	21	vvi_miC200-3p	ACCATCGCCGCCGACGATGCG	chr8: 21905847 21905827	21								miR031
vvi_miC201-5p	CTTTTTTCTTAGATGATGTATGGAATGAAATTAGGGTTTATATTTCCTTCCATCGTTATTAGGTTAAAAGA / TTCTTAGATGATGTATGGAATGAAATTAGGGTTTATATTTCCTTCCATCGTTATTAGGTT AAA	AGATGATGTATGGAATGAAATT	chr8: 22256990 22257011	22	vvi_miC201-3p	TTTCCTTCCATCGTTATTAGG	chr8: 22257022 22257042	21				VV-MIR016				miR094		novel_mir_45									vvi-miRn134
vvi_miC202-3p	CGTGCTTCACATGTATTTGAGGGAAAGCAAAACAAAGGTGAATACATCACGCCATGCCTTTCTTCTTTGTTTTGTTTTCCCTCAAAAACATGTAAAATAAGCACTATACTTATTTCACCTCCGCCACCTTCTCTCCAGAGCTCAGAAACAGGAACTAGAAAAATCAACCCAACCCTACATCACACAATATTGGTCTTTTCTTACTTCCCTTTGTTTTCTCTCAAATATATGTGAAACAGGT / GTGAAGGTGAATTGGGTAGAGTGGTTAGGCGTGCTTCACATGTATTTGAGGGAAAGCAAAACAAAGGTGAATACATCACGCCATGCCTTTCTTCTTTGTTTTGTTTTCCCTCAAAAACATGTAAAATAAGCACTATACTTATTTCACCTCCGC	ATGTATTTGAGGGAAAGCAAA	chr8: 22308239 22308259	21	vvi_miC202-5p	TGTTTTCCCTCAAAAACATGT	chr8: 22308301 22308321	21								miR062	Vvi-miRC88						n_306
vvi_miC202-3p	Predicted secondary structure available at doi: 10.1111/j.1364-3703.2012.00815.x	ATGTATTTGAGGGAAAGCAAA	chr8: 22308239 22308259	21	vvi_miC202_V1-5p	TTTGTTTTCCCTCAAAAACATG	chr8: 22308299 22308320	22	Variant of vvi_miC202-5p in the same locus					s466917
vvi_miC203-3p	TTAGAGCTGGGATTCTTAGAGATCATGGGTTTGTGGAGGTGGGATGTCAAAGTATTATTAATTTGGTATGCATGATTGGCACATTATCTAACAACTTAAGCTTTTGG	TTGGCACATTATCTAACAACT	chr8: 2706419 2706439	21									va-miR012
vvi_miC204-3p	CATAAAAGTCCTAATTATGCCCTGTTTTATAATTTTTCACAAACAATGAATGAGTAATAAAAAGTTAATTTAAGAAAGTCCTAAGAGAAAAAGTACTAATTGTGGTGTTTCTCTTTCACTATTAAAATTTACTAATAAACAGACATAATTAAATATGAATTT	ATAAAACAGGGCATAATTAG	chr8: 3238984 3238965	20								VV-MIR022	va-miR084
vvi_miC205-5p	AATCCTTCGGTGGACTACTCTTTTAACGGTGGATGGTCCGTCATAATGGTATACATAACATTATGGCAAGAGCATCCACCGTTAAAAGAGTAGTCCATCGGGAGGAT	TGGACTACTCTTTTAACGGTG	chr8: 3507457 3507437	21	vvi_miC205-3p	CCGTTAAAAGAGTAGTCCACC	chr8: 3507389 3507369	21				VV-MIR067
vvi_miC206-3p	TTGAAACCACAATTGTTAACTGAGATTTCATTTTTGAATTGAAACCTCAATTGGCAATTGAGGCTTCATTT	CAATTGGCAATTGAGGCTTCATTT	chr8: 3836719 3836396	24	vvi_miC206-5p	TTGAAACCACAATTGTTAACTGAG	chr8: 3836766 3836743	24														vvi-New46
vvi_miC207-5p	AGTGCGTTTGAGAGTGATTTTAGAAAACATTTATAGTATTTTCAACATTTAAATGATAAAAAATTTCAAATGTTAAAAAGATTAAAAACGTTTCCTAGAATTATTTTCAAACGGACTAT	AGTGCGTTTGAGAGTGATTTTAGA	chr8: 8617160 8617183	24	vvi_miC207-3p	TAGAATTATTTTCAAACGGACTAT	chr8: 8617255 8617278	24														vvi-New31
vvi_miC208-5p	GAGGGTGATTCTAAAAAACGTTTTTAATATTTCTAACACTTGAATGATAAAATTTTTTAAGTATTAGAAATATTAAAAACGCTTCCTAGAATTACTATTA	CTAGGAAGCGTTTTTAATATT	chr8: 910626 910666	21									va-miR063
vvi_miC209-3p	GAAGCATTTTCTCTGTTCCGTAACAAGGTTGGTGAGAATGTCTTGAATTCACATCTGGATATAAAAAGACTTGCTAAGATTGTTGTTGAAGAATGAAAAGGATTG	TAAGATTGTTGTTGAAGAATG	chr9: 12277817 12277797	21															grape-m1398
vvi_miC210-3p	Predicted secondary structure available at doi: 10.1111/j.1364-3703.2012.00815.x	GACCAGTGAGATAGTCCTCTA	chr9: 13656564 13656584	21	vvi_miC210-5p	GGGGATTATCTCACTGGTCCT	chr9: 13656416 13656436	21						s935122
vvi_miC211-5p	GAAGAAAAGACGTTTCCCACAGACGGCGCCAATGTTGATGGCAAAATTCCCCTGCTGCAATAGTGATTACCAACAGCAGAATCTCGATCAACACATTACAGTGAATCCTCCTTCCTCTTGCAAAAAAGATGTCCGGACAGGTTGTCCGGGCATATCCTCCGATGCCTAAGTTAGTGTTTTGGAAGCTGTTGGGAAATAGGGTTTTCCTT	CGTTTCCCACAGACGGCGCCA	chr9: 14373940 143739420	21															grape-m9381
vvi_miC212a-5p	The authors do not report the precursor	GAAGAAGAAGAAGTAGAGTGA	chr9: 15353297 15353317	21												miR074a
vvi_miC212b-5p	The authors do not report the precursor	GAAGAAGAAGAAGTAGAGTGA	chr9: 19795242 19795222	21												miR074b
vvi_miC213-5p	TTGATCCAAATGAGATTGAAGACTTTGATGTAATCCTTCATACTTAATGACTATGAATAGTAGCTTATATTAAGTCTCAGTTTAAATTTATGTCATTTAATGCTCCTTCATTATGTTTGACTTAGGTTATTTGTGCTCGCATGGAGGCAACACGATGTAAATCACTGATGCATAAAGTC ATCTTAATAGTCTTATTGCATTAT	TGAGATTGAAGACTTTGATGT	chr9: 16109687 16109707	21															grape-m9163
vvi_miC214-5p	CAACTCGTCTTGTATATATACTGTATCAGCCAATAGTTCATCGAGGCTCAAAATAAGGGTTTTCTTTTTGTCATTAAGGATTCAATTTTGTGAACACTATCTAGTTTCGAGTCTCATGAATTGTTGGCTGATATTGTCTATTCATTGAGTTGAAGTAA	TCAGCCAATAGTTCATCGAGGC	chr9: 18443559 18443538	22	vvi_miC214-3p	CTCATGAATTGTTGGCTGATA	chr9: 18443472 18443452	21											grape-m9410
vvi_miC215-3p	TATCATATCTTATGTTTGGTTAGTGATGGATATGATAAGTTATCCAATCACTTATCATATCCTATGTTTAACCAAACATGGGATAAGATAAG	CCAAACATGGGATAAGATAAG	chr9: 18958731 18958751	21	vvi_miC215-5p	TATCATATCTTATGTTTGGTT	chr9: 18958660 18958680	21														vvi-New50
vvi_miC216-5p	TTGCTGAGAGAGTCGTCTGCCTCTTGTGAAAGATTCAGAGGCAGATGACCCTATCAGAAATG / TTTCTTCTCATTGCTGAGAGAGTCGTCTGCCTCTTGTGAAAGATTCAGAGGCAGATGACCCTATCAGAAATGAAAAGGAAG	TTGCTGAGAGAGTCGTCTGCC	chr9: 19105605 19105585	21	vvi_miC216-3p	CAGATGACCCTATCAGAAATG	chr9: 19105564 19105544	21					va-miR013					novel_mir_36				vvi-New89		c242172	c162066 / c157736
vvi_miC217-5p	The authors do not report the precursor	TTTTAATTTTGATATGGCAAGTCA	chr9: 21822427 21822450	24	vvi_miC217-3p	ATACTTTACTTGTCATGTCAAAGT	chr9: 21822531 21822554	24	vvi_miC217-5p in tandem with vvi_miC218-5p						VITIS-MIR19
vvi_miC217-5p	CATTACCCTCTAAGTTTAACTTTATTATTATTATTATTATGGTTGTTGTCATTAACCGATCTTATGAAATGATTTTTTTTTTTTTTAATTTTGATATGGCAAGTCAAGTATATTTGCATCAAATTTGTCATCATCATTTCATATCTAATGAGATTAAAATAAAAAGTTGACAAAGATGATGTGATTATACTTTACTTGTCATGTCAAAGTTAAAAAAATCATATCATATAAATTATAATTGATTGGTTGAGGCAACAATCATAAAAAAATATGGATTAAGACTTAAAAAAAGTAATG	TTTTAATTTTGATATGGCAAGTCA	chr9: 21822427 21822450	24	vvi_miC217_V1-3p	ACAAAGATGATGTGATTATACTTT	chr9: 21822514 21822537	24	Variant of vvi_miC217-3p in the same locus. vvi_miC217_V1-3p in tandem with vvi_miC218-3p																		vvi-miRn015.1
vvi_miC218-5p	CATTACCCTCTAAGTTTAACTTTATTATTATTATTATTATGGTTGTTGTCATTAACCGATCTTATGAAATGATTTTTTTTTTTTTTAATTTTGATATGGCAAGTCAAGTATATTTGCATCAAATTTGTCATCATCATTTCATATCTAATGAGATTAAAATAAAAAGTTGACAAAGATGATGTGATTATACTTTACTTGTCATGTCAAAGTTAAAAAAATCATATCATATAAATTATAATTGATTGGTTGAGGCAACAATCATAAAAAAATATGGATTAAGACTTAAAAAAAGTAATG	AGTATATTTGCATCAAATTTGTCA	chr9: 21822451 21822474	24	vvi_miC218-3p	ACTTGTCATGTCAAAGTTAAAAAA	chr9: 21822538 21822561	24	vvi_miC218-3p in tandem with vvi_miC217_V1-3p														n_471				vvi-miRn015.2
vvi_miC219-3p	CTGACCATATCTCATTTTGGATCCGCCCATTGGGTACGATACACTCAATACAACAGTTAATTTTTCTATCAAAATTAACTTCTATATTGAGCTTATGGTACCCAATGGGCGGATCCAAAATGAGATATGGTCAC	AATGGGCGGATCCAAAATGAG	chr9: 22644990 22644970	21								VV-MIR008
vvi_miC220-3p	TCTGTTTGCTTGCTGAGAAACTGGGGGGAAAATGAAAGAAAACTATAAATCTTTTCAACATGTTCGAGTTGGAGTGGCAACTGTGACAATCCGGATTTTTTTTTTCTTCTTCTCACCGTTTCTCAGCCAACAAATGG / GTCCTCTGTTTGCTTGCTGAGAAACTGGGGGGAAAATGAAAGAAAACTATAAATCTTTTCAACATGTTCGAGTTGGAGTGGCAACTGTGACAATCCGGATTTTTTTTTTCTTCTTCTCACCGTTTCTCAGCCAACAAATGGAGAAC	TTCTTCTCACCGTTTCTCAGC	chr9: 3184818 3184798	21	vvi_miC220-5p	TGAGAAACTGGGGGGAAAATG	chr9: 3184911 3184891	21							VITIS-MIR18				grape-m9269	miRC116
vvi_miC220-3p	GTCCTCTGTTTGCTTGCTGAGAAACTGGGGGGAAAATGAAAGAAAACTATAAATCTTTTCAACATGTTCGAGTTGGAGTGGCAACTGTGACAATCCGGATTTTTTTTTTCTTCTTCTCACCGTTTCTCAGCCAACAAATGGAGAAC	TTCTTCTCACCGTTTCTCAGC	chr9: 3184818 3184798	21	vvi_miC220_V1-5p	TTGCTGAGAAACTGGGGGGAA	chr9: 3184915 3184895	21	Variant of vvi_miC220-5p in the same locus											miRC116
vvi_miC220-3p	GTCCTCTGTTTGCTTGCTGAGAAACTGGGGGGAAAATGAAAGAAAACTATAAATCTTTTCAACATGTTCGAGTTGGAGTGGCAACTGTGACAATCCGGATTTTTTTTTTCTTCTTCTCACCGTTTCTCAGCCAACAAATGGAGAAC	TTCTTCTCACCGTTTCTCAGC	chr9: 3184818 3184798	21	vvi_miC220_V2-5p	TGAGAAACTGGGGGGAAAATGA	chr9: 3184911 3184890	22	Variant of vvi_miC220-5p in the same locus											miRC116							vvi-miRn111
vvi_miC221-3p	CCGGGTATGACCGCGGAGTATATTTGGCTCTATGCCAATCAAGGGCATCACAGAGCCAAATATACTCCGCAGCCGATGACCGTG	AGAGCCAAATATACTCCGCGG	chr9: 406324 406304	21									va-miR086
vvi_miC222	The authors do not report the precursor	TCTGAGAACAGCTGGGATTCA	chr9: 4555127 4555147	21												miR073
vvi_miC223-5p	CGAGGCTTGCAAAGATTGTTGCTGAAGAGTGCAAAGGTTTACCTCTGGCTTTGATTACTCTTGGGCGAGCTTTGGCAGGTGAGAAAGATCCCTCA	AAAGATTGTTGCTGAAGAGTG	chr9: 4633125 4633145	21															grape-m1351
vvi_miC224a-5p	TTTTTCTTAGAACCAAGGGCACCCTTAATCCTTCCCCGACTTCGATTCCGATATAAGGTATCAATGGGACCCATTGGTTCAAGAAAGA	TCTTAGAACCAAGGGCACCCT	chr9: 5984686 5984706	21																miRC117a
vvi_miC224b-5p	TTTTTTCTTAGAACCAAGGGCACCCTTAATATGTCCCTGACTTCAATTCCTAGGTGAGGTATCAATGGGACCCATTGGTTTGAGAATGAAG	TCTTAGAACCAAGGGCACCCT	chr14: 19624264 19624284	21																miRC117b
vvi_miC225-5p	AAGTGTTGAGAGATTGGGGCATGTGGGCGATCCTGTTAACTTCTCAATTCGATTGCCCATCAGTGAAATCCTTTCTGTGGACGTCC	AGATTGGGGCATGTGGGCGAT	chr9: 6168416 6168396	21														novel_mir_46
vvi_miC226-5p	TCCGAATCTCCTTGGCTGTTGGAGAGGGTACCAAGGGATACTGTGGCCACCCAGTCTGCCGACAAGTATGCCGACCAAATCAGGATTCTGATCCAAGGTCTAAATGTGTACTTTCGTCGGTTGCTAAAGATGATGAGGAC	CTTGGCTGTTGGAGAGGGTAC	chr9: 917515 917535	21														novel_mir_35
vvi_miC227-5p	The authors do not report the precursor	ATGGATCTTCTAAGACTGTGGAGG	chr9: 9843490 9843513	24	vvi_miC227-3p	TATACCCTCCTGCCTTAGGGACCA	chr9: 9843623 9843646	24							VITIS-MIR44
vvi_miC228-3p	CCTTTTCGTCGTCGTCCATTTGACAAAGTCAGGCGCTTGGGTCAAACCGACACTTGTTTGTACCAAAAACTTGCCCTTCATCTCCCCAATTTTACTGGTTATCCACAAGGCCATATCACGTACAACATCATGAAATTTTACAAATCTAGTACCTGAAGATTCCTCAAGTAGACATGCATGAACGAGAGTA	TTCCTCAAGTAGACATGCATG	chr9_random: 179318 179338	21														novel_mir_37
vvi_miC229	The authors do not report the precursor	TCAGCGGCTGAGATAAGCAAA	chr10:	21												miR033
vvi_miC230-5p	GTGGGATATGGTTACAGAGTCCGATCGGTCAGCTTTGATCCATCCGGCAACTCGTTGACTGCCCATC	GTTACAGAGTCCGATCGGTC	chr10: 11642403 11642384	21															grape-m0256
vvi_miC231-5p	AGAAGTGGAGATTTGGGAAGGTACATAGAATGTAAGGATTCCTCGCATTCTTCGTAACTTCCTAGTCTTTTATTTTATT	AGAAGTGGAGATTTGGGAAGGTAC	chr10: 15276362 15276385	24	vvi_miC231-3p	AACTTCCTAGTCTTTTATTTTATT	chr10: 15276417 15276440	24														vvi-New20
vvi_miC232-5p	TATCTATGCTTGTGGATGAGAAGAGATGCGACAAAGGATTAAAGAACATGTCTTTCACCATCTCCTTAAAATCTGTCTCCAATCAGCGGCTGAGACAGAGCAAATCCAATTTTCTTCCGTTGTAGAATTTGGAGATGTAGATTTTTTATTAAATTCTTCGCCGCAGCTCTTCTCATCCACAAGCAGACCTG	TGTGGATGAGAAGAGATGCGA	chr10: 16107052 16107072	21														novel_mir_47
vvi_miC233-3p	TACTCTCGCACGCTTATCAGGAGGCACCTCTTGACGAGTCGTGATTCAATGCATGATGTCGTGTCATAGTGAACTTGATGGCGTGTGAGTGGTGTT	TGATGGCGTGTGAGTGGTGTT	chr10: 18093497 18093477	21	vvi_miC233-5p	TACTCTCGCACGCTTATCAGG	chr10: 18093572 18093552	21														vvi-New76
vvi_miC234-5p	The authors do not report the precursor	AAGACACGATTGTCAAGGATTTAA	chr10: 1923593 1923616	24	vvi_miC234-3p	AAATCAAAGGCCATCATGTCTTTT	chr10: 1923820 1923843	24	vvi_miC234-5p separated by a gap of 3 nucleotides from vvi_miC235-5p						VITIS-MIR33
vvi_miC235-5p	The authors do not report the precursor	AAAGATATGACTCTAGGTAAAATT	chr10: 1923619 1923642	24	vvi_miC235-3p	ACTTTATCTAGTGTCATTTCTTCC	chr10: 1923793 1923816	24							VITIS-MIR1
vvi_miC235-5p	ATTTAATGAAAGATATGACTCTAGGTAAAATTGGTGTTGGGAAAAATTCATGTAGCCAAACCCAAGTAGTTGGGATTAAGGTTTTGTTGAGTTGGTAAAACAACAACAACAACAACAAAGCCTTATGTTTCAACTATTTGGGTAATTTGGGTGAACTTACGTGAATCATTGTTGTTCTTTCAACTTTATCTAGTGTCATTTCTTCCATTAAAT	AAAGATATGACTCTAGGTAAAATT	chr10: 1923619 1923642	24	vvi_miC235_V1-3p	CTTTATCTAGTGTCATTTCTTCCA	chr10: 1923794 1923817	24	Variant of vvi_miC235-3p in the same locus																		vvi-miRn028
vvi_miC236-5p	AAGTAGTTGGGATTAAGGTTTTGTTGAGTTGGTAAAACAACAACAACAACAACAAAGCCTTATGTTTCAACTATTTGG	AAGTAGTTGGGATTAAGGTTTTGT	chr10: 1923674 1923697	24	vvi_miC236-3p	AAAGCCTTATGTTTCAACTATTTGG	chr10: 1923727 1923751	25														vvi-New9
vvi_miC237-5p	ATTTTCTCATATGGTAGTGATTTTAGGAAGTGTATATAATCTTTTTAATACTTAAAAAATAAAAATTTTCAAGTATTAGAAATGATAAAAGTACTTCCTAAAATCACTGTCAAACACACTCTT	ATGGTAGTGATTTTAGGAAGTGT	chr10: 2014146 2014124	23														novel_mir_52
vvi_miC238-5p	CTATGTTATAGGATCTTGGATATGTAGACTATATAGTGGATGCTCTACGGTTTACATGTCCAAGATACTATAACATGGTC / TGGTTGATGACTATGTTATAGGATCTTGGATATGTAGACTATATAGTGGATGCTCTACGGTTTACATGTCCAAGATACTATAACATGGTCATAAATTAT	CTATGTTATAGGATCTTGGAT	chr10: 2595445 2595425	21	vvi_miC238-3p	CCAAGATACTATAACATGGTC	chr10: 2595386 2595366	21					va-miR062			miR045 / miR076	Vvi-miRC01	novel_mir_56				vvi-New55				Vvi-miRC01	vvi-miRn141
vvi_miC239-3p	The authors do not report the precursor	AAGTGATGAAAATGGTGATAGAAA	chr10: 3022236 3022213	24	vvi_miC239-5p	TTTATCATCATTTTTATCACTTGC	chr10: 3022361 3022338	24							VITIS-MIR48
vvi_miC240-3p	TTTTGAGAATATGTGAGGGAAAATATGAGAAAAATAATAAATTATTATTATATATTACTTTAAATTTATTTAATCTTTTTTAAAATTTTTAAATAAAAGTTAAATAATTTATAAATTTATAAATTTTTTATTAATTTTAATAATATTTAATTTTTTTATATTTTTCATCGTACAATCAAAT	TTTTTTTATATTTTTCATCGT	chr10: 3517185 3517205	21								VV-MIR078
vvi_miC241-5p	AATATGCGCTTGGATACACTTTTTATTTTTTTTGTATTTAAAATAATTTATATATATATATATAAATAGAACATCTCCTACAAAAAATATAAATTTATTTTATGTTTTGAATTTTTTTCAATGATTATTTTTTCAATATAATTTTTTGTTATTATTTATTTATTTTATTTTATTATAAATAGAAAGTATATTCAATCAAACACCT	TGGATACACTTTTTATTTTTT	chr10: 3555749 3555769	21									va-miR028
vvi_miC242a-5p	ACCTTGTAGATGTGTTTTAAAGTCGTGAGGGGCCCTTTGGGTCCAAAGCAGACAATATCTACACGATTGGGAACGAGTCATTACAAATGGT	ATGTGTTTTAAAGTCGTGAGGG	chr10: 4096605 4096626	22																s409712_2
vvi_miC242b_V1-3p	ACTCAATGGACCCTCATGACTTTAAAATGCATCTACATAACTAAGAAAAGTTCATTGCATATACAGTGTTAGGAACTTTTCCCCTTTACCCTAATTATGTAGATGTGTTTTAAAGTCGTGAGGGTCCATTGAACCCAAAGTTGATAATATCTACACGGATGGGAGCAAGTCATTGCAAATGATATCAGGGTAGATTCTTGACTCTTGTGTAAGGCTCTATTTAGCCTCATAAGGGGTATTTGTTTGTTTGACCCTATAATT	AAAGTCGTGAGGGTCCATTGAACC	chr14: 24304152 24304129	24	vvi_miC242b-5p	CTCAATGGACCCTCATGACTTTAA	chr14: 24304262 24304239	24	Variant of vvi_miC242b-3p in the same locus																c49116
vvi_miC242b-3p	TCAATGGACCCTCATGACTTTAAAATGCATCTACATAACTAAGAAAAGTTCATTGCATATACAGTGTTAGGAACTTTTCCCCTTTACCCTAATTATGTAGATGTGTTTTAAAGTCGTGAGGGTCCATTGA	ATGTGTTTTAAAGTCGTGAGGG	chr14: 24304140 24304161	22																s409712_2
vvi_miC242c-5p	CTCTTAATCTTGTAGATGTGTTTTAAAGTCGTGAGGGTTAAGTCATTACAGATGGTATTAAAGTCGATCCTCGACCCCAATGTGGAGGTTTATTTGGTCCTATGAGGGGTGTTTGTAATATCCCACATTGGATGAGAGAGAAAATTACTTAGACTATATATGTATGAACTCCTCTTAACT	ATGTGTTTTAAAGTCGTGAGGG	chr19: 20397809 20397830	22																s409712_2
vvi_miC243_V1-3p	TGAAATCAAGTTGGCCTACCAATCTAGTTTTTAGGGTTTGTGAGGTTTCAACAATGTTACATGGAGTAGCTCAAAATCCCACAAACCCTAAGGACTAAATTGGTAGACCAAATTAATTTCA	TAAGGACTAAATTGGTAGACC	chr10: 4661016 4661036	21	vvi_miC243_V1-5p	CCTACCAATCTAGTTTTTAGG	chr10: 4660942 4660962	21	Variants of vvi_miC243 in the same locus										grape-m0033								vvi-miRn070
vvi_miC243-3p	ACCAATCTAGTTTTTAGGGTTTGTGAGGTTTCAACAATGTTACATGGAGTAGCTCAAAATCCCACAAACCCTAAGGACTAAATTGGTAG	CCCTAAGGACTAAATTGGTAG	chr10: 4661013 4661033	21	vvi_miC243-5p	ACCAATCTAGTTTTTAGGGTT	chr10: 4660945 4660965	21								miR075						vvi-New51
vvi_miC244-5p	AACTTAACCACAATTAAGTTCACAGTTAGAATTTTTACCTGAAAATAACAGTAGTTAAGTTGCATTAACAAAGAACTTAATTATAGTTAAGTTCACAGTAAGATATTTCACCTGAACTTAACAGTAGTTGAGTTTCATTAACAAAAAACTTAACCACGGTTAGGTTCACAATTCGAATTT TCACTTGAACTTAATAGTAGTTAAGTT	TATTAAGTTCAAGTGAAAATT	chr10: 475387 475407	21									va-miR052
vvi_miC245-3p	TTCTTATTTATTTATTTATTTATTTTTATTTTATATTTCAGTTAAAAAAACATTGAACACGGAATGAAGGGGAAGGATAGGGGAATGGAAAAGAAAG	AGGATAGGGGAATGGAAAAGAAAG	chr10: 5353581 5353558	24	vvi_miC245-5p	TTCTTATTTATTTATTTATTTATT	chr10: 5353654 5353631	24														vvi-New26
vvi_miC246-5p	ATTTGGTTGGTGATGAGATAGGATAGGTTATCTCATCACTTATTTTATCTTATATTCAATCAAATAC	ATTTGGTTGGTGATGAGATAGGAT	chr10: 6752078 6752055	24	vvi_miC246-3p	TTTATCTTATATTCAATCAAATAC	chr10: 6752035 6752012	24														vvi-New43
vvi_miC247a-5p	TGTTGATATTAACTAACATAACTAAAGTGAACTTGTTATTAATAAGTTTAGTTTAATTATGTTGGTTGATGTTAATG	AACTAACATAACTAAAGTGAA	chr10: 6852864 6852884	21	vvi_miC247a-3p	TAGTTTAATTATGTTGGTTGA	chr10: 6852902 6852922	21				VV-MIR004
vvi_miC247b-5p	TATTGATATCAACTAACATAACTAAAGTGAACTCGTTATCAATAGATTCAATTTAGTTATATTGATTGATATCAATGGG	AACTAACATAACTAAAGTGAA	chr18: 7928668 7928688	21									va-miR094
vvi_miC248-3p	TTGGTTGGTAAGAAAATGCAGGAAAAGAAAATAATTGAGAGTTTGAGTTTTAGGTTTATGTTATTTGGCACCAGAAAGAATGAAAAACTTAAAATTGTACTATTATTTGGATTTTATTGTGTTGGAGTTTCATTTTTCATGAGAATCAAGATTCGTTTCTTTTATTTTCTTTCTTCAAA TTTCTGAGCAACCAAAC	TTTTCTTTTCCTGCATTTTCT	chr10: 811548 811568	21									va-miR003			miR005
vvi_miC249-3p	ATTTACGTTGATGCATGGTTGATGATCTTCTAGTGATCCTTTGACTTAGTTATCAATTTTTAAGATATTTAGACTCATCAATCAACTCATTATCTTAAATATCACTAAGTTGAATTTCATTGGCCGAAATTGAAAATTTTCGAAAGTTTGTAGATTCCAATTTAGAGTGTTGTCAACATCAAAGTAGGTTAGCAAGGCCTTAGGCATCTTAGTTCTCATTTTTATAAAATTTCCAAAGTTTTATATTCATTTTATTTTATTTTAATGAGGGGATGACCCAAAGTTTAAGGAGACATCATATTATGAATTCTGCTCTAGT	GGAGACATCATATTATGAATT	chr10: 8235982 8236002	21								VV-MIR042
vvi_miC250-5p	CAGAACATTAATGCCTCAAATTTTATGAAAAATTACAGGGCATGCCATTGTGTTTACCGGAGAATTGAATTTTCTTATTGTAATAAGAAATATGACAATTTTCACAAACACAGTGGTATGGTTTGTAGTTTTTTGTAAAATTGGGTACATGTGATG	AAAAATTACAGGGCATGCCATTGT	chr10: 8335507 8335530	24	vvi_miC250-3p	AGTGGTATGGTTTGTAGTTTTTTG	chr10: 8335591 8335614	24																c17424			vvi-miRn026
vvi_miC251-3p	AACGAAGTTTTCATTCTTTCACAGATTAACCATAGGCACATAGTGAAACTGTTAGGTTGCTGTTTGGAGAGTGAAGTTCCTT	TTAGGTTGCTGTTTGGAGAGT	chr10: 9062890 9062910	21															grape-m0073
vvi_miC252a-5p	GCTCCTGATGTTAGTTTGAACTAGGAGATGACATAGAAGATGGTTATTGGATACTGGAGATTCTCGGTATACTTTCTCGTTACCTACCCTATGACAAACCTATAGAAGTAGTAA	TTAGTTTGAACTAGGAGATGACA	chr10: 9409185 9409207	23									va-miR022-1
vvi_miC252b-5p	ACTCTTCAAGTTAGTTTGAACTAGGAGATGACATATTAGATCACTATTGGATGTTAGAGATTCTTTGCACAGCTTGATTCCTAGGTATCATGATTATCTCTTCTATTATACCTAACCTATGAAAAATCTACACTAATAAGGTTTGAAAATTTGAAACCTAAGCCTAAACCTAAAATTAATTTCAATTTAATTATCTAATGGAAATTAAGTATAAGGATTAATGTTAACTTATGGTTTGGATGCAACTTTGAACTAT	TTAGTTTGAACTAGGAGATGACA	chr10: 9507493 9507515	23									va-miR022-2
vvi_miC253-5p	AATGATTGTGGGAAGTGTTTTTAGTCTTTCTAACTCTTGAAAATATTCATTTTTCAAGTATTAGAAATACTAGAAACACTTCTCAAAATTACTGT	AATGATTGTGGGAAGTGTTTTTAG	chr10: 9749137 9749160	24	vvi_miC253-3p	AGAAACACTTCTCAAAATTACTGT	chr10: 9749208 9749231	24														vvi-New12
vvi_miC254-5p	CACTTGTGTGAGCTGCTGAGATTGGAAGGTTTGCTTGAGCATTCTTTGGATTTCGTGTGATTGCTCAGCAGGGA	AGCTGCTGAGATTGGAAGGTT	chr11: 9977646 9977626	21															grape-m0593
vvi_miC255-5p	ACAGCAATTCCAGCTCCAATAGCGTATATTTAAGTCGTTGCAGTTAAAAAGCTTGTAATTGGACCTTGGGATGGGTCGACCGGTCCGCCTCGCTATGTGCACCTGTCGCCTCATCCCTTCTACTGGCGATGTGCTCCTAGCCTTAATTGGATGGGTTGTGCCTTTGGTGCTGTT	CAGCTCCAATAGCGTATATT	chr11: 10360053 10360072	20															grape-m0423
vvi_miC256-3p	ATTCTTCATACCCTTACTAATTTTTTAATATTTTTGGATTTTGATTTTTTTGGGTATCATTTGAACAACTCTTAAGTGTAATAAATCTATTTAAACAATATTCAAGTCATATGAAGTGCAAAATGGGGAGGGTACGAAGAATGT	AAATGGGGAGGGTACGAAGAATGT	chr11: 13586460 13586437	24	vvi_miC256-5p	ATTCTTCATACCCTTACTAATTTT	chr11: 13586580 13586557	24														vvi-New4
vvi_miC257a-3p	AAGCTGTGAGAAGTTGTCTTTACCAATTAATGTTGGCTCTAGCTCATGGTCTTTACTTGATTTCATTGATTGGTTGGGATAGGTTTTTTTAAAAG	ATTGATTGGTTGGGATAGGTT	chr11: 14373412 14373432	21															grape-m0447
vvi_miC257b-5p	ACTTGATTTCATTGATTGGTTGGGATAGGTTTTTTTAAAATTATACATCGTGTATACTTTTAGGTGTATTTTTTTGGCCTTCTTAACACAATTACATTTACTTATAAAAAAAAAAAAACTTCATGGAGTTCATA	ATTGATTGGTTGGGATAGGTT	chrUn: 21377759 21377739	21															grape-m5638
vvi_miC257c-3p	AAGCTGTGAGAAGTTGTCTTTACCAATTAATGTTGGCTCTAACTCATGGTCTTTACTTGATTTCATTGATTGGTTGGGATAGGTTTTTTTAAAAG	ATTGATTGGTTGGGATAGGTT	chrUn: 23153428 23153448	21															grape-m5236
vvi_miC257d-3p	CTTTTAAAAAAACCTATCCCAACCAATCAATGAAATCAAGTAAAGACCATGAGTTAGAGCCAACATTAATTGGTAAAGACAACTTCTCACAGCTT	ATTGATTGGTTGGGATAGGTT	chrUn: 40387825 40387805	21															grape-m5836
vvi_miC257e-3p	AAGCTGTGAGAAGTTGTCTTTACCAATTAATGTTGGCTCTAACTCATGGTCTTTACTTGATTTCATTGATTGGTTGGGATAGGTTTTTTTAAAAG	ATTGATTGGTTGGGATAGGTT	chrUn: 40495194 40495214	21															grape-m5408
vvi_miC258-3p	CACGCGTAGTGGCATGCGTCTTTGCACTCGCAGTGGCATGCGTCCTTGTGCCTTGCATTTGCGGTGCACGGACGGTGGCACGCGCGGTGCA	ACGGACGGTGGCACGCGCGGTGCA	chr11: 14488994 14488971	24	vvi_miC258-5p	CACGCGTAGTGGCATGCGTCTTTGC	chr11: 14489061 14489037	25														vvi-New18
vvi_miC259-3p	GTTTGTATGGTAGGTGACAGAGGAGAGTGAGCACTCATGGTTCTTTTCTTGCATGAAGTTTCTATGCTTGAAGCTCTGTGTGCTTACTCCCTATCTGTCACCCCTCAAGC	GCTTACTCCCTATCTGTCACC	chr11: 1504204 1504224	21																			n_315
vvi_miC260-3p	TTTGTTTTTATAGTATTTTATTTCTATTAAACATTAAAAAGTAAAAAAAATCAATATGTTATTTTTTCTATTTAGAAAAAGCTACATATTTTGACTTTTTCTATTTAGTAAAAAGTTTATAATAAGTAATGAAAAAGTAGAAAAACAAACA	AATGAAAAAGTAGAAAAACAAACA	chr11: 1582491 1582468	24	vvi_miC260-5p	TTTGTTTTTATAGTATTTTATTTC	chr11: 1582618 1582595	24														vvi-New11
vvi_miC261-5p	GAGTCTTGCATGAAGAGGTGGAGAGTGGAGTGCAGCCAAGGATGACTTGCCGGAATTCACATATAGAGTGGAATGAGGCAATAGACCGGCCTCTTCTCATGGTGTCCCTGGCAGGTTGTCCTTGGCTACCTTTCGCTCTCTTCTTCTTATGTGAGGCTG	TGAAGAGGTGGAGAGTGGAGTG	chr11: 16101907 16101928	22					vvi_miC261-5p in tandem with the known vvi-miR169j									novel_mir_1
vvi_miC262-5p	GGGCTTTGCTTGAATAGGAAGAGGGAGGAACAAAGCCAAGGATGAATTGCCGGCGATGAAAGTAGGCAGCTTTGTCCATGGATCGGCAATTTATTTCTTGGCTATGTTGGGCTCTCTTCTTTTCACGTACTGCCA	TGAATAGGAAGAGGGAGGAACA	chr11: 16468014 16468035	22					vvi_miC262-5p in tandem with the known vvi-miR169v									novel_mir_16
vvi_miC263_V1-5p	GCACCAGTGACAACGACCTAAAAATCAACCTAACTGATCAAAACCCCACTAAGACCCAAATCATCATCATCATCATTGTAATGATTTGGGTCTTAGTTGGGTTTTGATCAGTTAGGGTGATTTTTAGGTCGTTGTAGTCACTGTTGT	GGTTTTGATCAGTTAGGGTGA	chr11: 1648918 1648938	21	vvi_miC263_V1-3p	AACCTAACTGATCAAAACCCC	chr11: 1648845 1648865	21	Variant of vvi_miC263-5p in the same locus																		vvi-miRn034
vvi_miC263-5p	GTCTTAGTTGGGTTTTGATCAGTTAGGGTGATTTTTAGGTCGTTGTAGTCACTGTTGTGACTGATTTCCATTTGTTTAGTCTTTGTGCTTACCATTTATTCATGCTCTGTCTTGTTGGAATTTGGTGGTGTTATTCTGGCCATCAAAGTCCAAATTGAAGTAGGCT	GGTTTTGATCAGTTAGGGTG	chr11: 1648918 1648937	20								VV-MIR043
vvi_miC264-3p	TTTTTCTATTTAGTTAAAAGTAACTCATTGACATCAATCAACATCATTAAATTAAACTTATTGATAATAAGTTCACTTTAATTATATTGGTTAGTATCAATAAGGTACTTTTAGCTGAATAAAAAA	TCAATAAGGTACTTTTAGCT	chr11: 18776074 18776094	20	vvi_miC264-5p	TTAAAAGTAACTCATTGACA	chr11: 18775991 18776010	20				VV-MIR053	va-miR049
vvi_miC265-5p	CCAAAGTACATATCATGCTCTTTAGGACTCCAAAATGCATTGTGTTTTGCAATTTGGAGTCTTAAAGAGCATGATATGTACTTTGGT	TATCATGCTCTTTAGGACTCC	chr11: 19800809 19800829	21					vvi_miC265-5p in the same locus and complementary to vvi_miC266-5p							miR001		novel_mir_22
vvi_miC266-5p	Predicted secondary structure available at doi: 10.1111/j.1365-313X.2010.04208.x	CCTAAAGAGCATGATATGTAC	chr11: 19800824 19800804	21							miRC31
vvi_miC267-3p	CCATGATTGGCGTTTAGCACTTTTAAAGAGAAAGCCAGAGGTCCAAAACTATGGCCCCTCAATCACACCAATTGTTTATTGGTATGATTGAGAATAATTGATGTGATTGAAAGATCACGGTTCTGGGCCTTTGGCCTTCCCTTTGGAAGTGCTAAGCGCCCATCATGA	TCCCTTTGGAAGTGCTAAGCG	chr11: 2925907 2925877	21													Vvi-miRC02									Vvi-miRC02
vvi_miC268-3p	The authors do not report the precursor	TAGAGGCTGATTGTAGTTGTTTGC	chr11: 4175780 4175803	24	vvi_miC268-5p	TGCAAACAACCACTATCAGCCTCT	chr11: 4176001 4176024	24							VITIS-MIR34
vvi_miC269-5p	CGGGTATGAGACTGCACTTGAGGGAGGTTCTCCACATGCGGGTATGGAACATCCTCCTTCAAGTGTAGCCCCATGCCCTCT	CGGGTATGAGACTGCACTTGAGGG	chr11: 4175831 4175854	24	vvi_miC269-3p	TTCAAGTGTAGCCCCATGCCCTCT	chr11: 4175888 4175911	24														vvi-New53
vvi_miC270-3p	GGCTCTAATACCATGTTAAGCTACTAATTGACCTAAAAGCATATGGTATCAGAGTCTAAATTGTGTCGGTACTAATTGACCTAAAAGCTTAAGTCTTTAGGTCAATGAGTAGCTTAACATGGTATCAAAGCAT	TCAATTAGTAGCTTAACATGG	chr11: 5156425 5156405	21									va-miR048
vvi_miC271-5p	ATTAATGCTTTGATACCATGTTAAGCTACTCATTGACCTAAAGACTTAAGCTTTTAGGTCAATTAGTACCGACACAATTTAGACTCTGATACCATATGCTTTTAGGTCAATTAGTAGCTTAACATGGTATTAGAGCCTTGAT	TACCATGTTAAGCTACTCATTGAC	chr11: 5156518 5156495	24	vvi_miC271-3p	CAATTAGTAGCTTAACATGGTATT	chr11: 5156424 5156401	24																	c16906		vvi-miRn090
vvi_miC272-3p	CCAAAATATTTGGCTTTTTCTATTAAGCTAAAAGTACCTTGTTGATATTAACCAACATAAATAAAGTGAACTTGTTATCAATAAGTTTAGTTTAGTTATGTTGGTTGATGTCAATGAGTTACTTTCAACTGAATGGAAAAAGTAAGATATTTTGGCT	TGGAAAAAGTAAGATATTTTGGCT	chr11: 5762033 5762010	24	vvi_miC272-5p	CCAAAATATTTGGCTTTTTCTATT	chr11: 5762166 5762143	24														vvi-New77
vvi_miC273-5p	AGGCTGTGATGACGTTTTCAGAGTAAGTCAGGAACTGGGAATGTCCGTTTCTTGGCGGGGCAACCCGGATGGTTTGTGCGATGGGACCTTTTGTGCCTTGTTTCACAAGCAACTGTGGTTGCAGCCATGACGGTCATCTTTTTCTTGTCTGATAAAAGGCGAATCTGAGCCTTC	AGGCTGTGATGACGTTTTCA	chr11: 7520116 7520097	20	vvi_miC273-3p	AAGGCGAATCTGAGCCTTC	chr11: 7519961 7519943	19														vvi-New27
vvi_miC274-3p	GACTGACAGAAGAGAGTGAGCACATGCAGGCAATTTGTATAAGGGTATACCTATGCCGGTGCGTGCTCACCTCTCTTTCTGTCAGCTTC	GCTCACCTCTCTTTCTGTCAGC	chr11: 7623248 7623227	22																					c17280 / c17968 / c17475
vvi_miC275-5p	GATTCAAAGAAATTTCGCAAGGTGCCTAAATCCTCCTTGCAAAATTTTCGCCAGGTATTTCTTCATGGTGCGAAATGGCCAAATTTCGCACCATGAGGAAAATCTCCTTGCAAAATTTTCGCAAGGTAAAATTCACCTTGCGAAATTGGTC	CCTTGCAAAATTTTCGCCA	chr12: 10940324 10940342	19																			n_416
vvi_miC276-3p	ACAGCTCCTCAGGAAGATAGATGCAAGCCAAAGGAGGGATGTTGATTCATGCATCTCAGTAGAGAGCTTAACTATAGAGTAAGACACAACTTTGAATTCATTTTTTGGTTATGGTTGGCTGCTTGGGGTTG	TTTTTTGGTTATGGTTGGCTG	chr12: 1137562 1137542	21												miR100 / miR110	Vvi-miRC06									Vvi-miRC06
vvi_miC277-3p	TCTCTAAAAAGTTAGCAGAGTCTCTTGAGAAGAAGGGGACATCTCACCTTAAATCAATATTCTTACCGTCTTCCCATTGATCAGGGAAACTGATACCAAATAACCAGATGAGTAATATTGATTCTGGGGTAAGCTTTCAAGTTCCCCCACCGACTTCCAACTTTCCAATCT	CAGCCTGATCTACGACCACCC	chr12: 12665079 12665059	21								VV-MIR031
vvi_miC278-5p	GGGTTAGTGATTGGGATTTTTGAATTGAACAGAAGACTTCCAATCTCTGTCAGTATTGCTGTTTGTTTAATTTAGGGGTTTAGTCAGCTCA	TTGGGATTTTTGAATTGAACA	chr12: 1561908 4841628	21															grape-m0693
vvi_miC279-5p	GTTCCTTAATTGATGGCTAGAAATTGCACTTTTAGATGAAAATTGGACTAGATTTTTAACCTCAATTCTATTTTGGAAAAACAATTCCTCAACAAGAAACCTTAGCTGAAGAAAAAAAAGCTCAATTTACCAACCATTCAACCAAACCCTC	TGAATGGTTGGTAAATTGAG	chr12: 17150973 17150954	20									va-miR038
vvi_miC280-3p	TTCCCTCCAAAAGTTGACCCTTGCTTCCACTCAGATAGGCTCTCAAATATTAAGTGTTTCCAAGGATGTGAAGGACTTAACCGAGGAAGAAGCATTCCCATAAAACTCACTTCCCACCCTCTCTACTCCATCAATCCCTCTGATAAAAAGATGCTTGAGAGAGGGTAACTGCCCAAGTGGTGGCAAGGATGAGCAATGCTTACAAT	AGTGGTGGCAAGGATGAGCAA	chr12: 17637729 17637749	21													Vvi-miRC03									Vvi-miRC03
vvi_miC281-5p	AGTACTAGAGTTTGGAATGATTTGTTGATGAAAGTTCAATATTTACGAGTGTTGTCATTATGTTACTATCAGATAACGGATTTGTCTAATTCAATTAGTAAT	TTTGGAATGATTTGTTGATGA	chr12: 17880958 17880978	21													Vvi-miRC04									Vvi-miRC04
vvi_miC282-3p	TCCCTTTCCATATCACCACCGCTACCACTGCCAACATCCCACTGTTGTTGTTGACTCTCACTGGCTGCTACTGGGGAACATCGGTCGCCATCGATGAGAGGCGACAGCAACCGTAGGTCGCTGGCAGTGGTGGCGATGGTGATGTGGAAAGGGAAG	ATGGTGATGTGGAAAGGGAAG	chr12: 1828126 1828146	21	vvi_miC282-5p	TCCCTTTCCATATCACCACCG	chr12: 1827991 1827011	21														vvi-New37
vvi_miC283a-3p	GACTAATCTGGTTTCGTCTGCTTCTTCTTCTTCTTTAAAAAAAATTCCATGGAAAGAATGAAGAAGAAGAACAAGTAGACTGAGCCTGATCATCC	AGAAGAACAAGTAGACTGAGC	chr12: 19456347 19456327	21							miRC32		va-miR089			miR047	Vvi-miRC08		grape-m1119							Vvi-miRC08
vvi_miC283b-3p	AAACCCTTAAACCCTAAACCCGAAGTCCTAAACCCTAAACCCTAAACCTGGAACCCTAAACCCGAAACCCTAAACCCCAAATCCAAAACCCAAAA	AGAAGAACAAGTAGACTGAGC	chr12: 19459414 19459394	21															grape-m1120
vvi_miC284-3p	TCTGCGACCTCTTCTTATATGCAAAGCGAGAACCTAGATTTGCTTCAGCAAAAACTGAAAGAGAGCCTTGGTGACAAGAAGTTTCTACTTGTTCTGGATGATGTTTGGGAGAAATGTCGTAG	TTCTGGATGATGTTTGGGAGA	chr12: 19856388 19856408	21														novel_mir_41
vvi_miC285-3p	TCTAAAACTGACAGAAGGGAATGGGAACAGATTTTGGAGAGTGAAATATGGGGTTTGCAAGATCATGAAATCCTTCCTTCGTTGCTATTGAGTTATCAAGATCTCCCATTGCATCTGAAACAATGTTT	AAGATCTCCCATTGCATCTGA	chr12: 19856799 19856819	21													Vvi-miRC05									Vvi-miRC05
vvi_miC286-3p	CTTTCTTCTACAGATCTGTTCTCTAGTGTCAATTGTATACTTTGCGTGTATTTTGTTGCACCCTTATATATATATATATATATATATAACAAAGGCGCAACAAAGTACACACAAAGTATACAATTGACACTGAAGAATAGACAAGTAGAAGAAAGAGATAAGGCACA	AGAATAGACAAGTAGAAGAAAGAG	chr12: 20335232 20335255	24	vvi_miC286-5p	CTTTCTTCTACAGATCTGTTCTCT	chr12: 20335099 20335122	24																	c28495
vvi_miC287-5p	TCAAAATATTTGACTTTTTCTATTAAGCTAAAAGTAACTTATTGATATCAACAAATATAACTCTATTGAACTTGTTATCAATAAGTTCAGTTTATTCTGGTTGATATTAACAAGTTACTTTTGGTTGAATAGAAAAAGCCAAAATATTTTA	TGGCTTTTTCTATTCAACCAA	chr12: 20551218 20551198	21								VV-MIR069
vvi_miC288a-5p	TAAAAGCCCATTTGGCAGTGATTCTAGGAAACTCTTCTAACATTTCTAGCACTTGAAAATTTTTATCCTTTCAAGCCTTAGAAAAGGCCGGAAACATTTTCTAGAATCATTGCAAAACAGGCTCTAA / AGCCCATTTGGCAGTGATTCTAGGAAACTCTTCTAACATTTCTAGCACTTGAAAATTTTTATCCTTTCAAGCCTTAGAAAAGGCCGGAAACATTTTCTAGAATCATTGCAAAACAGGCT	TTTGGCAGTGATTCTAGGAAA	chr19: 19300164 19300144	21															grape-m4560	miRC102a
vvi_miC288b-5p	GTTTGGCAGTGATTCTAGGAAACACATCTAACCTTTTTAGCTTTTGAAAATTTTGATCAAAAGAGTTGTTTTGAAGCAATAGAAAGACTAGAAATACTTCCTAAAATCACTATCAAAC	TTTGGCAGTGATTCTAGGAAA	chr12: 22422911 22422891	21																miRC102b
vvi_miC289-3p	CCGACTTAGAGTGCATGAAAAATATATAATTTTTCACATTAAAAGTTAGTTTTCAGATTTCGTGAAGTTGGATTCCAAAAATCATATATTTTCCAAATTGCTCCATCAA	ATTATATATTTTTCATGCAC	chr12: 8786363 8786382	20								VV-MIR027
vvi_miC290-3p	TTATTCCATGGTATTTACATGAGATTCCTCTTTCTTATTCTTAAGCAAGTGCCCGAGAGGACTTAGTGGATCCATGATTTAA	CCCGAGAGGACTTAGTGGATC	chr12_random: 1474833 1474853	21																	grape-m1188
vvi_miC291-3p	TTCTGCTTCAGGTACTCTTTCCAGTTTAAGCAATTCACTTTCCCATTGAGGTATTGTCTTGCTGAACAAGAGAGAACCTAGAACTTTCA	TTGCTGAACAAGAGAGAACCT	chr12_random: 470010 469990	21																	grape-m1191
vvi_miC292	The authors do not report the precursor	AAGAAGTGAAAGAGGCTGTGA	chr13: 11509702 11509682	21												miR103
vvi_miC293a-3p	TGTGGCTAGCATGAGTTTTGAACTAATAAAAACAATTTAGTTCAATGCTCACGCTAGCCATTTC	TTCAATGCTCACGCTAGCCATTTC	chr13: 15109400 15109377	24	vvi_miC293a-5p	TGTGGCTAGCATGAGTTTTGAACT	chr13: 15109440 15109417	24														vvi-New86a
vvi_miC293b-3p	TGTGGCTAGCATGGGTTTTGAACTAATAAAAATAATTTAGTTCAATGCTCACGCTAGCCATTTC	TTCAATGCTCACGCTAGCCATTTC	chr13: 15109601 15109578	24	vvi_miC293b-5p	TGTGGCTAGCATGGGTTTTGAACT	chr13: 15109641 15109618	24														vvi-New87b
vvi_miC294-5p	TTTCTCATAGAAATACTGATTATTCGGTTCAGGGTTATTTTCAACACCCTTTTTGGCCTTAGTTTAAACTACTGGATGGCCATCTCTTCAAGGTTTCTTCTTGGAAGTATGAGTACTTTACTTGGACCAATAATGGTATTGTTTTATTGCTTATGACTTT	AAATACTGATTATTCGGTTCAG	chr13: 15466861 15466840	22															grape-m1556
vvi_miC295-5p	TCAATTCTGAACGGTCAATGATTTAGCAAGAAATGAAAAATCTTTTGAGTAGTTTGTTGCTAAATCTTTGATTCGATCAGAGTTTA	ACGGTCAATGATTTAGCAAGA	chr13: 16723547 16723527	21															grape-m1565
vvi_miC296a-5p	Predicted secondary structure available at doi: 10.1111/j.1365-313X.2010.04208.x	AACTGTGGCTTTGACGGTGTA	chr13: 17180872 17180852	21							miRC25_1
vvi_miC296b-5p	Predicted secondary structure available at doi: 10.1111/j.1365-313X.2010.04208.x	AACTGTGGCTTTGACGGTGTA	chr13: 17793872 17793852	21							miRC25_2
vvi_miC297_V1-5p	ACCCCAATGACCAAGACATGAAGACCACCACTGGTGGTGGTGGTGGTATTTGAATCATGGTGCATCATCCC	CCAAGACATGAAGACCACCACT	chr13: 17730108 17730087	22					Variant of vvi_miC297-5p in the same locus									novel_mir_51
vvi_miC297-5p	CCCCAATGACCAAGACATGAAGACCACCACTGGTGGTGGTGGTGGTATTTGAATCATGGTGCATCATCC	CAAGACATGAAGACCACCACT	chr13: 17730107 17730087	21								VV-MIR029
vvi_miC298-5p	Predicted secondary structure available at doi: 10.1111/j.1364-3703.2012.00815.x	AACAAGGATCTCTTAAGAAAGGAC	chr13: 18365934 18365911	24										s23442
vvi_miC299	The authors do not report the precursor	GGGTTGAAGGGAAGATAGAGA	chr13: 19651505 19651525	21												miR064
vvi_miC300-5p	AACACTCCATTTTTAAAAAGGTTCGTCATTCATCTTTCAACCGCCAAGAGTATGAGAAGTTTGAAAGATTCAAAACCTTTCATAAGATGAAGTGTTT	TTTTAAAAAGGTTCGTCATTC	chr13: 20001209 20001229	21													Vvi-miRC10									Vvi-miRC10
vvi_miC301a-3p	TCAAGCACGATCCAAGTAGTGATGATGAAGTCTCCGTAATTCCAATTGTCGGTATGGGAGGTATCGGCAAAACTACTCTGGCTCAGCTTGC	GTATCGGCAAAACTACTCTGG	chr13: 20235040 20235060	21															grape-m0193
vvi_miC301b-3p	TCAAGCACGATCCAAGTAGTGATGATGAAGTCTCCGTAATTCCAATTGTCGGTATGGGAGGTATCGGCAAAACTACTCTGGCTCAGCTTGC	GTATCGGCAAAACTACTCTGG	chr13_random: 2504453 2504473	21															grape-m0954
vvi_miC302-5p	CTTTTTACTTTTCCTCTTTATTTTCTTTCCATTACATTTTCCCTCAAACTTTCCAGAAACCAAACACGGCTTTAAAGAAAGCTGTAAAAGAAAAAATAGAGAAGAAAAAAAAATAA	TTCCTCTTTATTTTCTTTCCA	chr13: 20548814 20548834	21															grape-m1354
vvi_miC303-5p	TACTTTTGAATTGATTACAGTGGGATGGGACCTATGAAATTAGAATTCATTTCCGAATCTGTTAGTATATGGAGTGACTATACTGTAGATTTGGAAATGGATCCTAAAATTCCCATGGTTCCCTTTCTGTGTAATCAAACTTAGTCTTCAAAATCT	TTGATTACAGTGGGATGGGACC	chr13: 21038008 21038029	22												miR079			grape-m1364
vvi_miC304-5p	ATAATCTGCACAAGGCTGAATAGAAAACCAGTTACCGCCAACAAAACGTAGTACTGCAAACAATGTGATACTGGATTACTGATTCATTGTTGTAGATATT	CAAGGCTGAATAGAAAACCAGT	chr13: 21698173 21698152	22															grape-m1612
vvi_miC305-3p	AGTGGGTATTTTCTTAATCAATTTAGGGCAATTATAAATTGTAAGCGTACGGAGGCAAGGGAATGAGGAATCTATCGAGGAGGACCGGTCCTCCCAATACTCCCATTCTGACATATTTACAAACTGTAGAGACTCTAGTGATGGGAAAAGCTTAT	TGTAGAGACTCTAGTGATGGG	chr13: 21869462 21869442	21															grape-m0250
vvi_miC306-3p	AGTAAAACCACAGTTACTAACTGTGGTTTTATGGTTGTTTTGATAAAAAAAATATTTTAAAAATAATATTAAAATTATAATACCATTAAAATGAGGACGGATTAAAAATAATTGTAAAACCACAGTTAGTAACTGTGGTTTTAAGGG	AGTTAGTAACTGTGGTTTTAAGGG	chr13: 22247201 22247178	24	vvi_miC306-5p	AGTAAAACCACAGTTACTAACTGT	chr13: 22247324 22247301	24														vvi-New32
vvi_miC307-5p	GTTCCTCTTGTCATCGAGACTTTAGGCGGAATGTTGTACTTCAATACCCAAGAAAGCCATTGGTTGAGCATTAAAAAAAATAAAAATCTTGTACTTCTTGGAGAAAAAAATGATATTTTACCGATATTGAGGTTAAGCTATGACAATCTTCCC	TCATCGAGACTTTAGGCGGAA	chr13: 22627370 22627390	21	vvi_miC307-3p	CCGATATTGAGGTTAAGCTATGACA	chr13: 22627480 22627504	25										novel_mir_49
vvi_miC308a-3p	CTCTTCAAGAGACGAGTTCCCTTTAGGAAATTTTTTTTTTTTAAATATATATATTTTTAAAAAAAAATATTTTTTTTTACATGGGAACTCGTATCTTGAAGAGAC	TGGGAACTCGTATCTTGAAGAGAC	chr13: 23446870 23446893	24	vvi_miC308a-5p	CTCTTCAAGAGACGAGTTCCCTTT	chr13: 23446789 23446812	24														vvi-New80a
vvi_miC308b-5p	TGGGAACTCGTATCTTGAAGAGACGAGTTCCCTTGAGGAATTGTTTTTTTTATTTTTATTTTTTTATTTGGGATTTAAAAAAAAAAATTTTTTTTTTTACATGGAACTCGTCTCTTCAAGAGACGAGTTCCTTAA	TGGGAACTCGTATCTTGAAGAGAC	chr13: 23446870 23446893	24	vvi_miC308b-3p	CTCTTCAAGAGACGAGTTCCTTAA	chr13: 23446981 23447004	24														vvi-New80b
vvi_miC309a-3p	CGGGATTAGTCATGATGCTATACAAGATGATATTCTCAACAGGCTAATACATCATCCAAATTTAAAAAAACTGTCCATTCAACACTATCCTGGTCTAACATTTCCAGATTGGCTTGGAGATGGATCATTTTCAAATCTC	TTGGCTTGGAGATGGATCATT	chr13: 23694687 23694667	21													Vvi-miRC13									Vvi-miRC13
vvi_miC309b-3p	ATGCTATACAAGATGATATTCTCAACAGGCTAACACCTCATCCAAATTTAAAAAAACTGTCCATTCAACACTATCCTGGTCTAACATTTCCAGATTGGCTTGGAGATGGATCATTTTCAAAGCTC	TTGGCTTGGAGATGGATCATT	chr13: 24166919 24166899	21													Vvi-miRC14									Vvi-miRC14
vvi_miC310-3p	AAATGGTGTTCCAAAGTACACAAGAAGTATACAAAGAAAATGCCTAAAGGCGCCACAAAAACAAAGAGGGACCACAAAAGACAACTTCCTTAACCCAAACCCAACCAGTCCACAAAGTCTGGAAAGAGGACTAGGAATTATATACAACTTGCACTACGCCTGAAAATTACAAA	TATACTTCTTGTGTACTTTGG	chr13: 23988795 23988775	21								VV-MIR052
vvi_miC311-5p	CGGCTCCAGTTCGAGAAAGGGCAAGAATGGCGTTATATATCTCACATTCCAAAAATAACGATCGGTCTTGAGCTATTTTAATGGGAGTGGC	TCGAGAAAGGGCAAGAATGGC	chr13: 24202187 24202167	21															grape-m1662
vvi_miC312-3p	CTTTGCTTCATGTTTCGAGATAATTCTAGGGAGATGATCCTTCTACTTTGAGTTCTTATTCGTCTTGAACAGAGCAATGAGCA	TCTTGAACAGAGCAATGAGCA	chr13: 24294782 24294762	21	vvi_miC312-5p	CTTTGCTTCATGTTTCGAGATA	chr13: 24294844 24294823	22														vvi-New73
vvi_miC313a-3p	GCCCTCGTTTGATTTCCGAGAAAATCCATGCAAAACCCCCAACTCGGAAATCAAACGAGGATGG	TCGGAAATCAAACGAGGATGG	chr13: 4158943 4158963	21	vvi_miC313a-5p	GCCCTCGTTTGATTTCCGAGA	chr13: 4158900 4158920	21														vvi-New70a
vvi_miC313b-3p	GTTTTCTGTTTGATTTCCGAGAAAATCCATGCAAAACCCCAAGGAAAACAAAAAAAAATTGCTTTTTTTCCGGCCCCCCATTTCGTTTTCCGGGAAAATTCGCCCTTGTTTGATTTCCGAGAAAATCCATGCAAAACCCCCAACTCGGAAATCAAACGAGGATGG	TCGGAAATCAAACGAGGATGG	chr18: 8282690 8282670	21	vvi_miC313b-5p	GTTTTCTGTTTGATTTCCGAGA	chr18: 8282834 8282813	22														vvi-New70b
vvi_miC314-3p	ATGAGCTGTTCAGTATACATCTGGAAATGGATACTGCCGGCGCGCCAAATACGCCGCCGTCGAAGCTGAAGCTGACGCCAATCGAAGCAACTCCGGAGACTTTCAAGGAATTTGGGCAGGTGATCGGGGTTTCGCCGGACGGTGAGAAGTTCGG	CGGGGTTTCGCCGGACGGTG	chr13: 4835501 4835482	20															grape-m1458
vvi_miC315-5p	GTTGCTTACTCTGAATGGATCAAGGAGTTGTGTACTGAAGGGAAATACAAGGATGCAATGCGCATTTTTGGAGAATCAAAGCAGAAGGGCATTACTGTGGATAAATCCACATATATAAATTTGATGGATGGGCTTATCAAACGAAGAAAAAGCATTCAAAGGAAGCCCGATGATACTGA CTCCTTGGGTTCTCTTCCTGGCAATG	CTGAATGGATCAAGGAGTTGT	chr13: 4841645 4841665	21															grape-m1191
vvi_miC316-5p	TGAGGAAGGGTGTTAGAGTACATGATACATTATGGTCCAAAGTGCATATCATGCACTCTAACACCCTCCCTCACA / ACCTAACGTGAGGAAGGGTGTTAGAGTACATGATACATTATGGTCCAAAGTGCATATCATGCACTCTAACACCCTCCCTCACAGGT	TGAGGAAGGGTGTTAGAGTAC	chr13: 5489821 5489841	21	vvi_miC316-3p	ACTCTAACACCCTCCCTCACA	chr13: 5489875 5489895	21					va-miR035									vvi-New74
vvi_miC317	CGTATAACTCATTTATCCTATTTAATAATTAAGTCATCTTATCTAATAATAAAGTTGAGTTAAGTCTTGTGTAAGTTTATATAATTAATATTTTAACCAAATATATTTATTACTCAATTAATCTATTTATTTAAAAATAAATTTAAAATGAGTTGAGTTAAATAGTTTGAATTTATATTTAGGTTAGTTAGCAGAGTTATTAAATAGGTCAATTTAAGTCAAATTC	AAATTGACCTATTTAATAACT	chr13: 6345665 6345645	21									va-miR098
vvi_miC318_V1-5p	CAGGAAAGTCAGGGAAGTGTACCTGTCACAGAAAGAAAATAAATTTGACAGGTACACTTCCTTAACTTTTCGGTG	CAGGAAAGTCAGGGAAGTGTACCT	chr13: 6511579 6511602	24	vvi_miC318_V1-3p	GTACACTTCCTTAACTTTTCGGTG	chr13: 6511630 6511653	24	Variants of vvi_miC318 in the same locus																		vvi-miRn006.2
vvi_miC318-5p	CAGGAAAGTCAGGGAAGTGTACCTGTCACAGAAAGAAAATAAATTTGACAGGTACACTTCCTTAACTTTTCGGTG / ATAAACACAGGAAAGTCAGGGAAGTGTACCTGTCACAGAAAGAAAATAAATTTGACAGGTACACTTCCTTAACTTTTCGGTGCTTGT	CAGGAAAGTCAGGGAAGTGTA	chr13: 6511579 6511599	21	vvi_miC318-3p	CACTTCCTTAACTTTTCGGTG	chr13: 6511633 6511653	21					va-miR075			miR078			grape-m1203*			vvi-New48			c26718 / c32305 / c33714		vvi-miRn006.1
vvi_miC319-5p	TGTAACTTATAATGCACTCAAATCAGGTACAATGCAAAAGATGCAAATAAGAATACTCATGAAGTGTAATATATAAAATAAGGATAAATAAAAGTGAAATTAAAATATTATTAAATAATG AATTCCAAATTTTATTATATCATGTCATACTTTTAAAGGCTATATCCAAACACTCTAAATCTAATACAGTGAAAAAACATGACAACAAAAATCATAGTAAAGCATAAACATGGAACTTTT AAGTCATACCTATGATCTGGATGTTCTTAAATTGAAT	GAACATCCAGATCATAGGTATGA	chr13: 6688438 6688416	23									va-miR060
vvi_miC320-5p	TCTTTTTTTTTTTTTTTATTGGATCCGTCGGGACTGACGGGGCTCGAACCCGCAGCTTCCATACCCGATTCATAACTAGAAAGTT	TTTTTTTATTGGATCCGTCGGGA	chr13: 8831133 8831155	23									va-miR001
vvi_miC321_V1-3p	TACATTCAATTGATTCTCAAACCTTGAAGTATTTTCTTCTAACATTTTGAGATCATTTTCCTTTCTTTCAGAGGGATATGTTTCTTTTCTCTCACTATCACTATTGAAAATTTTATGATGCCTTACAATGAGAAGTGAGGGCTTTATATAGGCTTTGAGGATGGATCTGAAATCC	TTATATAGGCTTTGAGGATGGA	chr13: 9059941 9059962	22					Variant of vvi_miC321-3p in the same locus								Vvi-miRC09									Vvi-miRC09
vvi_miC321-3p	TACATTCAATTGATTCTCAAACCTTGAAGTATTTTCTTCTAACATTTTGAGATCATTTTCCTTTCTTTCAGAGGGATATGTTTCTTTTCTCTCACTATCACTATTGAAAATTTTATGATGCCTTACAATGAGAAGTGAGGGCTTTATATAGGCTTTGAGGATGGATCTGAAATCC	TATATAGGCTTTGAGGATGGA	chr13: 9059942 9059962	21														novel_mir_48
vvi_miC322a-5p	GACCGTGTCATGGTTATAGAGAAGCTGAGCGAGTGTGGTCTTGCCGCTGCCGCCCATGCCCACTATGGACATCACATCTACGTTGTTGCCTGTTGAATTTTCCTTATCAGAAAGCAACCATTTCACCATCTCCTCCTTAATTTCATTCCTGCCGTACACAGAGGACTCGTCCACCAGAGAAGTGGAT	TGGTTATAGAGAAGCTGAGCG	chr13: 9274818 9274798	21															grape-m0221
vvi_miC322b-5p	CACTCTATCATGGTTATAGAGAAGCTGAGCGAGTGTCGTCTTGCCGCTGCCGCCCATGCCCATTATGGATATCACATCTATGTTGTTGCCTGTTGCATTTTCCTTATCAGAAAGCAACCACTTCACCATCTCCTCTTTAATTTCATTCCTGCCGTACACAAAGGACTCATCCACCAGAGAAGTGGATGGTGATCTTGGTGACAGTTTCTCGCCCTCACCTTCTTTCAGCCCTAGCTCAACTTTTTCTTGTGCAATGTTTTCAAGTAGAGAA	TGGTTATAGAGAAGCTGAGCG	chr18: 5500405 5500425	21															grape-m0555
vvi_miC323-5p	AATTTCAATTTCTGAAGTTTGAAGAGCTGTGAAGCCACAAGTTTCCCTTTTCAAGAGCAATCTACGAACAACAGGAACATTGAGTGT	TCTGAAGTTTGAAGAGCTGTG	chr13: 9287898 9287878	21	vvi_miC323-3p	AGAGCAATCTACGAACAACAGGAA	chr13: 9287855 9287832	24									Vvi-miRC12	novel_mir_50								Vvi-miRC12
vvi_miC324	The authors do not report the precursor	CACAGTTCCTGCAATTCGTCA	chr13_random	21												miR065
vvi_miC325-3p	TTCAAACATACATTTCCGGCAATAGATTGAGCCAAATCATGGATGAGATCATGCATCATGAATCGTGGCATTATGTTACTTGATTGTTGAAAGAACGACCTTGATAACAACTCAGAGAAGTATTTGGAACCTAAGTCCTCCATTCGCTTCTTCCCTTTTGTTTGCTGCAGAAATCCTTCTCCCATCCATAAAAGGATTAATTCATCCTTTTTGAATTCATATCCCTTGGGAAAAATAGCGCAATAAGCAAAGCACTGCTTCAGATGAGATGGCAGGTGATGATAGCTCAATTTGAGAGCTGGAAGAACACCACTTTT	TCAATTTGAGAGCTGGAAGAA	chr13_random: 2451516 2451596	21													Vvi-miRC15									Vvi-miRC15
vvi_miC326-3p	GATGGCAAGGATGAACAAGTTTTACAATCGTGGAGGTGCATGTACACCATATTGGTAAATGAATGTTCGCTTAACCAGT	ATATTGGTAAATGAATGTTCG	chr13_random: 3260523 3260503	21													Vvi-miRC16									Vvi-miRC16
vvi_miC327-3p	AATTCAACTTTGATCGAATCAATGATTTAGCAAAAAAATTTAAAAAAGAAACATTATTTCCATAATTTTTCTTGCTAAATCCTTGACCGTCCAAAGTTTCTC	TTGCTAAATCATTGATTCGATC	chr13_random: 986863 986874	22									va-miR015
vvi_miC328-3p	AATCCAACTTTGATCGAATCAAAGATTTAGCAAAAAAAAAATTAAAGAAGAGAAATTATTTCAACAATTTTCCTTGCTAAATCTTTGACCGTTCAAAGTTTCTC	TTGCTAAATCTTTGATTCGATC	chr13_random: 990058 990079	22									va-miR014
vvi_miC329-3p	AGCCAAATTAGAATCAGAAACAAGCAAGGAAGCTGACAGTGATGATGAAGAAGACAAGCATGTAAGTTTCTCCTTTGATTACTGTTTGATATCCATTATCTATTAAATATCCGTCACCTTATATCAATTTCTTATGTTCATGATTGTAGGATGAGC	AATTTCTTATGTTCATGATTG	chr14: 1037537 1037557	21													Vvi-miRC17									Vvi-miRC17
vvi_miC330-5p	ACCTTCATTGCTAGAGATTGTGGATTAGGCTTTATAACCTTGTCATCCACCGTCTTAAATAAACTCCAAGCTTCCTTCCATTAAATATTCAACCAAATTCTTCCAAATATTCATAAAATCAATACCATTTTTTCAAATCAAGTCTCTTTCATATGTCATCTCAAGTTTTTAAGGTT	CTAGAGATTGTGGATTAGGCT	chr14: 10959021 10959041	21												miR002		novel_mir_55	grape-m0281
vvi_miC331-3p	AGTGGGGATGGGCGGCGTGGGCAAAACCACACTGGTGAAACAAGTAGCTCAACAAACTAAGCAACAGCACTTGTTCACTGCACAACTCTATATAGATGTATCCTGGACTCGAGGCTCTTGTACACTTCAACAAGAAGTAATTTCATATATTCAACAAAATATTGCAGAAAAGTTAGACTGGGAATTTAAGGGGTTGGATGAATCCACAAGAGCAGTTGAACTGAAGCAAAGACTGACG	AAGAGCAGTTGAACTGAAGCA	chr14: 11961987 11962007	21													Vvi-miRC18									Vvi-miRC18
vvi_miC332-3p	GACATGGGCGCACAAGTATGTTTTCCAGTGGAACATTTACCACCAGAAGAAGCTTGGAGTTTATTTAAGCAGACAACAGGTGATTCCGTGGAGGAGAATCTTGAACTGCGACCCATAGC	TGGAGGAGAATCTTGAACTGC	chr14: 12116361 12116381	21															grape-m0283
vvi_miC333-3p	CTTGTTTATTTAGTTTGCTTTAATTGAAAAATAGATTAATGAATCCTATGATTAGTTAGGTTTATTTGAATCCTTGGAGCTTGCTAATGGATTAGGTT	TGGAGCTTGCTAATGGATTAGGTT	chr14: 13304980 13305003	24	vvi_miC333-5p	CTTGTTTATTTAGTTTGCTTTAAT	chr14: 13304906 13304929	24														vvi-New78
vvi_miC334-5p	Predicted secondary structure available at doi: 10.1111/j.1364-3703.2012.00815.x	CGACGAGATAGGTCCACCCTA	chr14: 1352200 1352180	21										s766416
vvi_miC335_V1-3p	TACCAATCAATGGACAATCTCAGTTTGATGAGATCTTAACCATGGTTCCTAAGTCTTCATCAAACTGAGATCGTCCATTGATTGGTACT	CGAGATCGTCCATTGATTGGTACT	chr14: 1404193 1404215	24	vvi_miC335_V1-5p	TACCAATCAATGGACAATCTCAGT	chr14: 1404127 1404150	24	Variants of vvi_miC335-3p and vvi_miC335-5p in the same locus. In bold nucleotide that differ from the annotated sequence of reference genome.																c40152
vvi_miC335_V2-3p	CAATCAAGTACCAATCAATGGACAATCTCAGTTTGATGAGATCTTAACCATGGTTCCTAAGTCTTCATCAAACTGAGATCGTCCATTGATTGGTACT	CGAGATCGTCCATTGATTGGT	chr14: 1404192 1404212	21	vvi_miC335-5p	CAATCAATGGATAATCTCAGT	chr14: 1404130 1404150	21	Variant of vvi_miC335 in the same locus. In bold nucleotide that differ from the reference genome																c33165
vvi_miC335-3p	AAATGAGGTTAATGGTACTAATGGTTCATCAAGTTCACTATTTCAAGTTTTCAAGAAATTAAAACACAATCAAGTACCAATCAATGGACAATCTCAGTTTGATGAGATCTTAACCATGGTTCCTAAGTCTTCATCAAACTGAGATCGTCCATTGATTGGTACTTGATTTTGTCTTAATTTCTTGAAAACCTGAAATAATAAACTGGATGAACCATTAACCTTGTTT / ATCAAGTACCAATCAATGGACAATCTCAGTTTGATGAGATCTTAACCATGGTTCCTAAGTCTTCATCAAACTGAGATCGTCCATTGATTGGTACTTGATTTTGTCTTAATTTCTTGAAAACCTGAAATAATAAACTGGATGAACCATTAACCTTGTTTGTTATCATCAAA…	TGAGATCGTCCATTGATTGGT	chr14: 1404192 1404212	21	vvi_miC335-5p	CAATCAATGGATAATCTCAGT	chr14: 1404130 1404150	21	In bold nucleotide that differ from the reference genome															c63106	c41220		vvi-miRn060
vvi_miC336-5p	CAAACTCTTATACCAAGGTCGAGGATTGACTTCAATACTATTTGTAATGACCCCCTCCTAGCCAATAGGGGAAAAAGTTCTAAAGGCACAAGGGTTAATCATTCTTAGATTTGACAATATCTACATGGTTGAGAATTAGTCGTTACGAATGATATGAGAGTCAAACCTCAACCTTGGTATGAGAGTTTGT / AGGCTAAACAAACTCTTATACCAAGGTCGAGGATTGACTTCAATACTATTTGTAATGACCCCCTCCTAGCCAATAGGGGAAAAAGTTCTAAAGGCACAAGGGTTAATCATTCTTAGATTTGACAATATCTACATGGTTGAGAATTAGTCGTTACGAATGATATGAGAGTCAAACCTCAACCTTGGTATGAGAGTTTGTTTGTCCTT	TACCAAGGTCGAGGATTGACT	chr14: 14721722 14721702	21	vvi_miC336-3p	TCAAACCTCAACCTTGGTATG	chr14: 14721572 14721552	21											grape-m2136	miRC123
vvi_miC337-3p	AGGTGAAGGAGAAACAGTTAGGTTCAGCTCAAAGCTATCTCATTCCTTTGCCTCGGTTGCTCTCATACTACTTGATCCATCGTGGACACCAGTTACCTGAGTCTAATCGTCGTATGGCTTCTCACACT	TGAGTCTAATCGTCGTATGGC	chr14: 17188675 17188655	21															vvi-miRC771
vvi_miC338_V1-5p	GAGCTACTGGAAGTTGTAGGAATGGGCTGATTGGGATAAAAATCTTATGGTGGAAACACTTAAATTTTTTTCCCAATGCCGCCCATTCCAATGATTTTCAGCTGTTCCTCC	AATGGGCTGATTGGGATAAAA	chr14: 19755561 19755541	21	vvi_miC338-3p	TTCCCAATGCCGCCCATTCCAA	chr14: 19755512 19755491	22	Variant of vvi_miC338-5p in the same locus									novel_mir_39
vvi_miC338_V1-5p	The authors do not report the precursor	AATGGGCTGATTGGGATAAAA	chr14: 19755561 19755541	21	vvi_miC338_V2-3p	TTTCCCAATGCCGCCCATTCC	chr14: 19755513 19755493	21	Variants of vvi_miC338-5p and vvi_miC338-3p in the same locus						VITIS-MIR9
vvi_miC338-5p	CGGAGCTACTGGAAGTTGTAGGAATGGGCTGATTGGGATAAAAATCTTATGGTGGAAACACTTAAATTTTTTTCCCAATGCCGCCCATTCCAATGATTTTCAGCTGTTCCTCC / GGAGCTACTGGAAGTTGTAGGAATGGGCTGATTGGGATAAAAATCTTATGGTGGAAACACTTAAATTTTTTTCCCAATGCCGCCCATTCCAATGATTTTCAGCTGTTCC	GGAATGGGCTGATTGGGATA	chr14: 19755563 19755544	20	vvi_miC338-3p	TTCCCAATGCCGCCCATTCCAA	chr14: 19755512 19755491	22								miR006	Vvi-miRC20				vvi-miRC482a					Vvi-miRC20
vvi_miC338-5p	GAGATCGGAGCTACTGGAAGTTGTAGGAATGGGCTGATTGGGATAAAAATCTTATGGTGGAAACACTTAAATTTTTTTCCCAATGCCGCCCATTCCAATGATTTTCAGCTGTTCCTCCCTT / GAAAGAGACTGAGAAGAGGGAAAGAGAGATCGGAGCTACTGGAAGTTGTAGGAATGGGCTGATTGGGATAAAAATCTTATGGTGGAAACACTTAAATTTTTTTCCCAATGCCGCCCATTCCAATGATTTTCAGCTGTTCCTCCCTTTCCCTGCCATCTCAATTCCTCATATTC	GGAATGGGCTGATTGGGATA	chr14: 19755563 19755544	20	vvi_miC338_V1-3p	TTTTCCCAATGCCGCCCATTCC	chr14: 19755514 19755493	22	Variant of vvi_miC338-3p in the same locus										vvi-miRC482a				n_47*
vvi_miC339-3p	AATATGTGATATGACAATCCCCCCTCATGCAAACAACCCCAATGTAAGATTATGTCTGTT TGATCCCATAAGGAGCATCTACCAGTCTAGCCCCACAATTGCGTGGGACACGACAAGGATGTCATGTTTTTATGAGAGGGTGATTGTGATATCCTACAAAG	TTTGCATGAGGGGGGATTGTCAT	chr14: 21013556 21013534	23									va-miR005
vvi_miC340-3p	The authors do not report the precursor	ATATGTAGTGGACTCCTTTTAACC	chr14: 21015082 21015059	24	vvi_miC340-5p	TTGGTTAAAAGGAGCTCACTATAT	chr14: 21015320 21015297	24							VITIS-MIR35
vvi_miC341-5p	GATCAAGTTTGAAGATCCGGAATTCTTAGAGCACAAATTCAAGTCCAATACTTTCAATCCAAGATCAAGAACTAAGCATTTAGTCAATTCTGTCTCTTCAAATTTCCAG	GAAGATCCGGAATTCTTAGAGC	chr14: 21179957 21179936	22															grape-m2196
vvi_miC342a-3p	The authors do not report the precursor	TTTGGTAGTGATTTTAGGAAG	chr14: 22232429 22232449	21										s1554162_1
vvi_miC342b-3p	The authors do not report the precursor	TTTGGTAGTGATTTTAGGAAG		21										s1554162_2
vvi_miC343-5p	GGAAAGTATGTTCTCAGCTACTAATATCAAGAGAATGAGAAATTGAGAACCCAACTTTGGGATCAGCATACTTACCTTGAAAATAGCAAAGTTGAGTTCTCGTTCTCATTATTTTGATATTAGCAGCTGAGAACACACTTTGCCC	TTCTCAGCTACTAATATCAAG	chr14: 22335461 22335481	21	vvi_miC343-3p	TTTTGATATTAGCAGCTGAGA	chr14: 22335562 22335582	21	vvi_miC343-5p in the same locus and complementary to vvi_miC344						VITIS-MIR36				grape-m0297
vvi_miC344	AAGTATGTTCTCAGCTACTAATATCAAGAGAATGAGAAATTGAGAACCCAACTTTGGGATCAGCATACTTACCTTGAAAATAGCAAAGTTGAGTTCTCGTTCTCATTATTTTGATATTAGCAGCTGAGAACACACTTTG	TCTCTTGATATTAGTAGCTGA	chr14: 22335484 22335464	21									va-miR044			miR082
vvi_miC345_V1-3p	TCGATCGTGTTTCACGTTGCTCCAGTCATTTTGATAGTTTGGTACATCCGGAAGATTTAAGGGAAAGTATGTTCTCAGCTACTAATATCAAGAGAATGAGAAATTGAGAACCCAACTTTGGGATCAGCATACTTACCTTGAAAATAGCAAAGTTGAGTTCTCGTTCTCATTATTTTGATATTAGCAGCTGAGAACACACTTTGCCCATGATTTAAATGATGAAAAAGTTGTGGCCAGCTCACAGGGTGCTGTTGGAAGGAAGGAAAGAAAGAAGAGTGA	TGATATTAGCAGCTGAGAACA	chr14: 22335565 22335585	21	vvi_miC345_V1-5p	TGTTCTCAGCTACTAATATCA	chr14: 22335459 22335479	21	Variant of vvi_miC345-3p in the same locus				va-miR033			miR048 / miR080											vvi-miRn007.1
vvi_miC345-3p	TGTTCTCAGCTACTAATATCAAGAGAATGAGAAATTGAGAACCCAACTTTGGGATCAGCATACTTACCTTGAAAATAGCAAAGTTGAGTTCTCGTTCTCATTATTTTGATATTAGCAGCTGAGAACACA	ATATTAGCAGCTGAGAACACA	chr14: 22335567 22335587	21	vvi_miC345_V1-5p	TGTTCTCAGCTACTAATATCA	chr14: 22335459 22335479	21	Variant of vvi_miC345-5p in the same locus													vvi-New36
vvi_miC345-3p	TCGATCGTGTTTCACGTTGCTCCAGTCATTTTGATAGTTTGGTACATCCGGAAGATTTAAGGGAAAGTATGTTCTCAGCTACTAATATCAAGAGAATGAGAAATTGAGAACCCAACTTTGGGATCAGCATACTTACCTTGAAAATAGCAAAGTTGAGTTCTCGTTCTCATTATTTTGATATTAGCAGCTGAGAACACACTTTGCCCATGATTTAAATGATGAAAAAGTTGTGGCCAGCTCACAGGGTGCTGTTGGAAGGAAGGAAAGAAAGAAGAGTGA	ATATTAGCAGCTGAGAACACA	chr14: 22335567 22335587	21	vvi_miC345-5p	ATGTTCTCAGCTACTAATATC	chr14: 22335458 22335478	21							VITIS-MIR3	miR003	Vvi-miRC75									Vvi-miRC75	vvi-miRn007.2
vvi_miC346-3p	TTGATGGAGCCATTTGGGAAATATATGGTTTTCAGAACCCAACTGAAATATGAAAATCAACTTTTAATGTGAAAAATTATATATTTTTTATGCACTCTGAGTCGG	ATTATATATTTTTTATGCAC	chr14: 22402191 22402210	20								VV-MIR028
vvi_miC347-3p	The authors do not report the precursor	TGGACCCTCATGACTTTAAAATGC	chr14: 24304257 24304234	24	vvi_miC347-5p	TGTGTTTTAAAGTCGTGAGGGTCC	chr14: 24304160 24304137	24							VITIS-MIR37
vvi_miC347-3p	GAATCCACTTTAATACCATTTGTAACGGTTTGGACGTTCTTGTGTATGTATTGACTGCTCTAGACTCAATGGACCCTCATGACTTTAAAATGCATCTACATAACTAAGAAAAGTTCATTGCATATACAGTGTTAGGAACTTTTCCCCTTTACCCTAATTATGTAGATGTGTTTTAAAGTCGTGAGGGTCCATTGAACCCAAAGTTGATAATATCTACACGGATGGGAGCAAGTCATTGCAAATGATATCAGGGTAGATTC	TGGACCCTCATGACTTTAAAATGC	chr14: 24304257 24304234	24	vvi_miC347_V1-5p	GTTTTAAAGTCGTGAGGGTCCATT	chr14: 24304157 24304134	24	Variant of vvi_miC347-5p in the same locus																		vvi-miRn117
vvi_miC348-5p	AGGCACTAGTGCTGAAGATCACTGTAGCATCATAGCAAGGGCATTGTTGCTGTATTGTAGCATATACTGCTAGGGTTTTGGCACTCTGGCACTGTATGGTACTCTAGCAATATTGTTATAGTGCCTGCTACAGTTCCAATTGCTACAATGCTACTGCAGTACTGCTACAGTGATCTCCCATACTAGTGCTTAT	GGCACTAGTGCTGAAGATCACTGT	chr14: 24343935 24343912	24	vvi_miC348-3p	AGTGATCTCCCATACTAGTGCTTA	chr14: 24343768 24343745	24																	c47995 / c50511
vvi_miC349_V1-5p	The authors do not report the precursor	GGGTTTTCTTTTCTCTGCGAGGT	chr14: 24532094 24532116	23	vvi_miC349_V1-3p	CTCGCAGAAACAAGAAAACCCGC	chr14: 24532126 24532148	23	Variants of vvi_miC349-5p and vvi_miC349-3p in the same locus							miR081
vvi_miC349-5p	The authors do not report the precursor	AGGGTTTTCTTTTCTCTGCGAG	chr14: 24532093 24532114	22	vvi_miC349-3p	CGCAGAAACAAGAAAACCCGCT	chr14: 24532128 24532149	22								miR066
vvi_miC350_V1-3p	ACCAACATTATCTGAACTCCACCCTCTTGGCTTCCCCAGCTTCTCCTTTCTTAAGACATTCGGATAAAGCTTAGAAAGGCCATGAGGGAGAGAGTTCAGATAAAGTCAATTT	CCAAGAGGGTGGAGTTCAGA	chr14: 24560651 24560632	20					Variant of vvi_miC350-3p in the same locus				va-miR070
vvi_miC350-3p	CTGAACTCTCTCCCTCATGGCCTTTCTAAGCTTTATCCGAATGTCTTAAGAAAGGAGAAGCTGGGGAAGCCAAGAGGGTGGAGTTCAGAT / AGAGAAATTGACTTTATCTGAACTCTCTCCCTCATGGCCTTTCTAAGCTTTATCCGAATGTCTTAAGAAAGGAGAAGCTGGGGAAGCCAAGAGGGTGGAGTTCAGATAATGTTGGTTTCTCT	CCAAGAGGGTGGAGTTCAGAT	chr14: 24560651 24560631	21	vvi_miC350-5p	CTGAACTCTCTCCCTCATGGCC	chr14: 24560720 24560699	22									Vvi-miRC21			miRC104*		vvi-New56*				Vvi-miRC21
vvi_miC351-5p	ATTGACTTTATCTGAACTCTCTCCCTCATGGCCTTTCTAAGCTTTATCCGAATGTCTTAAGAAAGGAGAAGCTGGGGAAGCCAAGAGGGTGGAGTTCAGATAATGTTGGTT	TCTGAACTCTCTCCCTCATGGC	chr14: 24560721 24560700	22	vvi_miC351-3p	CAAGAGGGTGGAGTTCAGATA	chr14: 24560650 24560630	21				VV-MIR057			VITIS-MIR24	miR007		novel_mir_57	vvi-miRC1446
vvi_miC351-5p	TAGAGAGTAAATAGGGAAGTTGTCAACCTCCCTCAAAGGCTTCCAATTTTCCTGGCTAATTATCAAGGTTAGAAAGTTGGAAGCCGGTGGGGGACCTTGAAAGCTTACCCCAGAATCAATATTACTCATCTG	TCTGAACTCTCTCCCTCATGGC	chr14: 24560721 24560700	22	vvi_miC351_V1-3p	CCAAGAGGGTGGAGTTCAGAT	chr14: 24560651 24560631	21	Variant of vvi_miC351-3p in the same locus																		vvi-miRn022a
vvi_miC351b-5p	AGGGAGACTGGCATTTTCTGAACTCTCTCCCTCATTGGCTTTCTAAGCTTGTCTGAACATCTAGAGAAAAGGGAGAAGCTGAGGAAGCCGTGAGGGAAGATTTCAGAAAATGTTGGATTTTCTCTCT	TCTGAACTCTCTCCCTCATTGGC	chr14: 24564127 24564105	23	vvi_miC351b-3p	CGTGAGGGAAGATTTCAGAAA	chr14: 24564055 24564035	21																			vvi-miRn022b
vvi_miC352-5p	GTAAAATTTCTCCAATTGAACTCCAAATTTCATATTTCTATCTTTTTTATTGAATTGAAACTTTAGAGATTTTGATTGGTGAAATTTACAGTCAAACAGCTTCGTCGAAGGAGTGACGCACAAGATCAGGCGCCAGATCGAGGATTT	GTAAAATTTCTCCAATTGAACT	chr14: 25027720 25027699	22																					c49354
vvi_miC353-3p	GTTCTGTTGACAGAAGATAGAGAGCACAACTGAACATACCCAAGAGGGCTTGTGTTTGAGCAGTCTTGTCCTCTCTCTTCTCCTGTCAACAGAAC	CCTCTCTCTTCTCCTGTCAACA	chr14: 26463744 26463765	22																			n_401
vvi_miC354-3p	TGCACTTTAAAATATATAAATTTCTTGTGTCAGAATACATGGAATGGGATATATATATATATATATATATCTGACATACTAATTCTTGACATATTCGGAATAGGTGCA	ATATATCTGACATACTAATT	chr14: 27330868 27330887	20																			n_284
vvi_miC355-3p	ACATGGATATGCCTGATTTTGAACATCTTTATTACTAATTTGATCACATAAATGGTGGTGTATATATAAATATGAAGGGATGGAAGCGCGATATATGGGAGCAATGAGAAGCAGTTGCAGAGAGTAAGGACTTTCAAAGACGGGAAGCTCAAGAT	GTAAGGACTTTCAAAGACGGGA	chr14: 28011494 28011515	22															grape-m1944
vvi_miC356-5p	GATGAAGGTGAGAATTGGAGGATAGCAAACAAATTTGGCATGGCATTAAGCTTCTGTAATTTGTTTGTTTGGTTTCCTCCAATATCTTATCTCCAAC	AGAATTGGAGGATAGCAAACA	chr14: 29265167 29265147	21															vvi-miRC2275a
vvi_miC357a-5p	Predicted secondary structure available at doi: 10.1111/j.1364-3703.2012.00815.x	TTTGACAGTGATTTTAGGAAG	chr14: 3123019 3123039	21										s1547786_1
vvi_miC357b-5p	The authors do not report the precursor	TTTGACAGTGATTTTAGGAAG		21										s1547786_2
vvi_miC357c-5p	The authors do not report the precursor	TTTGACAGTGATTTTAGGAAG		21										s1547786_3
vvi_miC358	The authors do not report the precursor	TTTGTTGATGGTTGTTGAAAA	chr14: 4225235 4225255	21												miR036
vvi_miC359a-3p	CACCTTTAGTATATATTGGAATTTGTGGAATTGTGAAATTATAGAAAATGTCTCTTCAAGTGACACCTTTTGTATAAATTAAAATTTTTAGGAATTGTAAAAGGTATATCTTCAAGAGACATCTTTAGCTTTAAAATCATGACACATTCAAATTTGTCAAATTGTGGAAGGTGTC	ATTTGTCAAATTGTGGAAGGTGTC	chr14: 6019136 6019113	24	vvi_miC359a-5p	CACCTTTAGTATATATTGGAATTT	chr14: 6019287 6019264	24														vvi-New44a
vvi_miC359b-3p	CACCTTTAGTATATATTGAAATTTGTGGAATGGTGGAATTGTGGAATTGTGGAAAGTGTCTCTTCAAGTGACACCTTTTGTATAAATTAAAATTTTTAGGAATTGTAGAAGGTGTCTCTTCAAGAGACATCTTTAGCTTTAAAATCAAATTCATGAGACATTCAAATTTGTCAAATTGTGGAAGGTGTC	ATTTGTCAAATTGTGGAAGGTGTC	chrUn: 9713061 9713038	24	vvi_miC359b-5p	CACCTTTAGTATATATTGAAATTT	chrUn: 9713226 9713203	24														vvi-New44b
vvi_miC360-3p	TGAAGCTGCCAGCATGATCTAAGCTTTTCTGTTGCCCACCCTTTCTCCAGGAAAGACTAGATCATGTGGCAGTTTCACCTGTT	GATCATGTGGCAGTTTCACC	chr14: 7137457 7137476	20																					c42264 / c43696
vvi_miC361-5p	AAAATGTTGAAAGCCTCGGTTACTTGTCTATCCTTACAAAGGCTATCAATGAGGGTGCTAAAGACGACTACGTTAGGCTGACAATTTCCTTGTTCCATGCTTCTAAGTAACCTGATAGCTGCACTAGTGTTACCCACTTTGCATAATCCATTTATCAGAGTTCCATATGTAACTACGTTGGGCTGAAAACCTTCCCCAATCATTTTATCAAACAAGTGGAGGGCTTCACCAATTTTACCCTCAACACACAGCCCCCTAATCAGAGTGGTGAAGGTCGTAGCGTCGGGTTGATGGCCAAGTTTGAGGATTTTGGCTAAAG	AAGCCTCGGTTACTTGTCTAT	chr14: 7970117 7970137	21														novel_mir_54
vvi_miC362-3p	AGATCCATTGATGAAGGAGATGAGGTATGTTTACATAAATACCCTAAATTGCTTCGGGTCCTGCACATGGACTC	CTAAATTGCTTCGGGTCCTGC	chr15: 10683840 10683860	21	vvi_miC362-5p	AGGAGATGAGGTATGTTTACAT	chr15: 10683811 10683832	22									Vvi-miRC22									Vvi-miRC22
vvi_miC363-5p	TGGAGGATTCTATCATGAACGCTCGAGCGCCTTTAGAGTGCTTGAGAGCTTGAGGTAGTTTTTAAAACACTTGAAAAAGTCATTTTGCTTAGTTTTAAAAACTCCAG	TATCATGAACGCTCGAGCGCC	chr15: 11940216 11940196	21															grape-m2704
vvi_miC364-5p	GGTCTACAATGTTACTTTTATCTGAATAGAAAAAACCAAAATATTAGGTTTTTTCTATTCAGCCAAAAAACAGACACCATCTAAATGTTATACCTTCTTTCTGTAGTCA	TTACTTTTATCTGAATAGAAA	chr15: 12867412 12867392	21									va-miR024
vvi_miC365-5p	CCTTTAGTATTAATTTGATTTTATGGTATTATGGAAATGATATTTCTTTAGTATAAATTCAATTTTTTTTTTAACGTGTATGACTAATAAAAAAAAAATGGAAAAGTGTCTTTCGAAGAGACACCTTTAGTATAAATTCAATTTTTTTTTAACATTTATAGTTGATATAAAAAATATAAAAGGTGTCTCTTCAAGAAATACCTTTGCAAAAAGTGCCGTAGATTTGAAATTATTTTTCAAAGT	TAATTTGATTTTATGGTATT	chr15: 14132306 14132325	20								VV-MIR049
vvi_miC366-5p	AATGTGAGGAAGGGTACGAAGAATGCAAAGATTTTTCATATTCTTCGTACCATTTGTCACATTCT	AATGTGAGGAAGGGTACGAAGAAT	chr15: 15517380 15517403	24	vvi_miC366-3p	TCTTCGTACCATTTGTCACATTCT	chr15: 15517421 15517444	24														vvi-New14
vvi_miC367-3p	TTTTTAAAAAAAGCCAGATTCTTAAAGTACAGACACTTTCTCTTTAAAAAGACTTTTGTATTTGGTTATATCCAAAAATTTAATTTTTATTTAATTATATTTTTTAAAGATATCAAAATTACCCATACTTTTAATAAAAATATTATTAAAATAAAATAGTAAAAGTATGAAATGAATGGTCCAACTCTAAAAAAACCTATTCTAAAATA	TCTGTACTTTAAGAATCTGGCTT	chr15: 15623667 15623645	23									va-miR042
vvi_miC368-3p	Predicted secondary structure available at doi: 10.1111/j.1364-3703.2012.00815.x	TTATATGGAGTGAGGATTACT	chr15: 16485459 16485479	21										s1453071
vvi_miC369-3p	GAGTCCATTGAGAAGGGATATGTTCTTGTCAATGCACATTTTGCTTCAATGGAGACACTCTCTTCTTCGCTTGAAACATCCCTGCAAGATAATCCTGCTGCTAGAGCTACTATCTACTCTCCAAATAAGAATGATGAGGATGTAGCTGTTGCAATGAAGACAA	TGATGAGGATGTAGCTGTTGCA	chr15: 16588413 16588434	22															grape-m2483
vvi_miC370-5p	GATTGCCACTTCTGTTTTCACTCTCATTAAGTAAGAATAGTGAGAATGAGTTGGGGAAGTGTTTAAT	TCTGTTTTCACTCTCATTAAG	chr15: 19955220 19955200	21	vvi_miC370-3p	TAGTGAGAATGAGTTGGGGAAG	chr15: 19955193 19955172	22									Vvi-miRC25									Vvi-miRC25
vvi_miC371-5p	TATGCTTGGAGTTCATTAGACAGAATTAATTGTTGCGTGCATGAATTGTTATATGTCCTGAGTTCATGCACACATAAATTAATTCTGTCTAATGAACTCTAACCATAAA	TATGCTTGGAGTTCATTAGACAGA	chr15: 2823996 2823973	24	vvi_miC371-3p	TGTCTAATGAACTCTAACCATAAA	chr15: 2823911 2823888	24														vvi-New66
vvi_miC372-5p	ATAGTCAAAGCCGTAGTCACCAACTACGGTTTTAAACTTAAAGTTAAAACCGTGGTTTGTGATTACGGTTTTGACCATTT	ATAGTCAAAGCCGTAGTCACCAAC	chr15: 5311485 5311462	24	vvi_miC372-3p	TTGTGATTACGGTTTTGACCATTT	chr15: 5311429 5311406	24														vvi-New35
vvi_miC373a-5p	AAGGACCCCCAAACATGAGTCTGGACCTTGATTTAGGTGCCAAGTCAGGCTGTCCAGTACTTTTTGCCAGGAGAGCGGTGTCTTTT	AAACATGAGTCTGGACCTTGA	chr15: 5644177 5644157	21													Vvi-miRC23									Vvi-miRC23
vvi_miC373b-5p	AAGGACCCCCAAACATGAGTCTGGACCTTGATTTAGGTGCCAAGTCAGGCTGTCCAGTACTTTTTGCCAGGAGAGCGGTGTCTTTT	AAACATGAGTCTGGACCTTGA	chr15: 5686573 5686553	21													Vvi-miRC24									Vvi-miRC24
vvi_miC374-3p	CAGCTTTCTTCTCATCTAAAGCAATGTTATGCTTTCTGTTCCATATTTCCCAAGGCATATATCTTTGATAAGAAAGAGCTGGT	TTTGATAAGAAAGAGCTGGT	chr15: 584436 584417	20	vvi_miC374-5p	CAGCTTTCTTCTCATCTAAAGC	chr15: 584499 584478	22														vvi-New91
vvi_miC375-5p	TCCAAAGATTTTGCTTCGGAAGGTTTACTTCAAGATGGCCACTTTTAAAAGAATTGAGAGTGTTCAATTGTGATAAAGTGGAGATACTATTTCAAGAAATAGGTTAGAAAAGTGAACTTGACAACAAAATTCAACAA	TTGCTTCGGAAGGTTTACTTC	chr15: 5849971 5849951	21															grape-m2616
vvi_miC376-3p	AGAATCTAGACATCTTATAATAGTTTTTAAGCACCACATTAGCCTACATGATTGGATCCAAGAAGACCAACTTGTAATAGAACATAAACCTTAATCAAGAATTGATATCAATTTTACGGTATTTTGGTAATAAACATTTTACTTACTTTTAATGTTTTTTATTTTATTTTATATATTTTTATTTAGTTAATATTTCCTATCGGGTGACATGTTTGAAACTATTCAATACTTGGTATGATCAAAGATGTTAGAAGATCGATTTTGTATGGATAATGTAGTAGTGGTGAAGGGTAGAGGGAAA	TAATGTAGTAGTGGTGAAGGG	chr15: 7804346 7804326	21														novel_mir_59
vvi_miC377-5p	CAGCGACCTTGGTGGTTATGGAGTGGGCTTGAAATGCAGAGTTTGGCTTATTCTGGAACACTCCAAATCAATGAGGTAGAGAAGCAG	GGTGGTTATGGAGTGGGCTTG	chr15: 8297145 8297165	22															grape-m2399
vvi_miC378-5p	ATAATAATTCTAAAACTCAATAAGTTACAAAAATGAGAAGTTGATTTTGTTCAAGATAATAAATTCACATGATAACATAAAATTGTGAAGCATCTATCAAATAAATTAATAAATGGAATTGTCATAGCGCCAAAGAAAAACAAACGAAAGCACAAGAAGGCATTAATGATACTTCAACGACTAAAAAAACCTCAACAGAACCCAACCAAACCAAAATGATTTACTAACACAAACAAAACCCACAATCTATAACTCAAAAATCTTCATTTATCA	AGATTTTTGAGTTATAGATT	chr15: 9933716 9933697	20								VV-MIR018
vvi_miC379-5p	CACCATTGAGAAAGGATCATCGGGCTGTTGCTGATTTTTTAGGATCACCGGGCTGCTGCTGATTTTTTTTCATCACTA	AAAGGATCATCGGGCTGTTGCT	chr16: 11236446 11236467	22															grape-m2885
vvi_miC380-3p	TCATCTAATATAACTAAAATGAACCTATTGATAACAAGTTCACTTTAGTTATGTTGGACGATG	TCACTTTAGTTATGTTGGACGATG	chr16: 12636084 12636107	24	vvi_miC380-5p	TCATCTAATATAACTAAAATGAAC	chr16: 12636045 12636068	24														vvi-New68
vvi_miC381-3p	TGCCCAAAAAATACCCTAGACAGCACCACTTGGTGATTTTGATTGCTTTCTCTAAATATAGACTAAATAAGGGTAATCAATTTTACCTATTATATGCTATAGTATATAGTATCTTAATCACCGAGTGGTGCTGTCTAGGGTATTTTTTGGGCCA	AAGTGGTGCTGTCTAGGGTAT	chr16: 14383575 14383555	21									va-miR091
vvi_miC382-5p	TGGAGACGTGTCGGAGAAGTGTGATGTGTATAGCTTTGGGGTTCTGCTGCTGGTTGTCATTGCTGGCCGACGGCCACTTCAGGTGACCGCCTCACCCATGGCGGAATTTCAAAGGGCAAATCTTATATCTTGGGCTCGGAACCTTGCCCGTGCTGGGAAGCTTATTAATCTGGTTGATCAGTCTATTCAGTCTTTGGACCGAGAACAAGCTCTCTTATGCATCATGGTTGCTCTCATCTGCCTCCAG	TCGGAGAAGTGTGATGTGTAT	chr16: 14731386 14731406	21													Vvi-miRC26									Vvi-miRC26
vvi_miC383-5p	GGCAACAAATTAAGAATACGTTTGACAGTGATTCTGAGAAATGTTTTTAGTCTTTCTAATACTTGAAAAATAAAAATTTTTAAGTGTTAAAAAAACTAAAAAAACTTTTCAAAATCATTCTCAAACGCACTCTAAATATCATA	AGAGTGCGTTTGAGAATGATT	chr16: 14754246 14754226	21								VV-MIR015
vvi_miC384-3p	TCAAACAAGTGATTCCTAAATGTCCTCTTAATAACTTAAACAATCTTATTAGGAGGACATTTAGGTATCACTCGTTTG	TTATTAGGAGGACATTTAGGTAT	chr16: 14895072 14895050	23												miR104	Vvi-miRC29	novel_mir_62								Vvi-miRC29
vvi_miC385-5p	Predicted secondary structure available at doi: 10.1111/j.1364-3703.2012.00815.x	AAGACTTAAGGACGATAAGGTTGC	chr16: 15616601 15616578	24										s38258
vvi_miC386-5p	GTCATAGACGTGCGGGTGGAAGAGAAGGAAGTTTTAATAATTTTGTGTGTGTTTTTTTTTTTCAGAAAAAGGCAGAAGGCTAGTTTGCACGATAGTTTCAACGCAGGCCTAAAGTTGACTTTTTGTTTGGGTCAAAGGCCATTCGATAGAACTCCGCTCGATTGCGTGCCTTTCCCCAGTTGGGCTCCTCGCCATATCTTTTTACCAAAATACCGTCTCACTAGACTTTCAAAAAGAGTTTAATGTTAAAATAATAAAAATGTTGTTTTCGACTTACATAAGAAGTTGTTTCCAATTTGTTTTTTTTTTTTCATGCGTAGGAGGGTATAACG	TGCGGGTGGAAGAGAAGGAAG	chr16: 17808731 17808711	21												miR051	Vvi-miRC30									Vvi-miRC30
vvi_miC387a-3p	CGACACGAAGAAACGAAAGCCGGCCAATGCAGTCCGAGAGATCACACAGCGAACTGTTCGAGTCTGGGCTTTTGTTTCTTCGTGTCGGT / GGCCGGAAAAGCGAGCTCGACACGAAGAAACGAAAGCCGGCCAATGCAGTCCGAGAGATCACACAGCGAACTGTTCGAGTCTGGGCTTTTGTTTCTTCGTGTCGGTCTTGCTTCTGTCTCCGGCC	CTTTTGTTTCTTCGTGTCGGT	chr16: 18836667 18836687	21	vvi_miC387a-5p	CGACACGAAGAAACGAAAGCC	chr16: 18836599 18836619	21												miRC106a		vvi-New58b
vvi_miC387a-3p	The authors do not report the precursor	CTTTTGTTTCTTCGTGTCGGT	chr16: 18836667 18836687	21	vvi_miC387a_V1-5p	TCGACACGAAGAAACGAAAGC	chr16: 18836598 18836618	21	Variant of vvi_miC387a-5p in the same locus						VITIS-MIR50
vvi_miC387b-3p	CGACACGAAGAAACGAAAGCCGGCCAATGCAGTCCGAGAGATCACACAGCGAACTGTTCGAGTCTGGGCTTTTGTTTCTTCGTGTCGGT	CTTTTGTTTCTTCGTGTCGGT	chr16: 18867640 18867660	21	vvi_miC387b-5p	CGACACGAAGAAACGAAAGCC	chr16: 18867572 18867592	21														vvi-New58c
vvi_miC387b-3p	GGCCGGAAAAGCGAGCTCGACACGAAGAAACGAAAGCCGGCCAATGCAGTCCGAGAGATCACACAGCGAACTGTTCGAGTCTGGGCTTTTGTTTCTTCGTGTCGGTCTTGCTTCTGTCTCCGGCC	CTTTTGTTTCTTCGTGTCGGT	chr16: 18867640 18867660	21	vvi_miC387b_V1-5p	CGACACGAAGAAACGAAAGCCG	chr16: 18867572 18867593	22	Variant of vvi_miC387b-5p in the same locus											miRC106b
vvi_miC387c-3p	CACGGAGAAACAATTGCCCATGCAGTTTGGGAGATCACAGAGCGAACTGTTGGAGTCTGGGCTTTTGTTTCTTCGTGTC	CTTTTGTTTCTTCGTGTC	chr16: 18857857 18857874	18	vvi_miC387c-5p	CACGGAGAAACAATTGCC	chr16: 18857796 18857813	18														vvi-New58a
vvi_miC388-3p	TCTCTGTTTGGCTCCCGAGAAAACGGAGGAAACTGGTGAAATTTTTTTGAATCTTGTGTTTAGTGTTGTCTTGGTTTCTGAAAAGTGAAATAGTAACCCTGACTGAGCAGTTGACTGCAGGTTTCTTTGTTGTGCTTTGTTTTTCTCGTGTTCCGACCTGAGAATTTCGATTTGTTTTCCTTTCCTGCGGTTTCTCGGCGACCGAACGGAGG	TTCCTGCGGTTTCTCGGCGAC	chr16: 19208189 19208169	21													Vvi-miRC31	novel_mir_63								Vvi-miRC31
vvi_miC389-3p	AAGTTGACTTCCTTCCTGCATTTGATTCTGTTCTGGTTAGTTACATTCATACTCCAGCTAAATTCTTCAACACTTTTACTTCATTTTTGTGTGTGACGGCTTGCAATTTATTAGTACTTATTGGCTAGTATGCCATCTTTCTTAGATTCCAAGACTTGGTAAAGTATACTGCTTGGAGATTGATGATTTTTTGAGTTTGACTTAGTGTTCAATTGGAACATGAAAACGTGACTGAATTGGTCCTAGTTACTCTTCGGGACGGAGTGGAAGAGGGGAGGAGATTCTAAACT	ACGGAGTGGAAGAGGGGAGGAG	chr16: 19451471 19451492	22														novel_mir_60
vvi_miC390	CTTATCCAAAAAAACAACAATAAAAACAAAAACAAAAAAGAAAAACAAAAACAAATATATAGCATAGGGAAGGAGTAGTAGTTTTTGCCTCAAAGATGACAAAATTATAATAATAGTGAGAATGACTTTTTTGGTGATATTTTAAAGAGCAAAATAATTTGTCAAAGATATGATGCAACTTGTATATATGTGTGTTAGTGTTTTTGTTTTGTTTTTTGTGTGATTCACATTTGGATAAGTT	TTTTGTTTTTATTGTTGTTTT	chr16: 20697588 20697568	21									va-miR002
vvi_miC391a-5p	ATTTTTTTTTAAAGTGCGTTTGAAAGTGATTATAGAAAAAGTTTATAATATTTTTAATAC TTAAATGATAAAATTTTTTAAATATTAAAAATATTAAAAACACTTTTTAAGATTATTATCAAACGAACTTTTAAAAAAATT	AAAGTGCGTTTGAAAGTGATT	chr16: 20701302 20701322	21								VV-MIR002a
vvi_miC391b-5p	ACGTACTCTAAAAGTGCGTTTGAAAGTGATTTTAAAAAAAGTTTATAATATTTCTAATATTTGAATGATGAAAATTTTCAAGTATTAAAAATAATAAAAACGATTTTTATAATCACTATCAAACGAGCTCTGAGTCTT	AAAGTGCGTTTGAAAGTGATT	chr19: 6804216 6804236	21								VV-MIR002b
vvi_miC392_V1-5p	Predicted secondary structure available at doi: 10.1111/j.1364-3703.2012.00815.x	CGATACCATGTGGAAAAGAGGAA	chr16: 2126230 2126208	23					Variant of vvi_miC392-5p in the same locus					s774661
vvi_miC392-5p	TCATATGTTGACACCAAGAGGAAGTTTGGAACGGTGGAATAGATAATGGAAATGGGAAATCAATTCAATTCCTATTCATTAACATGTTCGAATTGTTCTTCTAAATGGGAATAAGAACAA AAAATTAATTGTTGCGGAAATCAAATTTTACTCTTATTAGGATTCTGATTCCTCTTTTCCACATGGTATCGTAATTTACC	ATACCATGTGGAAAAGAGGAATC	chr16: 2126228 2126206	23									va-miR083
vvi_miC393-3p	The authors do not report the precursor	AATCAAAATCCTAATACGAGTAGG	chr16: 2126373 2126396	24	vvi_miC393-5p	TACTCTTATTAGGATTCTGATTCC	chr16: 2126188 2126211	24							VITIS-MIR4
vvi_miC394-5p	The authors do not report the precursor	AAATATTCACCAAATTAGTCTTC	chr16: 2127090 2127112	23	vvi_miC394-3p	TGCACTAGTTTGGTGAATATTTTC	chr16: 2127232 2127255	24								miR049
vvi_miC395-5p	CTTTAAAAAACTTTATGGTGAAACCAAACATGACCATTTTTCTCAGCATTTTTTTATTTCCTTAGTACTTTCCAGGAATCAAACATAGTCTTAGGTTATGTTTGGTTCCTGGAAAATACCAAGGA / AGGCTATGTTTGATTCCCGGAAAATTTGAGGGAAAATGTAAAAGAAAGAAAATAGAGAGGAAAAGTGAAAAAAAAAAAAAATGAAGGAAAATAAAAAATAGATTCAAAATCAATAACTTATTTTTATATGTTTTTTTAAACTCATTTCACGTAGTTTCTTCTATTATATAAAGATTAATAATTTTAAAATATATAAATTTCTAACTAATTTTAATTATATTTAATTTTCTTTAAAAAACTTTATGGTGAAACCAAACATGACCATTTTTCT…	CTTAGTACTTTCCAGGAATCAAAC	chr16: 21445109 21445132	24	vvi_miC395-3p	TTGGTTCCTGGAAAATACCAAGGA	chr16: 21445150 21445173	24																	c53763		vvi-miRn075
vvi_miC396-5p	TTGGTTGCTGTGAAATGTAGGCAAGGAAAAGAAATATGAGTTCTAAATCTTGGATTTTTCATTGCATGGGGTTCAAGGGAACACAAGACCCGTCTTAGTTCAGGGAGGATACCATTGTTTTTGGGAGGAAAATCAAGGAGACTCAAGTTTGTGTTTTTCTTTTTCTTTCCCTGTGGTTTCTTGGTAGCCAAG	TGAAATGTAGGCAAGGAAAAG	chr16: 21954910 21954930	21								VV-MIR059	va-miR039					novel_mir_61
vvi_miC397-5p	Predicted secondary structure available at doi: 10.1111/j.1364-3703.2012.00815.x	CTACTGATTAACTTGAATAGCAGC	chr16: 248409 248432	24										s836623
vvi_miC398-3p	TTCCCACATAAAACCTTGAATATTCTGCCAACGTAAAACCATTAATCCTAAGATGTCACATTGGCAGAATATTCAAGGTTTTATGTGGGAA	ATTGGCAGAATATTCAAGGTTT	chr16: 3111507 3111486	22												miR050	Vvi-miRC28									Vvi-miRC28
vvi_miC399-5p	GTGCGATATATTAGGATGGTGAGAAAGAGTGTTGTTGAGGTATTTTTGATTAAAACTTTGCTATATTTTATCATTACTCTCTAGATATTTTGGTTTGTATCTTGGCATG	TTAGGATGGTGAGAAAGAGTG	chr16: 3217519 3217539	21															grape-m2830
vvi_miC400-3p	TCTCAATAAAAAATACTACTCTTGAGCCATCATTGCTGAAAAAAACTCAATTGATTACCAACTTACAATAATAACTATCAATTATGTATATCAATTCCTTGATATTAATAAAACTAATAAATATGTTTGGATTAAATAATTTTTAAAAACTTTTAAATTTAGTTTTAGCAAAGAAGTTGATATTTAAAATAACAAGAAATTAATAACAAAATTCTCTCAAATCATTTAGAGCCTGTTCAGTAGTGATTTTAGGAAGCGTTTTTATCCCTTCT	TAGTGATTTTAGGAAGCGTTT	chr16: 430152 430172	21									va-miR053
vvi_miC401-3p	CCAAAACAAACCCCACTTCCCTTCCCCATGGCTCTGATACCATAGACACCCAGGACACCCATGGTATCAGAGCCATGGGGAAGGGAAGTTGGGTTTGTTTTGGGT	AGGGAAGTTGGGTTTGTTTTGGGT	chr16: 4951078 4951101	24	vvi_miC401-5p	CCAAAACAAACCCCACTTCCCTTC	chr16: 4950997 4951020	24														vvi-New28
vvi_miC402-5p	TTTGTTGCACAACAAATGCTTGATTAAATGTGGATGAGAAGACAACACAAAATGGGTGTCTTCGGAGTGTGAATCATTTTGAAAGGGGTTCTTTGTAGTTTAAATATGAGAACCCATATAGTGTTTATTGAAATTCCAAAGACTCGTGTTATGTTTAATAGGCTCTATTTGTTGTTAAAG ATATAA	AACAAATGCTTGATTAAATG	chr16: 5073063 5073082	20									va-miR095
vvi_miC403_V1-5p	The authors do not report the precursor	AATGACGAGATTGATTTTCAATCA	chr16: 5413761 5413738	24	vvi_miC403_V1-3p	AATGTTTGAAAATCAATCTCAATC	chr16: 5413798 5413775	24	Variants of vvi_miC403-5p and vvi_miC403-3p in the same locus						VITIS-MIR5*
vvi_miC403-5p	The authors do not report the precursor	AATGACGAGATTGATTTTCAATC	chr16: 5413761 5413739	23	vvi_miC403-3p	ATGTTTGAAAATCAATCTCAATC	chr16: 5413797 5413775	23							VITIS-MIR38
vvi_miC404-5p	GCTTACAAGGTGCCAAATTTCATACATTTTCGTATAAATATTGTCTGCTTTAGGTCCACTAGCCCTCACAACTTTAAAATATGTCTACAAATACCAGATGAGTCATCCCTTATAATAGTGTGAAAGAAAGCTCTTGACATTTATAAGGACAACTCTTCTAGTATGCGTGTAGTTAGATGCGTTTTAATGGCGTGAAGGCTAATGGGTTCAAAGTAGACAATATTTATACGAGTAATAACAATTTCGGCCAATGGGTTCAAAGTAAGC / TTTCGTATAAATATTGTCTGCTTTAGGTCCACTAGCCCTCACAACTTTAAAATATGTCTACAAATACCAGATGAGTCATCCCTTATAATAGTGTGAAAGAAAGCTCTTGACATTTATAAGGACAACTCT…	AATATTGTCTGCTTTAGGTCCACT	chr16: 5436218 5436195	24	vvi_miC404-3p	TGGGTTCAAAGTAGACAATATTTA	chr16: 5436052 5436029	24						s56731										c93754	c49286 / c59267 / c62799 / c61111		vvi-miRn040
vvi_miC405-3p	CAAAGAATGTGAGGAATCCTCACATTCCTCATATCTTTTCCATTTCTTCACTTCTTTGAAGTTTTTTTTTTTAAAAAAAAATTGGGATCTCATATGACTTAGATATTGTTTAGATAGGTTCATTACACTTAAGGGGTGTTCAATGGATGCCGAAAAAATCAAAATCCAAAAATACTAAAAAATTAGTAAAGGTACGAAGAATGTGAAGAATCCTCACATTCTTGG	CGAAGAATGTGAAGAATCCTC	chr16: 6881182 6881202	21								VV-MIR034
vvi_miC406-5p	ACGGTAGTATCAAAGAAAGAAAGCTGGCAATCTGAAATTACAAGGGGAACAAATAGGCAATAGAAAGGACTATCAAATTGTTTTGTTTGGTTTGTCATGGGAGTGAACTGTTTAAAAACTTACACCTGTGCAAATTCTTCAAGCTCTCTATAAAACGGAATTTGAGAAAGAATAAATTTGCTTTGCTCATGCTTTTTTTTTTTTTTTTAATTTT	CAAAGAAAGAAAGCTGGCAATC	chr16: 7129723 7129702	22															grape-m3054
vvi_miC407-5p	TGTTTGGTTAGTGATGGGATATGATAAGTTATCCCATCACTTATCATATCCTCTGTTTAACCAAACATG	TGTTTGGTTAGTGATGGGATA	chr16: 9486787 9486807	21	vvi_miC407-3p	TCCTCTGTTTAACCAAACATG	chr16: 9486835 9486855	21														vvi-New82
vvi_miC408-5p	AAGTTTTAACCCGCTGTTTGGTTGCCGAGAACATTTAGAAAAAGAGAAGAGACAAAAATGCTGAATTTTCAAAATTTACATATCCGCACTGAAATGGTAAGCAAAACAGCAAAAAAAAATTAAAATAAAAATGAAATTAAAAATAAAACGAGCTCAAACTTCATTTTCCATTTTCCTTTT CCTGAGTTTTCTCGGCGTCCAAACAGAGGGTTTAACTG	TCTGTTTGGACGCCGAGAAAA	chr17: 10447952 10447932	21									va-miR040
vvi_miC409	The authors do not report the precursor	GGCTGGAGTAGGAGGAAAGGCA	chr17: 11786679 11786700	22												miR068
vvi_miC410-3p	The authors do not report the precursor	TATCTTATCCCATCACCAACCAAA	chr17: 13207662 13207685	24	vvi_miC410-5p	TTGGTTGAACATAGGATAGGATAA	chr17: 13207624 13207647	24							VITIS-MIR2
vvi_miC411-3p	ACCTACTATTGTCATTGTTCAAAATTATGTCGGAGGTGGCTTCTCAAAACTTGAAATTCAAAGAGGTTCTCTTTGTGGTCAAGATTCAATTAAGGTTGGAGAGACCACCTAGTCCTGTTAAGACCAAGTTTAAGGGCCTAAGCTCGAGAGGGGCTTAGGTTTGGGGGAAGTTCTTTATGGAATTGCCTCAACCATTTTCCAATAAGGTTTTATTCCCTAACTCCCAAAACCTAAGCCCCTCTTAGAATTAGGTCTATAAACTTGATCTTAACAGGAGTGGGTGGTCTTTCCTGCCTTCACTGATTCCTGACCACAAAAAAATCTCCTAGAATTTTCACAATTTGAGAAGCCACCTCTGATGTAATTCTAAACAATGACATGTAGTAGGT	TTAACAGGAGTGGGTGGTCTTTCC	chr17: 1873859 1873836	24	vvi_miC411-5p	AGAGACCACCTAGTCCTGTTAAGA	chr17: 1874027 1874004	24						s1434076													vvi-miRn051
vvi_miC412-3p	Predicted secondary structure available at doi: 10.1111/j.1364-3703.2012.00815.x	ATTGAACTCATGTGCAAGCTCAAA	chr17: 2325378 2325355	24										s480274
vvi_miC413-5p	AGTCCAATAGAGGGTCTTACTGGGTAGATTGAGCTGCTGACTTATGGATCCCACAGCCCTATCCCGTCAATGGGGGGCATTGGATAGGCTTGTGGCTTGCATATCTCAGGAGCTGCATTATCCAAGTTTAGATCCTTGTTTGGATTG	AGGGTCTTACTGGGTAGATT	chr17: 2609363 2609344	20	vvi_miC413-3p	TATCCAAGTTTAGATCCTTG	chr17: 2609255 2609236	20	vvi_miC413-3p in tandem with the known vvi-miR159c										grape-m3409
vvi_miC414-5p	TGCCATTGACGGCGTCAACCAGCAACTCTCGCGGTCATTGATGATGGCGGCAGCGGAAGCACTACTAGCGTAGGGAGAGACGTTGAGGAGGGGCGGGAGGGAGGCCGATGAGGGCGAGGGCGACTCAACTCTGGGTAGAGGGGTCTCTTCCTAAGCTAGTGCTTCTACTGCCGTCAATGACCACGAGAATTGCTGGTTGCCGCCGCTAATAGC	GTCAACCAGCAACTCTCGCGG	chr17: 2693744 2693724	21	vvi_miC414-3p	ACGAGAATTGCTGGTTGCCGC	chr17: 2693575 2693555	21										novel_mir_65
vvi_miC415-5p	GGCGCACCCGAGAAACGCCTTTAAAAACTTGGGTTATAATTGTGTTAACAAGTTATTATCATGTTAATAGGTTATTGACGTTCGACTTAACTCATTTATTAAACGAGTTAAATGGGTCATATCATGTTACTTATGTAATAAATAGGTTGTGTTCATGTCAAGATCCAAATTTTTAAAGGCGTTTCTTGGGCGCGCCT	AGAAACGCCTTTAAAAACTTGG	chr17: 2735653 2735674	22	vvi_miC415-3p	AAATTTTTAAAGGCGTTTCTTG	chr17: 2735809 2735830	22				VV-MIR011
vvi_miC416-3p	GGTGATGTTGTTGACAGAAGATAGAGAGCACAGATGATGATGTGCATGGAGTTTGCATCTCACTCCTTTGTGCTCTCTAGACTTCTGTCATCACCTCAGCC	GCTCTCTAGACTTCTGTCATC	chr17: 3046335 3046355	21																			n_520
vvi_miC417-3p	GGAGGCCTTGTATGAAGATAAAGAGTCTCGTCTGGTAGCCAAGGATGACTTGCCTAAATCCACCAGGTTTCAAAACACTGAATGTAATTATCCACAAAGCGATTCCGTGGTCTTTAGGCAGTCATTCCTTCGGCTAAACTGACCGGCTCTTATCTCTCATGCGAGACCTAC	TGACCGGCTCTTATCTCTCATG	chr17: 355722 355701	22	vvi_miC417-5p	TGAAGATAAAGAGTCTCGTCTGG	chr17: 355849 355827	23	vvi_miC417-5p in tandem with the known vvi-miR169x			VV-MIR063	va-miR036			miR053	Vvi-miRC34									Vvi-miRC34
vvi_miC418-5p	ACGGCCAAAGGAGGTGATAGATCAGCAAGAGATTCTCAACATGGAAAATGAAGAAAACAAATTTCTTGAATTCAAGTCCCTCAGTGAAGCTGTGCTTGATCTCAGATCACTTCCAGGGGCACGA	GAGGTGATAGATCAGCAAGAG	chr17: 3771933 3771953	21																	grape-m0642
vvi_miC419-3p	TGATTATGGACCCGTTTGGCTGCTGGGAAAGCGTGGGAAAACAGTTGAAACTCAGGAACCTTCTTAATTACATCATGAAGTGGGACGGGCTGTTGCATGATTCCGGGTTTCCTTTCCTTTTTCCTATGATTTCTTGGCAAGCAAATAGACCATGTTCA / CCCGTTTGGCTGCTGGGAAAGCGTGGGAAAACAGTTGAAACTCAGGAACCTTCTTAATTACATCATGAAGTGGGACGGGCTGTTGCATGATTCCGGGTTTCCTTTCCTTTTTCCTATGATTTCTTGGCAAGCAAATAGA	TTTTCCTATGATTTCTTGGCA	chr17: 4716823 4716843	21	vvi_miC419-5p	CTGGGAAAGCGTGGGAAAACA	chr17: 4716727 4716747	21					va-miR004			miR052 / miR084	Vvi-miRC32									Vvi-miRC32	vvi-miRn074
vvi_miC420-5p	CGGCTAGTGGGCAAGGGAGATGATGGTTTGATCCAACGGTGGAGAAGATAGTTAGGGTTGAAGTTTACACTATATAAAGAGAGAGGTGCAGAATAAAGGTGCTATTGGGAAAAATGGTAAAGGGTGGAGTTTTGTGAAGCTTATGGCATATGTGTGACGGAAAGAAAGGTGTTTAAATCATGTCTTTCCGACTCGCACTCATGCCGTTGGTTTCAGATCACTCCTCCCTCTCCCTCCT	GTGGAGTTTTGTGAAGCTTAT	chr17: 5681310 5681290	21	vvi_miC420-3p	TGGTTTCAGATCACTCCTCCC	chr17: 5681226 5681206	21	vvi_miC420-3p in tandem with the known vvi-miR3634-3p										grape-m0534
vvi_miC421-5p	Predicted secondary structure available at doi: 10.1111/j.1364-3703.2012.00815.x	CCCTTTGGGTCAAAAGCGGACAAT	chr17: 571012 571035	24										s710066
vvi_miC422-3p	TTCCTGTTCTTCCTCTTCCCCATTTCCGTTCATTCCATTCTTTTTCTCTAGTTTAATTTCGAGAGAGAAAAAGAGAGGGAGCAACATGACCGCTGTGATGGTTAGTTAAAATTGAAGTGGGAGAGAGGAATAAGATGAATGGAAGGCGAAGAGGATGGGTAGGTA	TGAATGGAAGGCGAAGAGGA	chr17: 6445088 6445069	20															grape-m3453
vvi_miC423-3p	TTACAGGATCAATGAGCTAATCCTAGGTATGTTTCTAATGGAAAATCCATAACATACACACTTATTTTTACCAGATAAAAGGAGTTAGTATACATCCCATATCCTTTTATTAAGGGGGCGACTTCTTAGAAACTTGATAAACAAGTTAAAGTGATATACTAGAACTCCATATATATTAAAGTGTGTTTGATAGTGATTCTAGAAAACGTTTCTAATCTTTTTAACACTCGAATGATAAAAATTTTCAAGTGTTAAAAATATTAGAAACATTTCCTAAAATCATTGTCAAACGAGCTCTAAGTTT	CTAAAATCATTGTCAAACGAG	chr17: 6698480 6698500	21									va-miR064
vvi_miC424-5p	ACCACTGTCTAAAAGGTTCATGAGATAAGTCTGCTGCTCCATATCTTAAGCAGTTCAGCTAGCATGAAGATCTTGTCATATGCTTGAGGCATTGAGTAGTGGACTATCGCATGAAGTCTTTAGGCAGTAATGA	TGAGTAGTGGACTATCGCATG	chr17: 7265186 7265166	21	vvi_miC424-3p	TGAGATAAGTCTGCTGCTCCAT	chr17: 7265258 7265237	22				VV-MIR065	va-miR034			miR038 / miR085	Vvi-miRC36		grape-m3469							Vvi-miRC36
vvi_miC425	The authors do not report the precursor	TCTTGACGAGTTGGAGTATGA	chr17: 7490722 7490742	21												miR037
vvi_miC426-5p	Predicted secondary structure available at doi: 10.1111/j.1365-313X.2010.04208.x	TGCAGAGGAAGGAGGAAGAGGA	chr17_random: 526192 526213	22							miRC42
vvi_miC427a_V1-5p	TTTTTAACATTACTATTAGCATCACTAGAATCCTCTAAGAAATATAATCATATCTTATTATTATATTTCTTAGAGGATTCTAGTGATGCTAATAGTAATATAAAAG	GAGGATTCTAGTGATGCTAAT	chr18: 10484199 10484179	21	vvi_miC427a_V1-3p	TAGCATCACTAGAATCCTCTA	chr18: 10484253 10484233	21	Variants of vvi_miC427a-5p and vvi_miC427a-3p in the same locus							miR039a*											vvi-miRn093
vvi_miC427a-5p	AACATTACTATTAGCATCACTAGAATCCTCTAAGAAATATAATCATATCTTATTATTATATTTCTTAGAGGATTCTAGTGATGCTAATAGTAATATA	AGAGGATTCTAGTGATGCTAA	chr18: 10484200 10484180	21	vvi_miC427a-3p	AGCATCACTAGAATCCTCTAA	chr18: 10484254 10484234	21	vvi_miC427a-5p and vv_miC427a_v1-5p in the same locus and complementary to vvi_miC427b_V1-3p and vvi_miC427b-3p			VV-MIR014a				miR010a
vvi_miC427b_V1-5p	The authors do not report the precursor	GAGGATTCTAGTGATGCTAAT	chr18: 10484237 10484257	21	vvi_miC427b_V1-3p	TAGCATCACTAGAATCCTCTA	chr18: 10484181-10484201	21	Variants of vvi_miC427b-5p and vvi_miC427b-3p in the same locus							miR039b*
vvi_miC427b-5p	AACATTACTATTAGCATCACTAGAATCCTCTAAGAAATATAATCATATCTTATTATTATATTTCTTAGAGGATTCTAGTGATGCTAATAGTAATATA	AGAGGATTCTAGTGATGCTAA	chr18: 10484236 10484256	21	vvi_miC427b-3p	AGCATCACTAGAATCCTCTAA	chr18: 10484182-10484202	21	vvi_miC427b-5p and vvi_miC427b_V1-5p in the same locus and complementary to vvi_miC427a_V1-3p and vvi_miC427a-3p			VV-MIR014b				miR010b
vvi_miC428-5p	GTAAATTACGATACCATGTGGAAAAGAGGAATCAGAATCCTAATAAGAGTAAAATTTGATTTCCGCAACAATTAATTTTTTGTTCTTATTCCCATTTAGAAGAACAATTCGAACATGTTAATGAATAGGAATTGAATTGATTTCCCATTTCCATTATCTATTCCACCGTTCCAAACTTCCTCTTGGTGTCAACATATGA	ATCATGTAGATATTGTCCGCT	chr18: 11163144 11163124	21									va-miR081			miR009 / miR067	Vvi-miRC27									Vvi-miRC27
vvi_miC429-5p	TTTTCTTTTAATTAATAGATTGTCAAGTGTTGGTGCACCATGTAGACATAGGGATAAAATTGATCGCGGAAGCACATTAAAAATTAAAAATATTGTGTTTTTCTTTATTTTCTATTCGTGTATACATGATTTTGTTTTTTAAAAAAAAC	ATTAATAGATTGTCAAGTGT	chr18: 12957874 12957855	20															grape-m3966
vvi_miC430_V1-3p	GGTCTGCTTGGCTTCACCGCTGCTAGAGCTCGCGATCTCCTCTACGTGTTGGCCCTACCTGCACAAAGGACACTCTAGGTAGGTTCCCGAGGACACTATAGGATCGTGAGCTCTAACATTGGTGAAGCTAGGTTGAT	TGAGCTCTAACATTGGTGAAG	chr18: 13887274 13887294	21					Variant of vvi_miC430-3p in the same locus										grape-m0563
vvi_miC430_V2-3p	TTCACCGCTGCTAGAGCTCGCGATCTCCTCTACGTGTTGGCCCTACCTGCACAAAGGACACTCTAGGTAGGTTCCCGAGGACACTATAGGATCGTGAGCTCTAACATTGGTGAAGC	CGTGAGCTCTAACATCGGTGA	chr18: 13887272 13887292	21	vvi_miC430-5p	ACCGCTGCTAGAGCTCGCGAT	chr18: 13887183 13887203	21	Variant of vvi_miC430-3p in the same locus. In bold nucleotide that differ from the reference genome																c63008
vvi_miC430-3p	TTGGTGGTCTGCTTGGCTTCACCGCTGCTAGAGCTCGCGATCTCCTCTACGTGTTGGCCCTACCTGCACAAAGGACACTCTAGGTAGGTTCCCGAGGACACTATAGGATCGTGAGCTCTAACATTGGTGAAGCTAGGTTGATCATGAA / GGTTATTTAGATAGAATGTGTTGCTACTGAACTTGGTGGTCTGCTTGGCTTCACCGCTGCTAGAGCTCGCGATCTCCTCTACGTGTTGGCCCTACCTGCACAAAGGACACTCTAGGTAGGTTCCCGAGGACACTATAGGATCGTGAGCTCTAACATTGGTGAAGCTAGGTTGATCATGAA CTTCCGAAGTAACAAAATAACC	CGTGAGCTCTAACATTGGTGA	chr18: 13887272 13887292	21	vvi_miC430-5p	ACCGCTGCTAGAGCTCGCGAT	chr18: 13887183 13887203	21				VV-MIR036												c120194	c80481 / c78576		vvi-miRn002
vvi_miC431-5p	GGGTTTGACAAAGGGTTTCTCACAGAGTTTATTGGCATTCTGTCCACCTCCCATCTCTTGAAAATCTCTCTTTTCTCTCTGTGGAGGTGGGCATACTGCCAACCAAGCTCTGTTGGACTCTCTTTGTAAAACCCT	AAGGGTTTCTCACAGAGTTTA	chr18: 1413141 1413121	21	vvi_miC431-3p	AGCTCTGTTGGACTCTCTTTG	chr18: 1413046 1413026	21	vvi_miC431-5p in tandem with the known vvi-miR394b			VV-MIR079	va-miR093				Vvi-miRC39									Vvi-miRC39
vvi_miC432-3p	AGCTCTCCCTAAGAAGAGTTCTTGTTGTTCTCGATGACGTAGATAATTTGAGACAATTAGTACATTTGGTGGGGAAGCA	TGAGACAATTAGTACATTTGG	chr18: 21091503 21091523	21								VV-MIR064
vvi_miC433-5p	AGAGCCTGGCAAATGGAGTAGATTGTGGGAGCCTAAGGATGTCTTTCATGTATTAACAAGAAATACGGTATGTAAGAGCTAAATACATGAACTCACTTGGATTTTATTGGAATATCTGTAATCTTCAGTGAATTTTTTTTTTTTTTGTTGAGAAGTTACATATTGTATTATATTTGTAAGCTTTTATAAGTTTTTGGTTTTGCTTATTATTGGCTTTT	AAATGGAGTAGATTGTGGGAG	chr18: 21213321 212133241	21														novel_mir_66
vvi_miC434-3p	Predicted secondary structure available at doi: 10.1111/j.1364-3703.2012.00815.x	TTTTGTGACACATGAATCCAAGTT	chr8: 21859525 21859548	24	vvi_miC434-5p	CTTGGATTCATGTGTCACAAAATC	chr8: 21859603 21859626	24						s1565394
vvi_miC435-3p	CTTGGACTTGTCTATACCAAAGTGGATATACATTACTACTAAATCCTTTGCAATGATGAAGAATCTTAGGTTGGTCAAAATATATTTGAATCAGGAATCCACTTCTATGAGGGAGTATAATAAAGTTGTCCAAAGACTTTGAATTCCTTATGAGCTAGATATCTCTATTGGCATGGATATCCTTT	TAAGATATCTCTATTGGCATG	chr18: 23054649 23054629	21															grape-m4051
vvi_miC436-3p	Predicted secondary structure available at doi: 10.1111/j.1364-3703.2012.00815.x	CTCAATGAGTATAGGCAGCAAA	chr18: 23125476 23125497	23										s848638
vvi_miC437-3p	AAGAATTTCAAGAGACTCCATATGGATGCTGCTTGGGAAGCTCTTGAGTTTCTTTCAGCCùTTTTAAATTCAGGAAAAATAGGCTGCTTGAGAGCTCCAATGGATGGGTGAACCTCT	CTTGAGAGCTCCAATGGATGG	chr18: 24586828 24586848	21															grape-m3778
vvi_miC438-5p	TGAAATACATAATTTAATTGGTTCAAATTTAAAAAACCAATATTTTGTTAGAGAAATTTAAAAATTATACACATAAATTTTAATTGGAATTTAATAATGAAATAAAAAAAATTTGGGTGGAAATTAAAATTAAACCAGAAATAAAAAATAATTTTAAGCGGAATATTTAAACCAATTTAC CATAATATTTAAA	TGGTAAATTGGTTTAAATATTC	chr18: 25593258 25593279	22									va-miR026
vvi_miC439-3p	ACCAAATAAATATTATTTACTGTACATTCAACAATACTCCGGACTTTAAAACAAATTTACAAACTTATGAAAAACATGTGTGTGTATATGTATATGTATCTATCAATTTTGATATCTCATACTAAATAAGAGAAAAAGTTTTGATATTGTATATGTATGTGTTCTTAACCAAGTAAATGTGTTTTAAAGTCGTGAGGATTTATTGGG	TGTGTTTTAAAGTCGTGAGG	chr18: 27457973 27457954	20								VV-MIR070
vvi_miC440-3p	ACTGGAACAAAATAGAATTTCTATTAATAAATCAATTTTAAAAAACTTTAAAATATTATA AAATAAAAGCACAAATAAATAATAATCATACCATGTTTCCTTTCCAAAGTAGTTTTATGTTACTATTGCCCAATATGAGGGAAACAAGATTGTTCGCATGAAAGTTTGATGGTAGAGATTCTAAAGAATATCCATT	TTGATGGTAGAGATTCTAAAG	chr18: 27782770 27782790	21															grape-m3816
vvi_miC441-5p	GTTCAATATCTTCCATGATGGTAGGGCCTATTAGATTGATGATGTATTTGAGATGGTGTCTTCATACTGACAATTGATATGTTGTGTCTTGACTTGCTTGTGTTGTTAACTTATACGTTTTTTTGGACATTTGTTTTGTCCATCATTTTGGTTTGTCTTTATTAGCACAGTTTTTGTGATGTATGGTCCTATTTAAGCATTTGATGATTGAGGTTAGACTTTTCCATTGCATTATCATTGAGCATATCCTAGAGTTTCTCGTGTCTTGATGTTGTGTCTCTTATCGGTCGCCATCACATACTGGGGCATATCTCCTCTTAGGATTTATAGGATCCTCTACCGATATCCTAGGTACTGGGTT	TTCCATGATGGTAGGGCCTATT	chr18: 28601033 28601012	22														novel_mir_2
vvi_miC442-5p	CTTGCAGATCTCCTTCGGCGTCGGCAAATCCTTCCCTAAATTCGACCCACCCCACCCATTCCTCTCCCCAAATGACCCATTTCCTCCACCACCACCACCATTACCCCCTACACCAGGTCCGGCCGCCCGAATCACATTAACTCCAGGAGCAAATGGCGGCCCCGGCGGTGCATGCACTGCCAGCCCATTTCCCGACGGCGGAGGCGGCGGAGGTGGCCAATTCTCCGGCGGGT	TCCTTCGGCGTCGGCAAATCC	chr18: 29129199 29129219	21													Vvi-miRC38	novel_mir_67								Vvi-miRC38
vvi_miC443-3p	TTCTCAGAGAGAAATTTACAGAGCCAATTTGGCATCCTGGCCGCCTCCAAACGCTTGTGGGCGCCAATTCAGAAGAATTGGTATATATGGAGGTGGACAGAATGCCAAAATGGCTCTGTAATATTGCCTCTGAGAATC	AAATTGGCTCTGTAAATTTC	chr18: 3551273 3551254	20									va-miR097
vvi_miC444-3p	CCAAGTGGTTATTGACAAGTTACATACATCCAAGTTTGCAGATACGATACGGCCGCATCGTATCTGCAAACTTGGATGCATGTAGCTTGTCAATCACCACTTG	TGGATGCATGTAGCTTGTCAA	chr18: 4079282 4079302	21	vvi_miC444-5p	GACAAGTTACATACATCCAAG	chr18: 4079223 4079243	21	vvi_miC444-3p separated by a gap of 22 nucleotides from vvi_miC445-3p				va-miR027				Vvi-miRC37									Vvi-miRC37
vvi_miC445-3p	Predicted secondary structure available at doi: 10.1111/j.1364-3703.2012.00815.x	CCAGAACCAACTGCACATCAA	chr18: 4079324 4079344	21	vvi_miC445-5p	ATGTGCAGTTAGTTCCGGCAA	chr18: 4079181 4079201	21						s675359
vvi_miC446_V1-5p	ACCCCTTGGTATTTTCTTTGTTTTTCAATTTAATATCTATTTATTTGTCCTGAACACATTTCTCTATTTAGGGCAAATAAATAGATATTAAATTGAAAAACAGAGAAAAATACCAAGGGGT	AATTTAATATCTATTTATTTGTCC	chr18: 4234262 4234239	24	vvi_miC446_V1-3p	GCAAATAAATAGATATTAAATTGA	chr18: 4234216 4234193	24	Variants of vvi_miC446 in the same locus																		vvi-miRn041
vvi_miC446-5p	TCTCAATTTCTTTGATGACCCCTTGGTATTTTCTTTGTTTTTCAATTTAATATCTATTTATTTGTCCTGAACACATTTCTCTATTTAGGGCAAATAAATAGATATTAAATTGAAAAACAGAGAAAAATACCAAGGGGTATATATATGCATATGCGCCCTGCTTCACTAAAGCCAGTGCCTCACTTCACTAAAGCCTTCGTCTTGCGCTTTGCACT	ATTTAATATCTATTTATTTGTCCT	chr18: 4234261 4234238	24	vvi_miC446-3p	GGCAAATAAATAGATATTAAATTG	chr18: 4234217 4234194	24																	c73264
vvi_miC447-3p	AGAAGACTCATCTTGTGAGGTGGTGAGTTGTTTGTTTAGATAAATGAAAGGAAGGTTTAGGTATTTGAAGGCACTTATCTAAACAAACAACTCACCACC	ACTTATCTAAACGAACAACTCACC	chr18: 451467 451490	24	vvi_miC447-5p	TGAGTTGTTTGTTTAGATAAATGA	chr18: 451418 451441	24	In bold nucleotide that differ from the reference genome																c59197
vvi_miC448-3p	TGTGTGTGTATATGATATAATGGCACAGGTTACTAGAGGAAACAGAGGATGAGGTGAGTTTCAGTATCCTTCTTAACAATTTCTGGGATGGATTTATCTTGAATATGAATAATTTATATTTACTGGCGCTGATTCTTCTTGTAGTTAGCAGACT	TGGCGCTGATTCTTCTTGTAG	chr18: 714500 714480	21															grape-m3841
vvi_miC449-3p	GCTAATTTGAACCTTATCCTACCTCATGGGCAGTCTCATTTTAGGCTTGCACCTGGATTCAATAAATTGGGTAAATTGGAGCCTTGACTCTTAGGATGTCATGAGTTCGAATCTCAATGCATGTTTGCCCCCAATTTATTGAGCTCATGTGCAAGTCTAAAAAGAATGTTGCTTGTGAAGCTAGGTGTTACGACTTTAGC / TAGGCTTGCACCTGGATTCAATAAATTGGGTAAATTGGAGCCTTGACTCTTAGGATGTCATGAGTTCGAATCTCAATGCATGTTTGCCCCCAATTTATTGAGCTCATGTGCAAGTCTAAAAAGAATGTTGCTTGTGAAGCTAGGTGTTACGACTTTAGCCTAGATCAACTCGAT	ATTTATTGAGCTCATGTGCAAGTC	chr18: 7806269 7806292	24	vvi_miC449-5p	CTTGCACCTGGATTCAATAAATTG	chr18: 7806181 7806204	24																	c61218 / c74446		vvi-miRn077
vvi_miC450-3p	Predicted secondary structure available at doi: 10.1111/j.1364-3703.2012.00815.x	GTCTCTTGAGGATTGTAAAGGGTG	chr18_random: 3344600 3344577	24										s1129393
vvi_miC451-3p	GAGAGTTGCATGCAGCAAATGTTGGTGATTGTAGAGTAGTTTTGAGTAGGAATGGCGTCGCGGAGCCCTTGACGAACGATCATCGTCTTTGTAGGGAAGACGAACGATCTCGGATTGAGAATTCTGTGAGTATATCTTCTTCAATTTTGTCCATGAACCTAGTGCTTTTCCCTTTCCCCTACATTGGCTAAGTTCATTGTTGCAGGGTGGCTATG	TTGGCTAAGTTCATTGTTGCAG	chr18_random: 3407809 3407788	22															grape-m6520
vvi_miC452-5p	ACAATGAGTAATATTATTAGGGAATTAAGTAGAACTAGTTCTTCAAGATCTCTTAGGTCCCATGATAGTTCTGCATCTGCAT	ATATTATTAGGGAATTAAGTA	chr18_random: 3619381 3619401	21								VV-MIR024	va-miR082
vvi_miC453-3p	TAACCCCATCAAAAACCCCTCTAGCGTCCTCCAAAGAACCACAAGATGTGTACATGTGAACAAGTTTTGTTCGCAAAAATTCATTGTTTTCAAGCCCATTTATTCTAATATGCACATGAATTTGCTTACCATGTGTCAAAGACTTTGATTCAACACAGGCACGGAGAAGGGAGGAGAATGTAGTGGGGTTAACAGGGATAC	GAGGAGAATGTAGTGGGGTTA	chr18_random: 4558572 4558592	21													Vvi-miRC40									Vvi-miRC40
vvi_miC454-3p	TATTTTAATGATTAATTGAGCTGAAACATGTCTGCTTGAATAAACAAATAGGTTTGGGCTCCATTAATCATAAAAATAATTAATTGGTTCTGCAGTCCTTTCTATGCTGAATCTAGAATAGACTTCCCAACAAAATACATTTGGGCCTCTCAATCTCCTTTGAGAACAAATTTATTGGCCTTGCACTC	TTTGGGCTCCATTAATCATAA	chr18_random: 4634285 4634265	21	vvi_miC454-5p	ATGATTAATTGAGCTGAAACA	chr18_random: 4634330 4634310	21																c131134	c87896 / c85625
vvi_miC455	The authors do not report the precursor	TGGAAACATGTTGAAGCAGCT	chr19	21												miR055a / miR087
vvi_miC456-5p	GCCCAAACTATGATTTGGAATACTTTGGATGATAATGGGCCTAGTTGAGATTTTATATAATTCAAGGTAGATTTCTGCCCAAGTATATTCACCTTGCATTATATAAAATCTCAACTAGGCCAATTATCATCCAAAGTATGCCAAATCAGAATTTGGGC	TACTTTGGATGATAATGGGCCT	chr19: 10790715 10790735	21																miRC108
vvi_miC457-3p	TTTTTATGCGTTTTTTGTGTAATTTTTGGGTTTAGATTAAAGGATTGATGTTTAAGGATGGAAACCTAAGTGTTTTTGTCGGAAAATGCACAAAATTTTGGATGATTT	TCGGAAAATGCACAAAATTT	chr19: 11013539 11013558	20															grape-m4241
vvi_miC458a-5p	AAATGTGAGGAGGGTGTGAGAAATGTGAAGAGGGTATGAGAAATATAAGGGTACAAGAAATGAAAAAAAAAAAAAAAAATTCATACCCTCTTCACATTTCTTGTACTCTCCTCACATTC	AGGGTGTGAGAAATGTGAAGA	chr19: 11833179 11833199	21															grape-m4250
vvi_miC458b-5p	AAATGTGAGGAGGGTGTGAGAAATGTGAAGAGGGTATGAGAAATATAAGGGTACAAGAAATGAAAAAATAAATAAATTCTCGTACCCTCTTCACATTTCTTGTACTTTCCTTACATTC	AGGGTGTGAGAAATGTGAAGA	chr19: 15131222 15131242	21															grape-m4277
vvi_miC459-5p	ATAAGTACTTGGAGTGCGTTTAGTAGTGATTTTAAAAAGTACTTTTAGTATTTTTTTATATTTGAAAAATTTTATCGTTTAAGTATTAGAAATGTCAAAAATACTTTTTAGAATCACTATCAAATGCACTTTTAATATGTGCT	AAAGTGCATTTGATAGTGATTC	chr19: 13718045 13718066	22									va-miR100
vvi_miC460-3p	GGTCTCAATTTTGGGGTTCTTTGAGAATAAGATAATTTGTTTAATGACAATTTCTATACCCAGTAACATTCTTATTTGTTTTTTGATGTTCGTTCATGTCTTTGTACAGAGAAAGGTTGAAGATGTGGAAGAAAATCTCAAACCTTTTTCCATCTGCTGTCTGAGAATTGCTTCAAGGAT AAGGGGCA	TGTCTGAGAATTGCTTCAAGG	chr19: 13951214 13951234	21															grape-m4269
vvi_miC461a-3p	TCAGTAATGTTCTGGTTTGATTTTTGATGTTCTTCCACTTCTTTGTACAGGGAAAGCTAGATGGTTTGAAACGTAAATGCATGTGATCAGAATTAAAAAGATTATTAAAAAAGAAAAGAAAAAACAAGAAGAGTAAAGATTGTTCTTCTTATAGGTTAATGGACGTGAAGATCATCAAGT TGGAAATTTGCGAT	CGTGAAGATCATCAAGTTGGA	chr19: 4078969 4078989	21															grape-m4178
vvi_miC461b-3p	ATATATAGTTTTTGATTTTTGATGTTCTTCCACTTCTTTGTACAGGGAAAGCTAGATGGTTTGAAACGTAAATGCGTGTGATCAGAATTAAAAGATAATTAAAAAAGAAAAGGAAAAACAAGAAGAGTAAAGATTGTTCTTCTTATAGGTTAATGGACGTGAAGATCATCAAGTTGGAAA TTTGCGAT	CGTGAAGATCATCAAGTTGGA	chr19: 4080545 4080565	21															grape-m4179
vvi_miC461c-3p	TTCTCAGTAATGTTCTTGTTTGATTTTTGATGTTCTTCCACTTCTTTGTACAGGGAAAGCTAGATGGTTTGAAACGTAAATGCATGTGATCAGAATTAAAAAGATTATTAAAAAAGAAAAGAAAAAACAAGAAGAGTAAAGATTGTTCTTCTTATAGGTTAATGGACGTGAAGATCATCA AGTTGGAAATTTGAGAT	CGTGAAGATCATCAAGTTGGA	chr19: 4105118 4105138	21															grape-m4180
vvi_miC461d-5p	GGTTAATGGACGTGAAGATCATCAAGTTGGAAATTTGCGATTCACCCGGTTTTCAATGGCCATATATTCATCTGAAACCGTGTTGCAATGTTCGTTGACAGCTTGATCTTTCTGTGTCAGTGACG	CGTGAAGATCATCAAGTTGGA	chr19: 14726616 14726596	21															grape-m4520
vvi_miC461e-3p	AATTGCTGTTCTCAGTAATGTTCTTATTTGATTTTGATGTTCTTCCACTTCTTTGTACAGGGAAAGCTAGATGGTTTGAAACGTAAATGCATGTGATCAGAATTAAAAAGATTATTAAAAAAGGAAAGAAAAAACAAGAAGAGTAAAGATTGTTCTTCTTATAGGTTAATGGACGTGAAGATCATCAAGTTGGAAATTTGCGAT	CGTGAAGATCATCAAGTTGGA	chrUn: 33339035 33339015	21															grape-m5747
vvi_miC462-5p	TACCGAGAGACATGTCACTCGTCAAGCCAAGCATGTAAAGGCCAGGATGAAGGCTCATTTTGATCGTCCAACCACTAAGAGGACTGAAGCCATGCATGTAAAGGCTAGGACGAAGGCCCATTTTGATCGCTT	CATGTCACTCGTCAAGCCAAG	chr19: 15466592 15466612	21															grape-m4281
vvi_miC463-3p	ATCAGTAACATGAACGGCTCACACATATAATGGTTAGAAACAATCCTAGGCCTGCAGGCAAGCATATTACATTTGCAGTACTAAATTCATAACTGAAA	ATTATATGTGTGAGCCGTTCA	chr19: 18688055 18688075	21									va-miR080
vvi_miC464-5p	CTTAACCTCATGGGCTTGTGGAGAAGAAAGTGAAAACCTCATGTGCCCAAGAAGCCCAGGCTTAATTGAGTGAGATTTCAGGTGGCTCAGCCCAGTAAACCTTAACGCATGTCATCTCTTCTCCTGTGTATGTCTAGGATTCC	TGGGCTTGTGGAGAAGAAAGTGA	chr19: 22103308 22103286	23												miR069	Vvi-miRC51									Vvi-miRC51
vvi_miC465-5p	TTTGGTACAATAGAGAATTTCGGTCATAACACTTTCTTAATTGTAAATCTCTTTTGTAATTAGAAT	TTTGGTACAATAGAGAATTTCGGT	chr19: 22825514 22825537	24	vvi_miC465-3p	TGTAAATCTCTTTTGTAATTAGAAT	chr19: 22825555 22825579	25														vvi-New93
vvi_miC466-3p	TGTCCGCCCGTCTACCCGGTCGGACCGCTACTAGATCAGATCGAAGCGGACCGGTCCGGCGAAGATCGCATCAT	AGCGGACCGGTCCGGCGAAG	chr19: 23202134 23202153	20															grape-m4363
vvi_miC467_V1-3p	Predicted secondary structure available at doi: 10.1111/j.1364-3703.2012.00815.x	TTGACAGTGATTTTAGGAAGTGTT	chr19: 2845214 2845237	24					Variant of vvi_miC467-3p in the same locus					s1497218
vvi_miC467-3p	TAATAGAAAACAATTGCGTTTGATAGTGATTTTAGGAAGTGTTTTTAACATTTTTAATACTTGAAGGATAAAAATTTTCAAATGTTACAGATGTTAGAAACACTTGTTAGAATCACTGTCAAGCACACTTTAAGAATGCATTTGACAGTGATTTTAGGAAGTGTTTCTACTCTTTTTAACACTTAAATTTTTATTATCTTTTAACCATAAAAAAAATGTTAGAAACACTTCCTACAATCAGTGTCAAATACACTTTAAAAATGTTTTCTAAAATTATTGTCAAAAGTACTAAAAAAGATA	ACAGTGATTTTAGGAAGTGTTTCT	chr19: 2845217 2845240	24	vvi_miC467-5p	AAACACTTGTTAGAATTACTGTCA	chr19: 2845170 2845193	24	In bold nucleotide that differ from the reference genome																c69998
vvi_miC468a-3p	ATTGTTCTTCTTATAGGTTAATGGACGTGAAGATCATCAAGTTGGAAATTTGCGATTCACCCGGTTTTCAATGGCCATATATTCATCCGAAACCGTGTTGCAATGTTCGTTGACAGCTTGATCTTTCTTTGACAGTGACGATTGCAA	CTTGATCTTTCTTTGACAGTG	chr19: 3974811 3974831	21															grape-m0640
vvi_miC468b-3p	ATTGTTCTTCTTATAGGTTAATGGACGTGAAGATCATCAAGTTGGAAATTTGCGATTCACCCGGTTTTCAATGGCCATATATTCATCCGAAACCGTGTTGCAATGTTCGTTGACAGCTTGATCTTTCTTTGACAGTGACGATTGCAA	CTTGATCTTTCTTTGACAGTG	chr19: 4034891 4034911	21															grape-m0641
vvi_miC468c-3p	ATTGTTCTTCTTATAGGTTAATGGACGTGAAGATCATCAAGTTGGAAATTTGCGATTCACCCGGTTTTCAATGGCCATATATTCATCCGAAACCGTGTTGCAATGTTCGTTGACAGCTTGATCTTTCTTTGACAGTGACGATTGCAA	CTTGATCTTTCTTTGACAGTG	chr19: 4079060 4079080	21															grape-m0642
vvi_miC469-5p	GCATCCTTAACAGGACTGGCAGTGATGGTTATCATGGTGGTTGTGATGAAACGTTAATTTGTCGAATTTACGAACCCTATCCTATATGTGTATTTGGTTTATTAGGATGCCAATATGAATAATTAGGTCCATATCTTATATACATCGCAGTAATGAATTAGTAGTCAAAAGACTCTTTTGACTAAGTTTTTATGTACAGCGGATTTGAAGTCTGTTGGTGTTGGGCTAATATTTATGCCATCAGCTGTCCTCTGTTCCATTTGCT	CAGGACTGGCAGTGATGGTTA	chr19: 5046241 5046261	21												miR011	Vvi-miRC76									Vvi-miRC76
vvi_miC470-5p	TATCCTCTGATTGGTTACCGAGAAAACGCAGGAAAATAAAAGAGGCAGGCTTATTTATTATTATTATTTTTTTCTTTCTTGAAGCTTCGGTTTTTCACTGTTTGTTGTCTTAGAAAATAAACCTCCATGTATAGTGGAGCTGAGATTCAACTTTCGGAAGCTGAAACAACAGATTTTGTA GGATGCCAAAATTTCATTCTGTTTTCTTTTTCTTACGCTTTCTTAGCAACCAAACAGAGG TCG	TTGGTTACCGAGAAAACGCAG	chr19: 5056204 5056224	21															vvi-miRC3629f
vvi_miC471-3p	TTTCCCTCAAGTTTGGAGCAACAGGATATGACTTTGAGGTCTGCCCTGAACTGTAAATGAACATATCACTCAAATCGGGACAGTATCGTAAGCAAATTGTTTCCAGCTTTTCCAAGGGTTGAGTAAAATCATCACAAGAGAGAAGATATTTTAGTTTCGAACAACAGAGCACCGTCATTACTTTTAGCCTTGAAAATTTGAGTCCAAGACTCCCAACTAATTCTGAAATGCTCTCTAGGCTAAGGAGATCCACGAGGTTAAGTTCCTCTAGATTTGGAAGTAGGTCATTTGGGGAAC	TCTAGATTTGGAAGTAGGTCA	chr19: 5446795 5446775	21													Vvi-miRC48									Vvi-miRC48
vvi_miC472-3p	TGCAACTCACGAATATTTGATTCTTTTGAAATAGTCACCCAATATACATGGCTGAAAAGGCTATTATTTTCCAAGAGGCGATTGTAAATATGGGTAACGACAGTTGT	GGCGATTGTAAATATGGGTAA	chr19: 580988 580968	21													Vvi-miRC47									Vvi-miRC47
vvi_miC473_V1-5p	The authors do not report the precursor	TTTGATCAGATATTGGATTGC	chr19: 607169 607189	21	vvi_miC473_V1-3p	AAGCAGAGTTTGATAGAGGG	chr19: 607222 607241	20	Variants of vvi_miC473-5p and vvi_miC473-3p in the same locus							miR101
vvi_miC473-5p	AGAAGGGCGTCTTTGATCAGATATTGGATTGCTGAGGGGATGGTAGGAGAAATGGAAACAAGGCAAGCAGAGTTTGATAGAGGGCATGCTATACTG	CTTTGATCAGATATTGGATTG	chr19: 607168 607188	21	vvi_miC473-3p	AGCAGAGTTTGATAGAGGGC	chr19: 607223 607242	20									Vvi-miRC41									Vvi-miRC41
vvi_miC474a-3p	Predicted secondary structure available at doi: 10.1111/j.1364-3703.2012.00815.x	CAAAGCGGACAATATCTACAT	chr19: 7099026 7099006	21										s501879_1
vvi_miC474b-3p	The authors do not report the precursor	CAAAGCGGACAATATCTACAT		21										s501879_2
vvi_miC474c-3p	The authors do not report the precursor	CAAAGCGGACAATATCTACAT		21										s501879_3
vvi_miC475_V1-3p	TTTTAATGAATGCCATTCTCTTTGTTGAAATGAGTTGTCAGAGTTAGACCTTGAGTTAGTGCTTTTGAATGCTCCTTTTTGTGTAGCATTTTGGAAGTACTTTTCTTGCTTTTGAAAGCTAAAATCAATGTAATTTTTGCTTCCAAAAGTAGGAAAAGTACTTGCAAAGTGCTGTCAAAATAAGGTCACTGTAATTTCATTCCACGCTGGGCTATATTATTCTGACAAATTCCTCATCAATATGACCTTGCTTGCTTGAAA	AAGTACTTTTCTTGCTTTTGAAAG	chr19: 7113020 7113043	24	vvi_miC475_V1-5p	TCCAAAAGTAGGAAAAGTACTTGC	chr19: 7113067 7113090	24	Variants of vvi_miC475-5p and vvi_miC475-3p in the same locus					s49410													vvi-miRn038
vvi_miC475-3p	TGAAATGAGTTGTCAGAGTTAGACCTTGAGTTAGTGCTTTTGAATGCTCCTTTTTGTGTA GCATTTTGGAAGTACTTTTCTTGCTTTTGAAAGCTAAAATCAATGTAATTTTTGCTTCCAAAAGTAGGAAAAGTACTTGCAAAGTGCT	AGTACTTTTCTTGCTTTTGAAAGC	chr19: 7113021 7113044	24	vvi_miC475-5p	TTCCAAAAGTAGGAAAAGTACTTG	chr19: 7113066 7113089	24							VITIS-MIR29*									c135673	c71518 / c87160 / c91132 / c88821
vvi_miC476-3p	ACAAGCTGGAAGTATTCAAGGGAGGGAGTCCGCTGGTGGTCAACCAACCTGACGATGAAGCCGAGGTGGGTCGAGCCCTAGCCAACAGTTGCAGGAGTGTGGCTGGGGTCCTAATCGATGCCCACATAGGGGAGGAGCTAAGCAAGGAGCTGTTTTTAAGGGTTGAGCACAAGGGGACAAGCCATGCAAAA	GGTTGAGCACAAGGGGACAAG	chr19: 7308978 7308958	21															grape-m4455
vvi_miC477-3p	TTTTAAGTTTGGTGTCTGGGTTTGTGAGTGGTTCATCTGAGAGCTCTCATTTCTGAGGTTTTAGGCTTCTGGATTTTGAGAATTTGCCTGTGTTCACTTCAAGCTTGGACTAGGGTTTTGGAT	TTCACTTCAAGCTTGGACTAG	chr19: 7695313 7695333	21															grape-m4207
vvi_miC478_V1-5p	Predicted secondary structure available at doi: 10.1111/j.1364-3703.2012.00815.x	ATGACATGAGTTGGAACTAAAAGA	chr19: 8929036 8929059	24					Variant of vvi_miC478-5p in the same locus					s450244
vvi_miC478-5p	CATCAGGCTAAATGACATGAGTTGGAACTAAAAGAACTAAAAGACCCATAGATTCCAGTTTCTTTGTTTTTTGTTCTTTTAGTTCCAATTCATGTCATTTAGCCTGATGA	AATGACATGAGTTGGAACTAA	chr19: 8929035 8929055	21													Vvi-miRC42									Vvi-miRC42
vvi_miC479-3p	TTTATTTTTCTTCATTGTTTCTTTCCTTCTATTTTTCCTCTCTATTTTCTTTCATTTGCATCTTCACTTAAAATTTTCAGTTCTCGGAAAATTTGAGAGAAAATGTGAGGGAAATAAAATTGAGAGGAAAAGTAATAGGAAAGAAAAAGTGAAGGAGAATAAAAA	AAAAGTGAAGGAGAATAAAAA	chr19: 9521291 9521271	21	vvi_miC479-5p	TTTATTTTTCTTCATTGTTTC	chr19: 9521435 9521415	21														vvi-New2
vvi_miC480-5p	TTTTTTTCGTTTGGTGTTAATTCTCCATTTTGAAGCCCAATTGATGTTGGAGATTTGTAGAAAACACTGTTTGGAGCAAAAC	TTTTTTTCGTTTGGTGTTAAT	chrUn: 13872068 13872048	21	vvi_miC480-3p	AAACACTGTTTGGAGCAAAAC	chrUn: 13872007 13871987	21														vvi-New94
vvi_miC481a-5p	Predicted secondary structure available at doi: 10.1111/j.1365-313X.2010.04208.x	GAGATAAGAAGGCGATGGTAT	chrUn: 15816138 15816158	21							miRC29					miR098a
vvi_miC481b-5p	TTAAGGAGAATAGCATATAAATATTAATAATTTGCTTGACAGAGATAAGAAGGCGATGGTATCTGCTATCAATAGACTGCTAGAGATTGTTGATAACAAATACTGTCGCCTTCGTATCTCTATCAGTCAAAGTATTAATATTAGGTTATTGTGTTTAA	GAGATAAGAAGGCGATGGTAT	chrUn: 32134298 32134318	21	vvi_miC481b-3p	ACTGTCGCCTTCGTATCTCTA	chrUn: 32134358 32134378	21								miR098b											vvi-miRn080
vvi_miC482-5p	GCCTAAAATTTTGAGAGCTAAAGGAAGGCCTTGAGCATAAGTAGTTACTCTTCTTGAGAGCTCCATACAATCATAATATGGAAGTTGATGTTTTGAGGAATAATGGCAAAGGACCTTCATGGCTTCATCATCATTTAATTT	TTGAGAGCTAAAGGAAGGCCT	chrUn: 16227514 16227534	21															grape-m5176
vvi_miC483-3p	ACCTTCTATAATTTCATAAATTTTAATTTATACTACAAGTGTTTCTTAAATTTGATTTTATATAGAAGATGTCTTTTGAAGAAATACCTTTAATATATATTAGATTTTGTGGAATTGTAGAAGGTGT	ATTTTGTGGAATTGTAGAAGGTGT	chrUn: 22209471 22209448	24	vvi_miC483-5p	ACCTTCTATAATTTCATAAATTTT	chrUn: 22209574 22209551	24														vvi-New45
vvi_miC484-3p	GCTGTGTTTTTTTCTATTTCTGGTTTCTATTCCTCATGTATAAGGAATTGAAACCAGAAATAGAACAAAACACAGCAA	AAATAGAACAAAACACAGCAA	chrUn: 24133605 24133585	21	vvi_miC484-5p	GCTGTGTTTTTTTCTATTTCT	chrUn: 24133662 24133641	23					va-miR099-1 / va-miR099-2			miR032						vvi-New3
vvi_miC485-5p	AAGTAAGACATTCGATTTAGCATTAGTTATACAATGCTATTAAACATTGCACTTCTTTTCTTTTGCTTCTTATTACTTTTTGTTAGGCAACAGGAATGGAGCGCAACTAACAATAGCATTCTACATGTGGTGCTAAATGAAATGTCTTACTTCC	AAGTAAGACATTCGATTTAGCATT	chrUn: 25321801 25321778	24	vvi_miC485-3p	TGCTAAATGAAATGTCTTACTTCC	chrUn: 25321671 25321648	24														vvi-New8					vvi-miRn016a
vvi_miC485b-5p	ATAAGGAAGTAAGACATTTGATTTAGCATTAGTTATACAATGCTATTAAACATTGCACTTCTTTTCTTTTGCTTCTTATTACTTTTTGTTAGGCAACGGGAATGAAGCGCAACTAACAATAGCATTCTACATGTGGTGCTAAATGAAATGTCTTACTTCCTTGT	AAGTAAGACATTTGATTTAGCATT	chrUn: 25297062 25297039	24	vvi_miC485b-3p	TGCTAAATGAAATGTCTTACTTCC	chrUn: 25296932 25296909	24																			vvi-miRn016b
vvi_miC486-3p	CCCTTATCTCCTCCATCCGATCCCTATCTTTTATGCCGATCTCAAATCGATTGATAGATAGCCTGATCTGTTCGATAACCTAACCCTCGTTCGATAGAGCTAACCCCCTTGATATGAAAG TTTTCCAACCCACCCGAAAGGTGTCTGAGGCAGCAAGATAGGGCTCAGCCAAAAAGCTTACTAGCGCAGGGGC	TAAAAGATAGGGATCGGATGGAG	chrUn: 27394600 27394578	23									va-miR105
vvi_miC487-3p	The authors do not report the precursor	GTGAGTTCCTTTCAACTATGTAGA	chrUn: 31698029 31698006	24	vvi_miC487-5p	TCTACATGATTAGGAGTGGGTTGT	chrUn: 31697959 31697936	24							VITIS-MIR31
vvi_miC488-3p	TCCTATCTATAGAAAGTAATTCTCATTTTGATTTTTATAGGGAGAATTATGTTTTGGGGTAGATGG	AGAATTATGTTTTGGGGTAGATGG	chrUn: 37504778 37504755	24	vvi_miC488-5p	TCCTATCTATAGAAAGTAATTCTCA	chrUn: 37504820 375048796	25														vvi-New22
vvi_miC489-3p	GAACTAGACCAATCATTGAATGAAAAAAAGTTATTAATTCACATTCACTGGTTGGATTGGTGGTTG	ATTCACTGGTTGGATTGGTGGTTG	chrUn: 38094943 38094920	24	vvi_miC489-5p	GAACTAGACCAATCATTGAATGA	chrUn: 38094985 38094963	23														vvi-New41
vvi_miC490-3p	GTTTGGCAGTGATTCTAGGAAACGTTTCTACTCTTTTTAACACTTGAATACAAATTTTCAAGTGTTAGAAAGGTTAGAAACATTTCCTAGAATCACTATGAAAC	TAGGAAACGTTTCTACTCTTT	chrUn: 38281394 38281374	21	vvi_miC490-5p	AGGTTAGAAACATTTCCTAGA	chrUn: 38281339 38281319	21				VV-MIR051	va-miR054														vvi-miRn020a
vvi_miC490b-3p	CGTTTCATAGTGATTCTAGGAAATGTTTCTAACCTTTCTAACACTTGAAAATTTGTATTCAAGTGTTAAAAAGAGTAGAAACGTTTCCTAGAATCACTGCCAAACA	TAGGAAACGTTTCTACTCTTT	chrUn: 38284821 38284801	21	vvi_miC490b-5p	AGGTTAGAAACATTTCCTAGA	chrUn: 38284766 38284746	21																			vvi-miRn020b
vvi_miC491-5p	ATTATTTCAAAGATTTAAGAATTAGTTGTTAACCTTTATACAAGACTTAGGAAGAATGCACCTGCATGGACACAAATGATTTAAGAATCATTCCATGCAAGTGCATTTTTCCTAAGTCTTTTGTATAAGAGTTCACAAATGATTCTTAAGTCTTTGAAATAAT	GACTTAGGAAGAATGCACCTGCA	chrUn: 42515664 42515686	23																			n_191
vvi_miC492-5p	Predicted secondary structure available at doi: 10.1111/j.1365-313X.2009.03906.x	TAATGCCAAGACAAATGCTAG	chrUn: 4878066 4878086	21						id1
vvi_miC493-5p	GTAGATATTGTCTGCTTTGGGCCTAAGGATCAGATAACTTTAAAACACATCTATACAAGTAACAAGAGTCTACTAAAATATAGGGTCTCAAAAAACTTATCTTCCTAGTTGATGTAGGATCTCACGATAAATTTTGACACTTTATATGTAGTAGGCTCTTTTTAACTACATGGATATGTTTAAAGCTTTGCATATCTTGGACCCAAAGTGGATAGTATCTATAC	GTAGATATTGTCTGCTTTGGGCCT	chrUn: 7206279 7206256	24	vvi_miC493-3p	ACCCAAAGTGGATAGTATCTATAC	chrUn: 7206079 7206056	24														vvi-New62			c127798 / c157238
vvi_miC493-5p	The authors do not report the precursor	GTAGATATTGTCTGCTTTGGGCCT	chrUn: 7206279 7206256	24	vvi_miC493_V1-3p	CTTGGACCCAAAGTGGATAGTATC	chrUn: 7206084 7206061	24	Variant of vvi_miC493-3p in the same locus						VITIS-MIR20
vvi_miC494-3p	GAAAGATATGCTGTATTTGGTGGAGTGGATGAGAAAGGGAATAGTGCATTGCATCTTGCTGCAATGTTTTCAGTTTATCATCTTTGCTCACTCTTTGTGCTGCATATGGGAA	CTGTATTTGGTGGAGTGGATG	chrUn: 7244911 7244931	21														novel_mir_38
vvi_miC495-5p	GTTGATAGTGGAAGTTTGAACTGGACTAGGGCCCATGGTTTTTCCCTTCGCATTGAGGGGTTTTCCATGTAAATATTCTGGTCTCTGATTTATTTTTCCGTTGCATGAGTTTA	GTGGAAGTTTGAACTGGACTAGG	chrUn: 9931827 9931849	23								VV-MIR044
vvi_miC496	The authors do not report the precursor	TGGCCAAAGCTTCATAATCTG	chrUn	21												miR044
vvi_miC497b	The authors do not report the precursor	TCAGAACAACTGAGAGGGTTA	chrUn	21												miR099
vvi_miC498a	The authors do not report the precursor	TAACTAAAGATTGTTGGATGACA		23												miR008a
vvi_miC498b	The authors do not report the precursor	TAACTAAAGATTGTTGGATGACA		23												miR008b
vvi_miC499	The authors do not report the precursor	TACCTTTGAGTGCGGTTTGAAC		22												miR017
vvi_miC500	The authors do not report the precursor	TCCAAGGATGGAAAAGGCTTC		21												miR035
vvi_miC501a	The authors do not report the precursor	TTATGAAGATCTAGGGTTAAG		21												miR063a
vvi_miC501b	The authors do not report the precursor	TTATGAAGATCTAGGGTTAAG		21												miR063b
vvi_miC502	The authors do not report the precursor	TGACATTGAAAATGATGGTGA		21												miR083
vvi_miC503	The authors do not report the precursor	TTGGACTTCATGTTGGAGACT		21												miR092
vvi_miC504	The authors do not report the precursor	GCTCCGCGAAGAAGACTCCAT		21												miR097
vvi_miC505_V1-5p	AATTTTTATTTTCCTATATTTTTTCTTTCCTTCCATGTTTCCTTTCTATTTTGTTTTCCTCACATTTTCTCTCAATTTTTTTAGGAACCAGACATGGCCCTAGACTATGTTTGGTTTCAAAAAATTTGAGGGAAAGAAAATGAAGAATAAAAATATAAGAAAAGAAAAAAGTAAGGAAAATTTATAAAAAAATT	TCTCAATTTTTTTAGGAACCAGAC	chr13: 2201512 2201489	24	vvi_miC505_V1-3p	TTGGTTTCAAAAAATTTGAGGGA	chr13: 2201471 2201449	23	Variants of vvi_miC505 in the same locus																		vvi-miRn004.2
vvi_miC505-5p	AATTTTTATTTTCCTATATTTTTTCTTTCCTTCCATGTTTCCTTTCTATTTTGTTTTCCTCACATTTTCTCTCAATTTTTTTAGGAACCAGACATGGCCCTAGACTATGTTTGGTTTCAAAAAATTTGAGGGAAAGAAAATGAAGAATAAAAATATAAGAAAAGAAAAAAGTAAGGAAAATTTATAAAAAAATT	TCTCAATTTTTTTAGGAACCAGACA	chr13: 2201512 2201488	25	vvi_miC505-3p	TTTGGTTTCAAAAAATTTGAGGGA	chr13: 2201472 2201449	24																			vvi-miRn004.1
vvi_miC506_V1-5p	GTATGGGGTCAACCTTACTTGCAGTTAAAAAGTGTAATTAAATTATTGTTTTGTTTTGTCCATCTAAACAATCGTTTAATTACCCTTTTTAACTGTAAGTAAGGTTGGCTCCTTA	CAGTTAAAAAGTGTAATTAAA	chr13: 2538175 2538155	21	vvi_miC506_V1-3p	CCCTTTTTAACTGTAAGTAAG	chr13: 2538114 2538094	21	Variants of vvi_miC506 in the same locus																		vvi-miRn005.2
vvi_miC506-5p	GTATGGGGTCAACCTTACTTGCAGTTAAAAAGTGTAATTAAATTATTGTTTTGTTTTGTCCATCTAAACAATCGTTTAATTACCCTTTTTAACTGTAAGTAAGGTTGGCTCCTTA	TACTTGCAGTTAAAAAGTGTA	chr13: 2538181 2538161	21	vvi_miC506-3p	TAATTACCCTTTTTAACTGTA	chr13: 2538120 2538100	21																			vvi-miRn005.1
vvi_miC507_V1-5p	ATTTCGAACTGAGCTTGACAAGTCCTAGATTGGTTTGTCTCGACCCATCTAACACTGGTC AAGCTCAGTTCGGAAT	TCGAACTGAGCTTGACAAGT	chr4: 17137167 17137186	20	vvi_miC507_V1-3p	TGGTCAAGCTCAGTTCGGAA	chr4: 17137219 17137238	20	Variants of vvi_miC507 in the same locus																		vvi-miRn009.2
vvi_miC507-5p	ATTTCGAACTGAGCTTGACAAGTCCTAGATTGGTTTGTCTCGACCCATCTAACACTGGTC AAGCTCAGTTCGGAAT	TTCGAACTGAGCTTGACAAGT	chr4: 17137166 17137186	21	vvi_miC507-3p	TGGTCAAGCTCAGTTCGGAAT	chr4: 17137219 17137239	21																			vvi-miRn009.1
vvi_miC508_V1-5p	CTTTTTCAAGGTATAAATAAATTATATTGAGAAATGTGAGATCACGTTTGAGAGTTTTATCTAAACATCCTTAAAAGTTGTATAAAAAATGTTTTTAAGTATTTAAAATAGTTTATACTTTTTAAATACTAAAAGCATCATTTAAAATTTAAATACAACTTTTAAAGATGTTTAGATAGAACTTTCAAAATGTAGTTTCATTTTTTCTAAAAGTAATTTAGTTCATTTTTTAAAAAG	TATCTAAACATCCTTAAAAGTTGT	chr7: 15873554 15873531	24	vvi_miC508_V1-3p	TTTTAAAGATGTTTAGATAGAACT	chr7: 15873452 15873429	24	Variants of vvi_miC508 in the same locus																		vvi-miRn013.2
vvi_miC508-5p	CTTTTTCAAGGTATAAATAAATTATATTGAGAAATGTGAGATCACGTTTGAGAGTTTTATCTAAACATCCTTAAAAGTTGTATAAAAAATGTTTTTAAGTATTTAAAATAGTTTATACTTTTTAAATACTAAAAGCATCATTTAAAATTTAAATACAACTTTTAAAGATGTTTAGATAGAACTTTCAAAATGTAGTTTCATTTTTTCTAAAAGTAATTTAGTTCATTTTTTAAAAAG	TTTTATCTAAACATCCTTAAAAGT	chr7: 15873557 15873534	24	vvi_miC508-3p	AACTTTTAAAGATGTTTAGATAGA	chr7: 15873455 15873432	24																			vvi-miRn013.1
vvi_miC509a-5p	TTACTTTGAGGCCATTGCATTAATGGATGAAGCCACTAAGGTACGCACCGCGACCCTTTACCTCACTGATAATGCTACTCTATGGTGGCGTCGACGGTTTGC	CTTTGAGGCCATTGCATTAATG	chr14: 25830685 25830664	22	vvi_miC509a-3p	ACTCTATGGTGGCGTCGACGG	chr14: 25830612 25830592	21																			vvi-miRn017a
vvi_miC509b-5p	TTACTTTGAGGCCATTGCATTAATGGATGAAGCCACTAAGGTACGCACCGCGACCCTTTACCTCACTGATAATGCTACTCTATGGTGGCGTCGACGGTTTGC	CTTTGAGGCCATTGCATTAATG	chr13: 13673511 13673532	22	vvi_miC509b-3p	ACTCTATGGTGGCGTCGACGG	chr13: 13673584 13673604	21																			vvi-miRn017b
vvi_miC510a-5p	CCACTTTGTCCATGGTCTGATCGAGCTGAAATTTGGAGGAGAGGTTCACAACTCATTAATCTTCAATTTGAACGGTGAAGATCGGATTTAGAGTTTTGGAA	CTTTGTCCATGGTCTGATCGAGCT	chr3: 18483666 18483643	24	vvi_miC510a-3p	TGAAGATCGGATTTAGAGTTT	chr3: 18483594 18483574	21																			vvi-miRn018a
vvi_miC510b-5p	CAGCTTTGTCCATGGTCTGATCGAGCTGAAATTTGAAGGAGAGGTTCACAGCTCATTAAT CTTCAATTTGAACGGTGAAGATCGGATTTAGAGTTTTGGAA	CTTTGTCCATGGTCTGATCGAGCT	chr5: 23922521 23922544	24	vvi_miC510b-3p	TGAAGATCGGATTTAGAGTTT	chr5: 23922593 23922613	21																			vvi-miRn018b
vvi_miC510c-5p	CCACTTTGTCCATGGTCTGATCGAGCTGAAATTTGGAGGAGAGGTTCACAACTCATTAATCTTCAATTTTAACGGTGAAGATCGGATTTAGAGTTTTGAAA	CTTTGTCCATGGTCTGATCGAGCT	chr18: 22737068 22737045	24	vvi_miC510c-3p	TGAAGATCGGATTTAGAGTTT	chr18: 22736996 22736976	21																			vvi-miRn018c
vvi_miC510d-5p	CCACTTTGTCCATGGTCTGATCGAGCTAAAATTTGGAGGAGAGGTTCACAACTCATTAATCTTCAATTTGTACGGTGAAGATCGGATTTAGAGTTTTGAAA	CTTTGTCCATGGTCTGATCGAGCT	chr18: 27484347 27484324	24	vvi_miC510d-3p	TGAAGATCGGATTTAGAGTTT	chr18: 27484275 27484255	21																			vvi-miRn018d
vvi_miC510e-5p	TCGCTTTGTCCATGGTCTGATCGAGCTGAAATTTGGAGGAGAGATTCACAACTCATTAATCTTTAATTTGAACGGTGAAGATCGGATTTAGAGTTTTGTAA	CTTTGTCCATGGTCTGATCGAGCT	chr4: 8287713 8287736	24	vvi_miC510e-3p	TGAAGATCGGATTTAGAGTTT	chr4: 8287785 8287805	21																			vvi-miRn018e
vvi_miC511a-5p	GGCTTGGATCATCCTTGTCTTCGTGATATGGTTTCAAGTAACTCACGTGGAAGACAGGGTGAATCTTTAACCT	GGATCATCCTTGTCTTCGTGA	chr14: 5895243 5895223	21	vvi_miC511a-3p	CGTGGAAGACAGGGTGAATCTT	chr14: 5895203 5895182	22																			vvi-miRn019a
vvi_miC511b-5p	GGCTTGGATCATCCTTGTCTTCGTGATATGGTTTCAAGTAACTCACGTGGAAGACAGGGTGAATCTTTAACCT	GGATCATCCTTGTCTTCGTGA	chr14: 25826831 25826851	21	vvi_miC511b-3p	CGTGGAAGACAGGGTGAATCTT	chr14: 25826871 25826892	22																			vvi-miRn019b
vvi_miC511c-5p	GGCTTGGATCATCCTTGTCTTCGTGATATGGTTTCAAGTAACTCACGTGGAAGACAGGGTGAATCTTTAACCT	GGATCATCCTTGTCTTCGTGA	chr8: 11003484 11003504	21	vvi_miC511c-3p	CGTGGAAGACAGGGTGAATCTT	chr8: 11003524 11003545	22																			vvi-miRn019c
vvi_miC511d-5p	GGCTTGGATCATCCTTGTCTTCGTGATATGGTTTCAAGTAACTCACGTGGAAGACAGGGTGAATCTTTAACCT	GGATCATCCTTGTCTTCGTGA	chr2: 5735701 5735721	21	vvi_miC511d-3p	CGTGGAAGACAGGGTGAATCTT	chr2: 5735741 5735762	22																			vvi-miRn019d
vvi_miC511e-5p	GGCTTGGATCATCCTTGTCTTCGTGATATGGTTTCAAGTAACTCACGTGGAAGACAGGGTGAATCTTTAACCT	GGATCATCCTTGTCTTCGTGA	chr10: 11991357 11991337	21	vvi_miC511e-3p	CGTGGAAGACAGGGTGAATCTT	chr10: 11991317 11991296	22																			vvi-miRn019e
vvi_miC511f-5p	GGCTTGGATCATCCTTGTCTTCGTGATATGGTTTCAAGTAACTCACGTGGAAGACAGGGTGAATCTTTAACCT	GGATCATCCTTGTCTTCGTGA	chr7: 13963900 13963880	21	vvi_miC511f-3p	CGTGGAAGACAGGGTGAATCTT	chr7: 13963860 13963839	22																			vvi-miRn019f
vvi_miC511g-5p	GGCTTGGATCATCCTTGTCTTCGTGATATGGTTTCAAGTAACTCACGTGGAAGACAGGGT GAATCTTTAACCT	GGATCATCCTTGTCTTCGTGA	chr12: 16685521 16685541	21	vvi_miC511g-3p	CGTGGAAGACAGGGTGAATCTT	chr12: 16685561 16685582	22																			vvi-miRn019g
vvi_miC512a-5p	AGGGCTTCCCATGGCATGAACCAAGGTAACCGGATGAATTTTTGCTATTAAATGCATGCTTAAATGTTAACATGTGATCCTATGCTATTTCAATTTTCTTCAATTGGAATCAGAGCAAGCATGGTTGACATTTGAGCTGCAATTT	TGCTTAAATGTTAACATGTGA	chr14: 4441762 4441782	21	vvi_miC512a-3p	CATGGTTGACATTTGAGCTGC	chr14: 4441825 4441845	21																			vvi-miRn023a
vvi_miC512b-5p	GGATATCAGAGGAGGAAGAAATGGCTTCACATGGCATAAACCAAGGTAACCGGTTCTTTTTTTGCTATTAAATGCATGCTTAAATGTTAACATGTGATCCTATACTATTTCAATTCTCTTTTTTTGGTATCAGAGCAAAGCATGGTTGACATTTGAGCTGCAATTT	TGCTTAAATGTTAACATGTGA	chr5: 24111944 24111924	21	vvi_miC512b-3p	CATGGTTGACATTTGAGCTGC	chr5: 24111880 24111860	21																			vvi-miRn023b
vvi_miC512c-5p	ATGCATGCTTAAATGTTAACATGTGATCCTATGCTACTTCAATTCTCTTCAATTGGTATCAGAGCCAGCATGGTTGACATTTGAGCTGCAATTT	TGCTTAAATGTTAACATGTGA	chrUn: 17317340 17317360	21	vvi_miC512c-3p	CATGGTTGACATTTGAGCTGC	chrUn: 17317403 17317423	21																			vvi-miRn023c
vvi_miC512d-5p	ATGCATGCTTAAATGTTAACATGTGATCCTATAATATTTAAATTCTCTTCAATTGGTATCAGAGCAAGCATGGTTGACATTTGAGCTGCAATTT	TGCTTAAATGTTAACATGTGA	chr14: 3662717 3662737	21	vvi_miC512d-3p	CATGGTTGACATTTGAGCTGC	chr14: 3662780 3662800	21																			vvi-miRn023d
vvi_miC513-5p	GGATTAATTTTATTCACCTTCCTTGAGGTTTTGGCCAAGTATACTTGATCCTCATTAGTTTGAAATTTCATCAAATATTTCCTTTATTTTGAGTGAGAGGTGAGCGAAAATAAAAAATGAAAAGGCTAGGGGAGGTGAATTCATTTCATTTGTTATTTTCATTTGCTAAACACCTTTATCATTTTTATTTGTTATTTTTACTCATCTCTCCTCTTTCTCAAAACAAGGGAGATATTTGATGAAATTTTAAACTAATAGAGGCTAGTTGTATTTAGCCAAAGCCTTAGGGAAGGTGAATGAAATTAACCC	AAATATTTCCTTTATTTTGAGTGA	chr5: 3289728 3289751	24	vvi_miC513-3p	TCTCAAAACAAGGGAGATATTTGA	chr5: 3289871 3289894	24																			vvi-miRn029
vvi_miC514-5p	TGGAAGATTTATGGTTTACGTATAAATGTCCAATGACTATACCTCAAATTGCTTAACTGAACTTAAAGGATGGATAGTAATGGGAAGATTTATGCTTTTGCATTTGGAAAATTTATCCTTTAAGTTTAGTTAAGTAATTTGGAGTATGATCATTGGAATAACCAGTAATGTATCA	AAATTGCTTAACTGAACTTAAAGG	chr8: 17411099 17411076	24	vvi_miC514-3p	TTTAAGTTTAGTTAAGTAATTTGG	chr8: 17411026 17411003	24																			vvi-miRn030
vvi_miC515-5p	AGGTGGTGTTTGTTTTTTGGTTGGATAAAAAAAAACCAAAATATTTGGTTTTTTCTATTTAATGAAAAGTAACTTGTTGATAATAACCAACATAACTAAAATAAACTTGTTATCAATAGGTTTAATTTAGTCATGTTGGTTGATGTCAACAGGTTACTTTTAACTTATTAGAAAAAGTTAAATATTTTGATTTTTTATGTTCAATCAAAATACAAATGTCACCT	AACCAACATAACTAAAATAAACTT	chr19: 18060880 18060993	24	vvi_miC515-3p	GTTTAATTTAGTCATGTTGGTTGA	chr19: 18060915 18060938	24																			vvi-miRn031
vvi_miC516-5p	GAAAAAAATTCATTCTAACCACTTTCCCACATTAATGTGCAAAATAATTCTTTTGTTGCCATGAAAGAGTCTCCTCATTTTAATTTTTTTTTTTAATATAGGCTGAAACCACATTTAGCAAAATGCAGTTTCAATTTTGAACTTTTTGTACTTTTAACTTCACATTTTTACATTTTTTTTTATGAATTTTTATTTATTTTGTCTTATTTATTCATATAACGTCATTATTGTAAGATTATTGATTTATTGATAAATAAAATAGTAATTTATTATTATTTCTAAAAAATTATCTTTATTGAAGTAATTCTAGACCCTTAAGTCCTTAAGTTTAAATATATAAATTTTTTATTATTAAAATATATATTTTAAATTTAACATAAATAAGAGTATGAATTAATA…	AACCACTTTCCCACATTAATGTGC	chr3: 14576576 14576553	24	vvi_miC516-3p	ACATTAGTTTGGGAAAGTGGTTGG	chr3: 14575888 14575865	24																			vvi-miRn032
vvi_miC517-5p	TGCATAATACCAATGTTTTTAGAACCGGACCGGTCATTGAACCGGAAAAGTTACCTATTTACGGTTCACTGATCGGACCGGTGGTAAAACTGCA	AACCGGACCGGTCATTGAACCGGA	chr13: 23251654 23251677	24	vvi_miC517-3p	CGGTTCACTGATCGGACCGGTGGT	chr13: 23251693 23251716	24																			vvi-miRn033
vvi_miC518-5p	TTAATATTACAAAATTGGTATAATTTTGATTTAGAGTGTGTTTGATAGTGATTCTATAAAACGTTTTTAGTCTTTTTAACACTTTAATAATAAAATTTTTAAAGTGTTAAAAATATTAAAAGCGTTTTATAAAATCACTATCAAACATACTCTTATTCTACAATTAATTATAAAGCTTAGTATTAA	AACGTTTTTAGTCTTTTTAACACT	chr18: 12197083 12197060	24	vvi_miC518-3p	TGTTAAAAATATTAAAAGCGTTTT	chr18: 12197038 12197015	24																			vvi-miRn036
vvi_miC519-5p	TTATGTTAATGCTTCTGGTGGGAAATCACTTTGTACAATTTGAATATGTTTAATGATTGGAAATGGGTCTTTAATTTGTGACTTAATATTTGGTAAAATTTGGCTATTTTTTATGGTGACACATACATCGTGAGATGATTGGCTGTCACCATAAACAATAGCCAAATTTTACGGAACATTAAGTAAAAAATTTAAGACCCATTTCCAATCATTAAACACATTCAAATTGTACAGAGTGATTTCCTACCAGAAGTATTAACATAA	AATATGTTTAATGATTGGAAATGG	chrUn: 7194057 7194034	24	vvi_miC519-3p	ATTTCCAATCATTAAACACATTCA	chrUn: 7193899 7193876	24																			vvi-miRn039
vvi_miC520-5p	ATGGCCATCTTATTTCATTCTCCATCATGAATTTTGATGAAGAACGATGTCATATTTTGGGATTTATCTTACAAATGACATCCTTCTGTATCAAATTTGGTGAGGAGAAATTGGCTGTGATGGTCAT	AATTTTGATGAAGAACGATGTCAT	chr17: 8114446 8114469	24	vvi_miC520-3p	GACATCCTTCTGTATCAAATTTGG	chr17: 8114493 8114516	24																			vvi-miRn042
vvi_miC521-5p	TATCACACCACAAGTAATGCCAATAGCATGTTATATACTGTACACATGATCATTAGGTCATGTGTACAGTATATAACATGCTATTGGCATTACTTGTGGTGTGATG	ACAAGTAATGCCAATAGCATG	chr14: 21892268 21892288	21	vvi_miC521-3p	TGCTATTGGCATTACTTGTGG	chr14: 21892337 21892357	21																			vvi-miRn043
vvi_miC522-5p	GGAAAGATTACTCAGATTGTAAATTTTGCATTCCTAAGTGCTTCACATAACTCCAGAATATCATGTCTCAATTTACCCAGGTAACAACATCATCATTCATCAGAGACATGTCAGTGAAACAGCCAAATGTTGAGACATGATATTCTGGAGTTATGTGAAGCACAAAAAGCAGCAAAACAGTTGGTTTTCTTTTC	ACATAACTCCAGAATATCATG	chr8: 12353672 12353692	21	vvi_miC522-3p	TGATATTCTGGAGTTATGTGA	chr8: 12353765 12353785	21																			vvi-miRn045
vvi_miC523-5p	ATGGAAGGAGACATGGACGCTCACAACGCCGACGTCGATATGGCCACCAACGACGACGACGCTGTGAAGGTCCTTTCTCTCTACCTCCAT	ACGCTCACAACGCCGACGTCG	chrUn: 33167856 33167836	21	vvi_miC523-3p	ACGACGACGCTGTGAAGGTCC	chrUn: 33167820 33167800	21																			vvi-miRn047
vvi_miC524-5p	AATTTCTCTTATGTTTAACAATATTCATGATTAAAACATTTCATTTTACAAATAATTTTTTTTATATTATATTATTTAATATATGAAAATAATTTGTAAATATTATGATACATGAGATATGCATATCTCATATTTTAGTATGAGATTAACATATCCCATGTAGAAGGGATAAAAAAAGGGTGGATAATATATCCCACTACTTATCTTAGGTCATGTTTGGTTGGCCAGATATAGCATAGGATAGGATAAGAGAGGGGATATTATATCCTATCCTATGTTTGGTTGATGATAGAATAGGATAAATTATCATATCCTATGTTTAACCAAACATGGGATAAGATAAGTGGTGGGATATATTATCTATCTTTTTTTTTTATCCCTTCTACATGGAATATGTTA…	ACTTATCTTAGGTCATGTTTGGTT	chr6: 836721 836698	24	vvi_miC524-3p	CCAAACATGGGATAAGATAAGTGG	chr6: 836596 836573	24																			vvi-miRn048
vvi_miC525-5p	GATACTATCATTACCATCACTTTTATCATCATTTTTATCACTTGTTGATGTGGTAGGTAGTCATTGGTGGTAAAAGGATAATAAAAGCAAAATAAGAATGTTCTATTTTGTTTAATTCTTGTTTCCATTTTTTAAAACTAATCACTATCTTTTACATCATTAAGTGATAAAAATGGTGATTGAAGTGGTGGTATGTATGGTATC	ACTTTTATCATCATTTTTATCACT	chr2: 16568884 16568861	24	vvi_miC525-3p	TGATAAAAATGGTGATTGAAGTGG	chr2: 16568738 16568715	24																			vvi-miRn049
vvi_miC526-5p	TCTATTAAACAAAGTCTTCATACCAAGGGGGCATTTTTTTTTTTTTCGTCAGCAAAACACAACGTTTTAGACTGGTTTGGATTTAAAGAAAGCACATGGGTCAATATGACATCATTTTGCCCTTTTCTTTACCCTTGTTTTTTCTTTAAAACCAAATCAGTCCAAAATGCTGCATTTTGTTGGTAAAGTAAAAACAAAAAAATGCCTTAATTTGGGTTGGAAGTGGA	AGACTGGTTTGGATTTAAAGAAAG	chr8: 22375982 22375959	24	vvi_miC526-3p	TTCTTTAAAACCAAATCAGTCCAA	chr8: 22375909 22375886	24																			vvi-miRn050
vvi_miC527-5p	ATTTATGAAAAATCTTTAAAAATTGTAAATCACTTTAAGTGTGTTTGATAGTGATTTTAT GAACTATATTTGATATTTCTAATATCTAAAAACTTAAAATTTTCAAATAAAAAAAATATTAGAAATGTTTTCTAAAATCATTGTCAAACGCATTCTTAATATTTTCTAAACATTTCATAAAT	AGTGTGTTTGATAGTGATTTT	chr17: 1355103 1355123	21	vvi_miC527-3p	AATCATTGTCAAACGCATTCT	chr17: 1355201 1355221	21																			vvi-miRn054
vvi_miC528-5p	TTTTATCAAAGTTTGTGTGACTGAGACTTTGGCTGGAAATAGACCAAATAGTCACTTTAGCAAGTTGGGATAGAA	AGTTTGTGTGACTGAGACTTTGGC	chr1: 10373896 10373873	24	vvi_miC528-3p	CAAATAGTCACTTTAGCAAGTTGG	chr1: 10373861 10373838	24																			vvi-miRn055
vvi_miC529-5p	TAGACTGCCTTCAGACTCATTTTGGATGATAGAAATGTGACAGAAAGGAATGGGAAATGCTAAAATTGGTTGAGGAGAGGAGTGCATTTTAAAGTAATTTTTAGCATTTTCCTTTCCCTTTTGTCATTGTTTCAAAGATCCAAACAGTGGTTTAGCAGTTTG	ATAGAAATGTGACAGAAAGG	chr15: 17283397 17283416	20	vvi_miC529-3p	CTTTTGTCATTGTTTCAAAGA	chr15: 17283486 17283506	21																			vvi-miRn056
vvi_miC530-5p	ATTTTAAATTTCATAGCTACTTGTATGAACCAACCATTTGAACTAGAAGGTAAGATATACAAACAATTAAACAACTTATATAAATATTATGAAAATAAATATGTTAGTGCGTCTTCAAGTACTATAACTCCATCTGCATTTGGAAATGATTCATTTTTTATGCAATTAGATAAGGGAAAGCAACAAGTTGGTCCTTCAAGTAGGTGTGATCTTCAAAAT	ATAGCTACTTGTATGAACCAACCA	chr5: 20189140 20189117	24	vvi_miC530-3p	GTTGGTCCTTCAAGTAGGTGTGA	chr5: 20188966 20188944	23																			vvi-miRn057
vvi_miC531-5p	CAAGGATTGCAAATATTGGTTAAGTTCACTGTTAAAAAAGCCTAACATAGGTGCATAGGACAGGACATTGATTATCAAATGATTGGTTTCATTGCATATGTGTGACAACGATTGCAAATATTGGTTAAGTACAATGTTAAAAAAGCCTAAAGGATTTGATAATCAACGTCCTGTCCTATGCACCTATGTTAGGCTTTTTTAACAGTGTATTTAACCAATATTTGCCATCCTTG	ATAGGACAGGACATTGATTATCAA	chr10: 2745012 2744989	24	vvi_miC531-3p	GATAATCAACGTCCTGTCCTATGC	chr10: 2744909 2744886	24																			vvi-miRn058
vvi_miC532-5p	TATGGGTTAATTTCACTCACTTCTCTTAAGGTTTGGGTTAAATATATTTAGCCACCATTAATTTGAAATTTCATTATATACCTACCTATCGAGTCAAAAGGGAGTTGAGTGAAATTAACCTATGAAAAAGGAAAGGGAGATATTTGACGAAATCTCAAACTAATGGTGGCTGAGTATATTTAGCCCAAACCTCAGAGAAGGGGAGGGAAATTAACTCTTA	CACCATTAATTTGAAATTTCATTA	chr7: 8005564 8005587	24	vvi_miC532-3p	ACGAAATCTCAAACTAATGGTGGC	chr7: 8005658 8005681	24																			vvi-miRn062
vvi_miC533-5p	AGGATGCAGATCAATCATTCATCTATTGAGCATGAACGAGCAATTGTTCTTCCCACTTCCATTGTGATTGTGAATGATCAATCAGTTTGGATTGATTGTTCATGGTCAGGATGGGAGTGAGAAGAAAAGGTTGATTGTTTGCGCTCAGTAGCTGAATGATTAATCATTATTGTGTTTT	CACTTCCATTGTGATTGTGAATGA	chr5: 2917914 2917891	24	vvi_miC533-3p	GTTCATGGTCAGGATGGGAGTGAG	chr5: 2917870 2917847	24																			vvi-miRn063
vvi_miC534-5p	ATTATCTATTTTAAAGCAGTTGATGATATGATTGAATGCAAATTTCATTTGACTTGTTACATGATGATATACATGGATCAGTATTGTAATTTTTCTACCTAATAGTGCATTGGGAGTTGTGATCTTATAGAGTTTTAATTTCATATTGTTAAATTGTGAAATTGAAGAACATAGATTATCTTATTAAATGTAAGGTCAATGTATTTAGAGATGATCTTTAACGACAACTTTGGGTTACATCGACCTCATATTCCAAGAAGTAAGTCATGATATTTTTTCAACTTCACAATATGACGATATTGAATTAACATTCTATAAGATCACAACTCCCAATGACACTTTTAGGCAGAAAATCTACAA TACTAATCCATGGATCATTATCATGTAACAAGGCAAAT…	CATATTGTTAAATTGTGAAATTGA	chr11: 6244962 6244985	24	vvi_miC534-3p	AACTTCACAATATGACGATATTGA	chr11: 6245100 6245123	24																			vvi-miRn064
vvi_miC535-5p	TTACACTACCAATTTCTTTTATTATTTTTTATATATAAAAAGGTGTGATGAAATTATCCATTTACCCTAACCTTCTACCTCACCTAAAAACCCTAACCCTAATCCCTATCTCTTTCCCCTTCCTCTTATTGACCTTCATTTTCTTCTTAACTTCCATCTTCTTCACCTTCAATTTTGTTGTTGTCTATGAAAATGATTAAGGTGAATAACATGAAGTTGGAGAGAAAATGGAGGTAAGGGAGAGGAAAAGGAAGGAGATAGGGATTAGAGTTAGTTTTTAGGTGGGTTTAGGTGAGGCAAAAGATCAGGGCAAATGGGTGATTCCATAACACCATTTTAGATTTAAAAAACAATAAAAGATATCAGTGGTCTAA	CATTTACCCTAACCTTCTACCTCA	chr12: 4596820 4596797	24	vvi_miC535-3p	AGGCAAAAGATCAGGGCAAATGGG	chr12: 4596584 4596561	24																			vvi-miRn065
vvi_miC536-5p	TTATTGTCCCTGACGACTTTTTATATTTTGAAGTCATTGCTTAATAACATCATTATTTATGACATTAAATTATATATTTCTTAGCATAATCAAGTTACCATTCGTCCATTGGTCTCTCATTTAATTGTGCAATTAATTCTTCACAATGTTCATTGAAGAAAATGCCTCTCTATAGTATCAATGACAATTGGTATGATTACTGTTAAAGTTATTAGTAATTAAACTAATGAATGCATAGGGCATTGTGTATCCACGAGTTTATTTGCTTATAACATTGACACTAATTCTAGGGTAGCTATAGAGAGGACATTTTTTGCTATGAATAATTATAAAAAATTGATTGCACAATCAAATGGAAGA TCAATGAATCAATGATAGTTTGATAGTTTGTATTCAGA…	CCATTGGTCTCTCATTTAATTGTG	chr4: 16176893 16176916	24	vvi_miC536-3p	CAATCAAATGGAAGATCAATGAAT	chr4: 16177133 16177156	24																			vvi-miRn066
vvi_miC537-5p	TCCTTCTGTTTGGCTTCCGAGAGAACTGAGGAAAAGAATAGGAAACGGAATTTTGAAACTTTCATGTCACTCCGTTTTGGTTTAGTGAGATTTGAGCGGCCAGGCTCAATTGAAATAAGGAGTTGAAATTAGGCGCAGTTGATGGAGGTTCTTTCGTTTTTTTCTGCGCCAATTTATGAGATTTATTATATCCGAAATTTTATTCTCTTTTCTTTGCCTCCGTTTTCTTGGGAAGCAAACTGTGGA	CCGAGAGAACTGAGGAAAAGA	chr17: 12479300 12479320	21	vvi_miC537-3p	TTTGCCTCCGTTTTCTTGGGA	chr17: 12479496 12479516	21																			vvi-miRn067
vvi_miC538-5p	ATGATTCATATTTGCTTAGAGCCCGTTTGGTAGTGATTTTAGGAAACGCTTCTAACATTTTTAATACTTGAAAATTTTCATCATTCAAGTGTTAGAAAGATTAAAACGTTTTCTAGAATCACTACCAAATGGACTCTTAGTTTACTCTGTGTTATCAT	CCGTTTGGTAGTGATTTTAGG	chr5: 24743122 24743142	21	vvi_miC538-3p	TAGAATCACTACCAAATGGAC	chr5: 24743213 24743233	21																			vvi-miRn068
vvi_miC539-5p	CATTCACCTCCCCTAAGGTTTTGGCTAAATACATCTAACCTCCCTTATTTTGAGTGAGAGGGGAAGCAAGTGAAAATAAGAAATGAAAAGGATAGGGGAGGTATTTGATGGAATTTCAGACGTATGAGAGTTAAAATGTATTTAGCCGAAACCTTAGGGAAGGTGAATG	CCTAAGGTTTTGGCTAAATA	chr9: 2313099 2313118	20	vvi_miC539-3p	TTTAGCCGAAACCTTAGGGA	chr9: 2313228 2313247	20																			vvi-miRn069
vvi_miC540-5p	GGGTGTTGGAGTTGGATTCGGATTTTGTACCTGATTGACGATGAAGAAGTCTCAGAAGAAATTGCCGAATGAGAAATTGCTGATTTCACATTCATCAATTTTTTTCTCAGTCTTCATCATCTATCAGGTACAAATTCTTTAATCCTGTGTTTCTTTTTCTTGATATCC	CCTGATTGACGATGAAGAAGT	chr2: 13973947 13973967	21	vvi_miC540-3p	GTCTTCATCATCTATCAGGTA	chr2: 13974027 13974047	21																			vvi-miRn071
vvi_miC541-5p	GGCTCGATAAATGGGGGAAATGAACAAACAGTGAGGTTCAAACTCATGACCTTCAATAAACAAGATTTGTACCATGTTTAATGACCATTGTATTAGGGTCAAATTAGTGGCTTAACATAGTACAAGAGCTTTATTTATGGGAAGTCATGAGTTCAAATTTTACTGCTTGTTTGTTTCACCAATTTATTGAGCC	CGATAAATGGGGGAAATGAACAAA	chr11: 6267942 6267919	24	vvi_miC541-3p	TGTTTGTTTCACCAATTTATTGAG	chr11: 6267779 6267756	24																			vvi-miRn072
vvi_miC542-5p	GTGAGCTTGAACCACGGCTACAATGATGTCCCGGTTCGGATCCAGCCGGACGGTGGGACTCTGGTGGGTGGGTCAAGGGCAT	CTACAATGATGTCCCGGTTCGGAT	chr8: 18584409 185843086	24	vvi_miC542-3p	CCGGACGGTGGGACTCTGGTGGGT	chr8: 18584381 18584358	24																			vvi-miRn073
vvi_miC543-5p	AACTTTGGAGGCATCCACAGGATCATGGATCCTTCTTTCACAGAAATACACTGTTAATGTCTCCTTTCTATTTCTAAATCTTTGGTAGTGAATGTGCAATTTAGAAATAGAAAGGAAGTATCAACAGTGTATTTCTCTGAAAGAAGGATCCGTCCTCTTGTGACTGCTTCTTGTT	CTTCTTTCACAGAAATACACTGTT	chr1: 22513393 22513416	24	vvi_miC543-3p	CAGTGTATTTCTCTGAAAGAAGGA	chr1: 22513486 22513509	24																			vvi-miRn076
vvi_miC544-5p	GGTCCATAACTCTCTCAACTTTGGAATGTATCTATGCATACTAGATGGGTTATCTTTTATAAAGAACTTCTTTCCCTAAGTAACATCGGATATCACTAAAAAGAAAATTATACAACCTAGTAGCATGGTCCTTACCTTGTTTGCGCTTGATTGTGCTTCAAGCCCTGCCATCATTGGTTGGAATTTGAAAGAAGTGTTACATGGCATTACCTGGGGGAGAAGTTTCTAATCCTCATAGGGGGTGATTCATTTGGTATGTGTAGATGCATTTTAGAGTCATGTGAACTGGTGATCC	CTTTGGAATGTATCTATGCATACT	chr9: 1918915 1918938	24	vvi_miC544-3p	TATGTGTAGATGCATTTTAGAGTC	chr9: 1919151 1919174	24																			vvi-miRn078
vvi_miC545-5p	GGGTACAGAGCTTAATATCTGGTAAATCATTTGTGTATCTGCCTCTTTTAATAGAGCAATCATAGAAATCTTGTCAGTAATTTCTCGCCTAATGCCTTTGTAGTTTGCACTCATCAAGAAATTGTTTTTCTTTAATTTCTCATGCTATTGATATAAATGGCCTGATGGGTCATTGTGCCTGCATTAGTTAGTGGTCATCTAGACCTAGTTTTTGAGGGTGAGCTTCATAGTGATGCAGGTGCCATTATCTTCAGACCGTTTACATCAGTGATACCATATTTGTGAGAAATTGAAAGAAAAAGAATTTTTTGGTTAGGGTAAACCACAAAGGCCTAAAGTGGGAAATTACTGATAAAATGTGCATGACTTTTCTATTTAGAAAAGGCAGATGCATAAACG…	CTTTGTAGTTTGCACTCATCAAGA	chr5: 649784 649761	24	vvi_miC545-3p	TTGGTTAGGGTAAACCACAAAGGC	chr5: 649571 649548	24																			vvi-miRn079
vvi_miC546-5p	TTCTTTTCTCCGTTTTCCAGTTATCAAACAGATTTTTGTAGATTTCTACGAATCTCTCAAATCTCTGTTTGGTTTGTGAGAAAATGGAGGAAACGGA	GTTTTCCAGTTATCAAACAGA	chr2: 10033656 10033676	21	vvi_miC546-3p	TGTTTGGTTTGTGAGAAAATGG	chr2: 10033710 10033731	22																			vvi-miRn082
vvi_miC547-5p	CCCTTGAGAACGAGTCATAGGAATTCTAAAAATTAGATGTAATTATGGCAAAAAATTTCTAATGCCATAATTACATCTAATTTTTAGAATTTCTATGTTATTTGACTCTTTGG	TAAAAATTAGATGTAATTATGGCA	chr14: 27265996 27266019	24	vvi_miC547-3p	CCATAATTACATCTAATTTTTAGA	chr14: 27266034 27266057	24																			vvi-miRn083
vvi_miC548-5p	CATGCTCTCTGATACCCTCCTTCACATGCAGCCACCATTTTTTGCAACACATGGGCCTAATAAATTGAAGAAATAAACATACGGTGATGAGGTTCGAACAGTCATCCTCCCTCCAAACGAGGCTCTAATATCATGTTGAACAACCAATTTTTCTAAAAGCTTAACCATTTGGAAAATTAGTTGTTCAATATGATATTAGAACCTCATTTAGTGAGAGGTCAAGTGTTCAAGCCTCATCAATGTATGTTTATTTCCCCAACTTATTAAGCCCACGTGTAATCCCAAAGGAGGCTACACACGAGGGATGGTGTTAGAGTGCATG	TAAACATACGGTGATGAGGTTCGA	chr8: 2752466 2752489	24	vvi_miC548-3p	AAGCCTCATCAATGTATGTTTATT	chr8: 2752621 2752644	24																			vvi-miRn084
vvi_miC549-5p	TGCTCCCCTTATACCAATGTAAGTATATCGTAACTTTGTTTTCCCAGTCAAGGGCACCTATCAAAAAAAAAAAATATATATATATATAGCAAAGCCTTTGACGGGGAAAACAAAGTTATGATATACTTACATTGGTATAAGGGGAGCA	TAACTTTGTTTTCCCAGTCAAGGG	chr6: 4608662 4608685	24	vvi_miC549-3p	TTTGACGGGGAAAACAAAGTTATG	chr6: 4608728 4608751	24																			vvi-miRn085
vvi_miC550-5p	AACAATTTATTCCTCATGTATAGCTATTGTGCACTTTAAGCATAAAGTGCACACAGCCTTAAAACACATTCACATAGTTAAGAGAAGTCTATTATATATAAAAGTGTTAGGAACTTCCCTTCCTAATCCATGTGAGATGCATTTCATATGTAGCGGACTTGTTTTTATATGTAATGGACTCCTATTAGCCATTTGGATACATTTTGATGTTGTGCAAACTTTGGGCCCAAAGAGGAGAATATCTATATATATGAGATAACTGGTT	TAAGAGAAGTCTATTATATATAAA	chr1: 22701413 22701390	24	vvi_miC550-3p	TATATGTAATGGACTCCTATTAGC	chr1: 22701326 22701303	24																			vvi-miRn086
vvi_miC551-5p	TTAGAGCTCATTTAAGAGTGATTTTAAAAATTGTTTTTAACATTTCTAATACTTGAATAATAAAAAATTTCAAGTATTAGAAATATTAAAAGCGTTTCCTAAGATCACTGTCAAATGGACTCTTATTGTTTCTATTAATGATACTAAGAGTGCATTTGAGAGTAATTTTAGAAAATGTTTTTAGTATTTCTAACACTTGAATAATAAATTTTTTCAAGTATTAAAAATATTAAAAGCGTTTTTTAGAATTACTACCAAACGGGCTCTAA	TAAGATCACTGTCAAATGGACTCT	chr5: 1699362 1699339	24	vvi_miC551-3p	AGTGCATTTGAGAGTAATTTTAGA	chr5: 1699313 1699290	24																			vvi-miRn087
vvi_miC552-5p	GTCTTAATACAACTACCAAAACGCCATAGTGAACCATCTAGCCTTTCTCTTTGGCGTTTTGGTAGTTGTATTAAGAC	TAATACAACTACCAAAACGCC	chr4: 15753750 15753730	21	vvi_miC552-3p	CGTTTTGGTAGTTGTATTAAG	chr4: 15753700 15753680	21																			vvi-miRn088
vvi_miC553-5p	TTTCACAATTCAAGCAGAGTCTTCAACCTTGAAATTCTCCGAGAAAAATCAAATGTAGAAAATGGAGTTAAAAAAATCTTAGAATCCCGAGGAGAACAGGAGAGCAGTTCAAGAAATTCAAATGCCTATCCTAAAGGATGCATCTCTTGCAAACCTAAACCTGGCCGGTCCGCACCAACACACGTATTATTAAAGTGTTACACATGTAGTGCCATCATATGAAGAAAAGTGTATGATTTTTTTAATCAATCAGTTCTTTATATTATGGGACTACATGTGTTACACTTTGATGACATGTGGGTTAGTGTGGACCGGGAGAGGTTTAAGTTTGTAGGGGATAGATACATCCTTTGGGCATAAGCGTTTGAATTAGTGGAGCCACTCTCTTTTTCTCCTCTA…	TACACATGTAGTGCCATCATATGA	chr3: 17925436 17925413	24	vvi_miC553-3p	ATATTATGGGACTACATGTGTTAC	chr3: 17925375 17925352	21																			vvi-miRn089
vvi_miC554-5p	TTTAGGTTCATATTTTAGAGCTTCCTGTATATTTTTAGGTTTTATCTCACAACTATCTAGTATGGATGAAGCTAAAAATATACAGGAAGCTCTAAATGTTCCTGAA	TAGAGCTTCCTGTATATTTTT	chr18: 14220557 14220577	21	vvi_miC554-3p	AAATATACAGGAAGCTCTAAA	chr18: 14220617 14220637	21																			vvi-miRn091
vvi_miC555-5p	CTTCTATATAAAAATAGAAACTTTTATATAAAAAGTATAGGCTTGCCTTGTTTTCTAAAAAATTGCTTTCATAGATTTTAAAATTTGAGGTAGTAAATTTTTTTTAATATCTCAATTTTTTTTTTAAAGTAATTTTCAAAAACCATTACCTTTTTAATATAAGCCTCGAAGAATTTTTGTATTTTATATAAAAGTTACTATTATTTTCTATTTTCAAAAATACAAAGTAGGAAGTGTATCCAAATGGATACTAATATGCTTATTTGGATACACTTCTTGTTTTTTGTTTTTAAAATAAAAAATAGTAATAACTTTTGTATAAGATATAAGAAACTCTTAGAAGCTTATATTGAAAAGGTAACAATTTTTAAAACTATTATAAAAATCATGGTATCAAAA…	TAGATTTTAAAATTTGAGGTAGTA	chr5: 13771126 13771103	24	vvi_miC555-3p	CTACGTCTAATTTTAAAATCTCTG	chr5: 13770790 13770767	24																			vvi-miRn092
vvi_miC556-5p	TCAAACTAAATTTGTTTTCAAAATATTCCCTAGAGTAGTGCATCCATACCATGTCAGCATCTACACATTATTATTATTATTTTTTTATGACAAAACCATAGATGTTGACTTTGGTTTTAGCTTTAAGATTAAAACCACGGTCATCAACTGTGGTTTTAACTTTAAAGCTAAAACCACAATTGGTGGCTATGGCTTTGCCATGAAAAAATAATAAAATAAAAGTTGATGTGGCTAGGAGATTAGTTTGGTAAATATTTTGAAAAGTAATCTAGATGTGA	TAGCTTTAAGATTAAAACCACGGT	chr8: 13324877 13324900	24	vvi_miC556-3p	TGTGGTTTTAACTTTAAAGCTAAA	chr8: 13324908 13324931	24																			vvi-miRn094
vvi_miC557-5p	ATATATATATAATGTCAGAAACTTTTTCTTTTATCCAATGTGGGGTGTCACAATCACCCCTTGTATAGACTCATTTTTTTCGTGTCCCATAGGATTGTAAGGTCAAATAGATATACACCCCTTACGGGACCAAACAAACTCTTACATTAGGGTCGGGGATCCTTAACTCTGGTATGAGAGTTTGTTTGGCCCCACTAAAGAGTTTGTCTGGCTTCACTAAGTGGTGTTTGTCTGTTTGATTTTGCAATCTTGTGGGACATGAGGACGTTGTGTTTGCATATGGGGTTGGTGGTTGTGATATTCCATATCAGATAGGGGAAAAAAGTTCTTGCACTATATAGCTAT	TAGGATTGTAAGGTCAAATAGATA	chr15: 9628791 9628768	24	vvi_miC557-3p	TCTGTTTGATTTTGCAATCTTGTG	chr15: 9628650 9628627	24																			vvi-miRn095
vvi_miC558-5p	TATAGAAGATTAGACTCTAAGGCCCAAACTATGATTTGGAATACTTTGGATGATAATGGGCCTAGTTGAGATTTTATATAATTCAAGGTAGATTTCTGCCCAAGTATATTCACCTTGCATTATATAAAATCTCAACTAGGCCAATTATCATCCAAAGTATGCCAAATCAGAATTTGGGCCTTAGAGTCTAATCTTTGATG	TAGTTGAGATTTTATATAATT	chr19: 10790714 10790694	21	vvi_miC558-3p	TTATATAAAATCTCAACTAGG	chr19: 10790657 10790637	21																			vvi-miRn097
vvi_miC559-5p	TTCGTGCTTGTTACATAATTGTTATCGGTAAATTGCAAATCTGAGTCTACACTAATAAAAGAACTAGTAAATCTTTATATAAAAAGATATTAGTCTAACGAACCTCTGATATCAATCTGCTTCTAATGTGATGATCTTCTGGAATATCACTAGCTTGTCCTGTGGCTGTGTCTGGGATTATGATGAGCCACCCTGAATTGCTAGTTGTGTCCCTTTGCCAGAAAGAACCACGCGATATCCAACAAAGAACTGCTCCTTCTGCAGACCAAGAAATTCGGTACCTACTGCTACCATGTCCAGTGTTGAGACTACATGGAACCCAGCCAACCTTCATTTGCTTCTATATATATATATATATATTGGGCACCATACTAGACCCACCTCACACATGGTAGTAGC…	TAGTTGTGTCCCTTTGCCAGA	chr10: 789510 789490	21	vvi_miC559-3p	TGGCAAAGGAACACAACTCGC	chr10: 789243 789223	21																			vvi-miRn098
vvi_miC560-5p	TGCCTACTTCACATTACTTGAAAAATGTTTTTATATGTGTATATGAGTTGCCACTTATATCGGCCTAACTCACATGAGGATGGTATATCATTCAACAAATAAATGTACTTTGAGCTCAAAACAATGTTATTTTAAGCTCAAAATAGTATTATTTTAATATTAAAACATAAGTAAGGACATTTTTTTGGTAATGTGAGATAGACA	TCACATTACTTGAAAAATGTTTTT	chr11: 2558887 2558864	24	vvi_miC560-3p	GGACATTTTTTTGGTAATGTGAGA	chr11: 2558721 2558698	24																			vvi-miRn099
vvi_miC561-5p	GGCAATCTCAAAAACTTACTGAAGGAAACAAAATTAATGAATATTGACAGTTCAGATTATATGGAATAATTGTCTAGAAACATTTCTTTGTATGTTTTAAACATCTAGACTGTTATTGTATATGATCTGAGCTGTCGATACACAAGGTTATGACCTGGTAATTGGGACC	TCAGATTATATGGAATAATTGTCT	chr13: 20645490 20645467	24	vvi_miC561-3p	ACTGTTATTGTATATGATCTGAGC	chr13: 20645433 20645410	24																			vvi-miRn100
vvi_miC562-5p	GACTTTATTATCTGATCATTATTCCCCAACTCCTTGGGAGTTTTGACACTCGCTATTTGTTTTTACCTATAAAAAAAAATAGTGAGTTTTATAACTCCCTAGGAGGTGGGGAATGATGATCAGATAATAAAGTC	TCATTATTCCCCAACTCCTTGGGA	chr6: 5321760 5321783	24	vvi_miC562-3p	CCTAGGAGGTGGGGAATGATGATC	chr6: 5321842 5321868	24																			vvi-miRn101
vvi_miC563-5p	ATTATTATTATTATTAGGGTTAATTTCATTGAGACCCCTTGAGGTTTAGTGTAAATATACTAAGCCACCACAGGTTTCGAATTTTGTCAGTTAGCACCTTTATAAATTTATTTCCTCTATAAATTTTATTTTTTAAAGAATAAAATTCATATTTTGGAGAATTTGTTGAACACTCTTATCTAAAATATTTTTAACTAAAATCTCTTTAAAAAATCATTTTATAGACGAAATAAATTTATAGGAGTGCTAATTGATGAAGTTTGAAACCAATGGTGATTAGGTGTATTTACACCAAACCTTAGGGGTCTCAATGGAATTAACCCTTATTGTTATTATTAT	TCGAATTTTGTCAGTTAGCACCTT	chr4: 12796202 12796225	24	vvi_miC563-3p	AGTGCTAATTGATGAAGTTTGAAA	chr4: 12796368 12796391	24																			vvi-miRn103
vvi_miC564-5p	AAAATTTAAACTTGTATGCTCGGTACTTCCTGGTTGCATAGGAAAATATGTAATACCTAGTAGTAATGAATATTTTCCTATGCAACCAGGAAGTACCGAGCATACAAGTTTAAATTTT	TCGGTACTTCCTGGTTGCATAGGA	chr12: 20318104 20318127	24	vvi_miC564-3p	CTATGCAACCAGGAAGTACCGAGC	chr12: 20318162 20318185	24																			vvi-miRn104
vvi_miC565-5p	AAGTCTCACCTAGAACAAAAGTAATAGAGTAATTAACATTATTCATTATCAAGGGTAAGAAGACTCCATTACTTTTGTTCTAGGTGAGACTT	TCTCACCTAGAACAAAAGTAA	chr5: 12322786 12322766	21	vvi_miC565-3p	ACTTTTGTTCTAGGTGAGACT	chr5: 12322719 12322699	21																			vvi-miRn105
vvi_miC566-5p	TTCCAATTAAATAATTTTTTTAAAGGGATTGTTTTTTTTTTTTTTTTGGGAAATTGTCTCTTGAAGAGATGATTTCCACTTAAATAATTTTTTTTAAAAATCGTCTTTTCAAAAGACGATTTTTGAGGGATTAATTTTTTTTTTTTTAACTTGTTTTGATGGAAATCGTCTTTTGAAAAGACAATTTCCAATCCCTGCAAAATCCGCTCTCCTACCTAGCAAAAATTGTCGTACATTTGGAA	TCTCTTGAAGAGATGATTTCCACT	chr5: 20638053 20638030	24	vvi_miC566-3p	TGGAAATCGTCTTTTGAAAAGACA	chr5: 20637950 20637927	24																			vvi-miRn106
vvi_miC567-5p	ATTGGTTGATATCAACATTGATGCCAGAGAGGGTACTCCTCTTTAGATCAGCTTTAAGTCCAGAAATATGTTTGGGCTTATTTCTGGACATAAAGTCAATCTAGAGAAGAGTACTCCCTTTGGCATCAATGTTGATTTGGATCAACACGAT	TCTTTAGATCAGCTTTAAGTCCAG	chr15: 9617091 9617068	24	vvi_miC567-3p	GGACATAAAGTCAATCTAGAGAAG	chr15: 9617045 9617022	24																			vvi-miRn108
vvi_miC568-5p	TGTCACACTTAACTTGGGCCCTAGGGCAACGACAGTCTTCATGTGCAATGAGTCTGAAGGTCCAACATGGAAATGATGCTTAAAACAATTGCAAGTAGTAAATCAAACAAGCTATTATTTGTTTTAAGCATAATTTTCATGTTGGGTCTTCTGATTGATATAAAATGACGGTCATGCCCTTGGATTCCTGAGTTCAAGGAATGATA	TGAAGGTCCAACATGGAAATGATG	chr15: 100068 100045	24	vvi_miC568-3p	TAATTTTCATGTTGGGTCTTCTGA	chr15: 99992 99969	24																			vvi-miRn109
vvi_miC569-5p	TTTGAGAGGATAATTGTGTAAAAAATCAATATGGTTGGATGATTTTATCCATTGGTTATGTTGAAGAAGCGAACCTATCCAAGTACGATTTAAAGAAAAGAAAAGAATCAAATGGTTAAATTTTTTTTAATCATATTGATTTTTTGTACAATTGTTCTCTTAA	TGAGAGGATAATTGTGTAAAAAAT	chr17: 8113717 8113740	24	vvi_miC569-3p	TTTTTGTACAATTGTTCTCTTAAG	chr17: 8113855 8113878	24																			vvi-miRn112
vvi_miC570-5p	ACAAATGGTATTAGAGTTGAGTCTTGATCTCGATGTGGAGGTTAGTTTGGACTCATGAGGGGTGTATGTTTCTTTGGCCTTGCAATCTTGTAGGACACAATGAGGATGTTGTGTGTGCATAGAGGGGGGATGATTATGATATCTCATATCGGATAAGGGAAAAATTTTCTGAGGCTATATATGTTTAGACTTCTCTTAACCTTGTAGACGTTTTTTTAATGCCATAAGGGCCCTTTAGGCCTGGAGCGAACAATATCTATATGGTTGGGAGCAAGTCATTACAAATTTGGATCGACCCGCTCCCAATTGTGTAATATTGTCCGGTTTAGGCTCAAAGGGCTCTTAAAGCTTTAAAACACATCTAATTGGTTAAGATGAACCCAGACATATATAGTGCTA…	TGATATCTCATATCGGATAAGGGA	chr3: 7488110 7488133	24	vvi_miC570-3p	CCTTATCTGATGTGGAATATCATA	chr3: 7488385 7488408	24																			vvi-miRn113
vvi_miC571-5p	GTCATCCATGTTAAATATTGGACTTAAATGCAATTATGAAGGAAACTTTGTCAAATAAGCATTTTCGCCCAATTAAAAATGCGTATTTGCTAGAGCTTCCTTCATAATTGCATTTTAGTCCAATATTTAATGTAGGCTTGGC	TGGACTTAAATGCAATTATGAAGG	chr4: 3930680 3930657	24	vvi_miC571-3p	TTCATAATTGCATTTTAGTCCAAT	chr4: 3930598 3930575	24																			vvi-miRn118
vvi_miC572-5p	AAAAACAAAAGGTCAAAATGGGAAGATAGCTGAAATTTGCCATTCACAAATTATTCAGATCAAGTATTTCGTGAATGACAAATTTCAGCTATCTTCCCATTTTGACCTTTTGTTTTT	TGGGAAGATAGCTGAAATTTG	chr18: 12553974 12553954	21	vvi_miC572-3p	AATTTCAGCTATCTTCCCATT	chr18: 12553912 12553892	21																			vvi-miRn119
vvi_miC573-5p	TTGAAAGAGTTGATTTTTAGCAGACTTTGATCTACTAAGTGGGAATCATTATATGATGGATCTCAATCCTTTTAGTGATGTTCATATGTTATTTTTTTTGTTGAGGCCATGATTTAGAGAATTACATGATGTTCCTTGGAAAAAAAAATATGCCATATTTGTAACATAGAAGGGAATGAGATCCACTACATGATGAGTTCCATTTAGTAGATCAAGTGTTCTACAAATCGATTCGATTTAA	TGGGAATCATTATATGATGGATCT	chr15: 19425617 19425640	24	vvi_miC573-3p	ATCCACTACATGATGAGTTCCATT	chr15: 19425758 19425781	24																			vvi-miRn120
vvi_miC574-5p	TTTAAATCATCAAATAATTTAGTGTCCATTTAGATACACTTCTTGTTTTTGTTTTTAAAAATAGAAAGTAGTAATAACTTATATATAAAATGTAGAAACTCTTATACAAAAAGTATAGGTTTACCGTTTACCTTATGTCCTTAACAATTACTTTAACAAATTTTAAAATTGTTAAGAGTTTTCGTATTTTATATAGAACTTGCTACCATTTTCTATTTTTACGTATAGCAAATAGGAAGTATATCTAAATGGACACTTAATTATCTGATTATATAAA	TGTCCATTTAGATACACTTCTTGT	chr18: 14212086 14212109	24	vvi_miC574-3p	AGGAAGTATATCTAAATGGACACT	chr18: 14212297 14212320	24																			vvi-miRn122
vvi_miC575-5p	GAGTGCGTTTGGTTGTGATTTTAGGAAGTGTTTCTAGTATTTCTAAAACTTGAAAATTTTTATCTTTCATATATTAAAGATGTTAGAAACACTTCGTAGAATCATTATCAAACACACTC	TGTGATTTTAGGAAGTGTTTCTAG	chr12: 8087067 8087044	24	vvi_miC575-3p	AGAAACACTTCGTAGAATCATTAT	chr12: 8086996 8086973	24																			vvi-miRn123
vvi_miC576-5p	TCTAAAAATGATTAGGATTTTGTGTACTTTTTGGTCAAAGGTAGTACCTTTGATCATTCAGGTACTACCTTTTAATGATATAGGTACTACTTTGACCATCCTGGGTATAACCTTTGACTGGTGAGTACATGAAACTTGAATTATTTTTAGA	TGTGTACTTTTTGGTCAAAGGTAG	chr1: 5536698 5536675	24	vvi_miC576-3p	ACCTTTGACTGGTGAGTACATGAA	chr1: 5536609 5536586	24																			vvi-miRn124
vvi_miC577-5p	TGTAAAAACTTAGAGTGTGTTTGGTAGTAATTCTAGAAAATGTTTTTAGTATTTTTAACACTTGAATGATAAAATTTTTCAAGCGTTAAAAAAGTTAGAAGTGCTTTCTAAAATCACTGCCAAATAGGATCTAACGTACTCTTAATATTTTTAATATTTGAAAATTTTTATCATTCAAGTGTTAGAAATATTATAAATGCTTTTTAGAATCACTCTCAAACACACTCTTACTTGATGGCA	TGTGTTTGGTAGTAATTCTAGAAA	chr12: 16415334 16415357	24	vvi_miC577-3p	TTTAGAATCACTCTCAAACACACT	chr12: 16415521 16415544	24																			vvi-miRn125
vvi_miC578-5p	GTCTCTTCTATACCCACATCATGTTGTTTGGTTCTTGAACTTGTGGCTAAAAGGGTTTTTTATGCTTGCATCCCAAGAAACACATGTAGCTACAAGTTCAAGAACCAAACAGCACAACAAGGGAAAAGAAGAGAC	TGTTTGGTTCTTGAACTTGTG	chr11: 13667383 13667363	21	vvi_miC578-3p	CAAGTTCAAGAACCAAACAGC	chr11: 13667315 13667295	21																			vvi-miRn126
vvi_miC579-5p	ACATGGTGGATAATATATCCCACTGCTTATCCTATCCCATGTTTGGTTGAACATAGGATAGGATAAGTGATAAGATGACTTATCGTATCCCATTATCAACCAAACATGGGATGGTATATAGCATCTCCTCTTTTATCCTATCTCATGCTATGT	TTTGGTTGAACATAGGATAGGATA	chr7: 7643499 7643476	24	vvi_miC579-3p	TCGTATCCCATTATCAACCAAACA	chr7: 7643458 7643435	24																			vvi-miRn128
vvi_miC580-5p	ATGTGAGCAAGTGAGAGACATTTTGGAACTAGAGTGCTTGCATTTATTTAAACACCAACATTTTAAATAAATGCTAGCACTCTTGTTTCAAAATGTCTCTCTCTTGCTTGCAT	TTTTGGAACTAGAGTGCTTGC	chr19: 5710130 5710110	24	vvi_miC580-3p	TAGCACTCTTGTTTCAAAATG	chr19: 5710076 5710056	21																			vvi-miRn129
vvi_miC581-5p	TATGAGATCTGAATTCTGGAGTGTGTTACTTGATCCTCTTGCAATATTCCATATCTAAGAGTGTGTTTGGCAGTGATTATAGGAAACGTTTTTAGCCTTTTTAACACTTGAACGACAAAAAATTTTAAGTGTTAGAAAGGTTAGAAACGCTTTTTAGAATCACTACCAAACGGGCTCTAAGTTTCATGGGATTTGAGTTTGGTTAAAACCTGGATGCATTTTAGATGGGTGTCTCATA	TTTTTAGCCTTTTTAACACTTGAA	chrUn: 7077637 7077660	24	vvi_miC581-3p	TAAGTGTTAGAAAGGTTAGAAACG	chrUn: 7077674 7077697	24																			vvi-miRn130
vvi_miC582-5p	TAGATAGACTGGTAGAAAGATTTATATATAAATCTTTCTACCAGTCTATCTATC	AGACTGGTAGAAAGATTTATA	chr18: 7061547 7061527	21	vvi_miC582-3p	TAAATCTTTCTACCAGTCTAT	chr18: 7061524 7061504	21																			vvi-miRn133
vvi_miC583-5p	TTTAAAAATAGTCAAAACCGTAGTCACCAACCACGATTTTAACTTTAAGTTTAAAACCGTAGTTGGTGACTACGACTTTGACTATTTTAAAA	ATAGTCAAAACCGTAGTCACC	chr10: 5961331 5961351	21	vvi_miC583-3p	TGACTACGACTTTGACTATTT	chr10: 5961390 5961410	21																			vvi-miRn135
vvi_miC584-5p	CTAAATAAATGAGTAATAGACAACGAAACAACCAGATCACAAGAAAACAAAGAAATCAACATAATGAAAAATAATTTTGCTAGTACAGATATACAGCAAAATTATTTTTCATTATGTTGATTTTTTTGTTTTCTT	CAAAGAAATCAACATAATGAA	chr5: 22564482 22564502	21	vvi_miC584-3p	CATTATGTTGATTTTTTTGTT	chr5: 22564544 22564564	21																			vvi-miRn136
vvi_miC585-5p	CAACAACAATCTAAATGAAACATAGATCTTAATAAAACATACTTCTCCAGCAACAAAATTAAATGAAGTATATTTCTATCATGGTAGATAGTTTGTTAATAA	CAACAATCTAAATGAAACATAGA	chr13: 15492962 15492940	23	vvi_miC585-3p	TATCATGGTAGATAGTTTGTT	chr13: 15492889 15492869	21																			vvi-miRn137
vvi_miC586-5p	AAGAGCCTCGACCTCGGACCTTCATGGGGGGGCTGAGCTGTTGTGGAGCCTCAGCCTTGGACCTTTGTGGGGGCTGACCTGTTGAAGAGCCTCA	CCTCGACCTCGGACCTTCATG	chr1: 2961601 2961581	21	vvi_miC586-3p	GGGGGCTGACCTGTTGAAGAG	chr1: 2961538 2961518	21																			vvi-miRn139
vvi_miC587-5p	TTGATCGAACAAGTCAGCAATGAGCGGAATAGGATACTTGTTATTTACCGTCACCTTGTTGAGTGCCCGGTAGTCT	CGAACAAGTCAGCAATGAGCGG	chr2: 5875068 5875089	22	vvi_miC587-3p	TCACCTTGTTGAGTGCCCGGT	chr2: 5875113 5875133	21																			vvi-miRn140
vvi_miC588-5p	GAGAGCTTGATGTTTGATTTTTTATTTCGTTCTTTTGTTGTATATGAGAATAATTTGATTCCCTTTTAACTGCATTTTGTCATATGATGTTATTTTTTTTTTCTCGTCGTCACGAGAAAAAGAAAATAACATCCTATGACAAAATAGAGTTAAAAGGAAATCAAATTGTTCTCATAGACAACAAAAGAAATGAGAAATAAAAAACCAAACATCAAGCTCTTCA	CTTGATGTTTGATTTTTTATT	chr12: 20918853 20918833	21	vvi_miC588-3p	TAAAAAACCAAACATCAAGCT	chr12: 20918661 20918641	21																			vvi-miRn142
vvi_miC589-5p	TGCTACTTTTTAGCATTAGGTAAAGAAATTTTCAAATTTTATTTTGTTAAAGAGTGCAAATGA	CTTTTTAGCATTAGGTAAAGA	chr9: 10397145 10397125	21	vvi_miC589-3p	TTTTATTTTGTTAAAGAGTGC	chr9: 10397114 10397094	21																			vvi-miRn143
vvi_miC590-5p	TTTCATCAAGGAAGGATGCCGATAGAGAAGAAGAGGAACCAAGTTCCAAAATTTGTTTCCTCTTTTTTTCTATCGTCATCCTTCCTTGATGGG	GGAAGGATGCCGATAGAGA	chr6: 1348665 1348683	19	vvi_miC590-3p	TTCTATCGTCATCCTTCCTTG	chr6: 1348723 1348743	21																			vvi-miRn144
vvi_miC591-5p	TCTGATGATTCGGTCTGCAATGATGTGTTCCACCTCCTTGTCATAGGAGGTCACAATCGCTGTAGGTGCCCTCTTAGAAAGCCCT	TCTGATGATTCGGTCTGCAATGAT	chr6: 15049473 15049450	24	vvi_miC591-3p	CGCTGTAGGTGCCCTCTTAGAAA	chr6: 15049416 15049394	23																			vvi-miRn145
vvi_miC592-5p	GACATTGAGGTTATGACCTGGGAGGAATTTGAGATAATCTTCCTAGGTAAGTATTTTGGAGAGGTGGCTAAG	TGAGGTTATGACCTGGGAGGA	chr13: 10264479 10264459	21	vvi_miC592-3p	TTCCTAGGTAAGTATTTTGGA	chr13: 10264445 10264425	21																			vvi-miRn146
vvi_miC593-5p	TTTAATGGTGAACCAAATAACTCTGGTTATGTTGGTCCATATGTCACAATCATATAGAGAGCATCATAACCAGAGTTCTTTAGTTGACGATTCAGAA	TGGTGAACCAAATAACTCTGG	chrUn: 26025545 26025525	21	vvi_miC593-3p	AGAGTTCTTTAGTTGACGATT	chrUn: 26025479 26025459	21																			vvi-miRn147
vvi_miC594-5p	CCCTCTTAGACAACCCTCGTCTTGGATTATCCTTGTCTTCGTGATAGGGTTTCAAGTAGCTTA	TTAGACAACCCTCGTCTTGGA	chr14: 14659215 14659195	21	vvi_miC594-3p	TTCGTGATAGGGTTTCAAGTA	chr14: 14659183 14659163	21																			vvi-miRn148
vvi_miC595-5p	TCTTCTTGGGGCTGACTCGTCATGGACGCTAGCTCCGCTTTGCGGCTTAGGGCGTCAGCCACATGATTAGCACTTCCTGGCTTAT	TTGGGGCTGACTCGTCATGGA	chr11: 16980656 16980636	21	vvi_miC595-3p	CATGATTAGCACTTCCTGGCT	chr11: 16980600 16980580	21																			vvi-miRn149
vvi_miC596-5p	CCGCTTTTTTCATGGTCTGATTGAGCTGAAATTTGGAGGAGAGGTTTATAAGTCATTAATATTAAATTTGAACGGTGAAGATCGGATTTAGAGTTTTGGAAAGTCAT	TTTTTCATGGTCTGATTGAGC	chr14: 13324833 13324853	21	vvi_miC596-3p	AGATCGGATTTAGAGTTTTGGAAA	chr14: 13324906 13324929	24																			vvi-miRn150
vvi_miC999-3p	CCAATAACAAGAAAGCATGTGTGGGACATAATAGAGAATGCAAATAAAGGGTTGCTATTGAGTGTGATATTAGGACAATGACATACTTTTTTTTTGCATTGTCTATTATGTCCCACACATGCCTCCTTGTTATTG	ATTATGTCCCACACATGCCTC	chr18: 27417445 27417465	21					Same sequence of vvi-miR3635-3p, different locus										vvi-miRC3635a
vvi_miC1000a-5p	TATAATTGCTTGACAACGAGAGAGAGCATGCTTGTCAGCATTCATGTGAGGAACATGACTGTTTACAGACGTGCTCTCTATCGCTATCATACAATCTTC	TGACAACGAGAGAGAGCATGC	chrUn: 10256726 10256706	21					Sequence similar to known vvi-miR535 and vvi-miR156h										vvi-miRC535d
vvi_miC1000b-5p	TATAATTGCTTGACAACGAGAGAGAGCATGCTTGTCAGCATTCATGTGAGGAACATGACTGTTTACAGGCGTGCTCTCTATCGCTATCATACAATCTTC	TGACAACGAGAGAGAGCATGC	chrUn: 10277285 10277265	21					Sequence similar to known vvi-miR535 and vvi-miR156h										vvi-miRC535e
vvi_miC1000c-3p	TTGCTGAAAACAATTTTGCAGGCTTTGGACAGCTTATTGCATTTTGAGGGTCTAAAGCATCTTTATGTTATAGTCCATCACCTTGGCGAGCAAACCATGGTTATCAGAAAATTTTCAGTTTAATATTTGTTTGCTACCATATTTCTTAGTGTGTTTCCTGTTCTGCAGATGTTTAATTC AACTTTGACATATAATTGCTTGACAACGAGAGAGAGCATGCTTGTCAGCAT	TGACAACGAGAGAGAGCATGC	chrUn: 11738997 11739017	21					Sequence similar to known vvi-miR535 and vvi-miR156h										vvi-miRC535h
vvi_miC1000d-3p	TTGCTGGCTTTGGACAGCTTATTGCATTTTTAGGTTCTAAAGCATCTTTATGTTATAGTCCATCACCTTGGCGAGCAAACCATGGTTATCAGAAAATTTTCAGTTTAATATTTGTTTGCTACCATATTTCTTAGTGTGTTTCCTTGTTCTGCTGATGTTTAATTCAACTTTGACATATAA TTGCTTGACAACGAGAGAGAGCATGCTTGTCAGCAT	TGACAACGAGAGAGAGCATGC	chrUn: 11799237 11799257	21					Sequence similar to known vvi-miR535 and vvi-miR156h										vvi-miRC535i
vvi_miC1000e-5p	TATAATTGCTTGACAACGAGAGAGAGCATGCTTGTCAGCATTCATGTGAGGAACATGACTGTTTACAGGCGTGCTCTCTATCGCTATCATGCAATCTTC	TGACAACGAGAGAGAGCATGC	chrUn: 37661124 37661104	21					Sequence similar to known vvi-miR535 and vvi-miR156h										vvi-miRC535k
vvi_miC1001-5p	GAAGATTGTATGACAGCGAGAGAGAGCACGCCTGTACACAGTCATGTTCCTCGCATGAATGCTGACTAGCGTGCTCTCTCTCGTTGTCAAGCAATTACA	TGACAGCGAGAGAGAGCACGC	chr7_random: 1392265 1392285	21					Sequence similar to known vvi-miR535a									novel_mir_31
vvi_miC1002a-5p	TGCAATTGCTTGACAAAGAGAGAGAGCACACTTGTTAGCATTCATGTGAGGTAACATGACTGTGTACAGGTGTGCTTTCTCTCGCTGTCATACAATCTTCTCATCAAGGATGCC	TGACAAAGAGAGAGAGCACAC	chr7_random: 1422373 1422353	21					Sequence similar to known vvi-miR535							miR114a		novel_mir_32
vvi_miC1002b-5p	TGCAATTGCTTGACAAAGAGAGAGAGCACACTTGTTAGCATTCATGTGAGGTAACATGACTGTGTACTGGTGTGCTCTCTCTCGCTGTCATACAATCTTCTCATCAAGGATGCC	TGACAAAGAGAGAGAGCACAC	chrUn: 10282050 10282030	21	vvi_miC1002b-3p	GTGCTCTCTCTCGCTGTCATA	chrUn: 10281989 10281969	21	Sequence similar to known vvi-miR535							miR114b			vvi-miRC535f
vvi_miC1002c-5p	TGCAATTGCTTGACAAAGAGAGAGAGCACACTTGTTAGCATTCATGTGAGGTAACATGACTGTGTACTGGTGTGCTCTCTCTCGCTGTCATACAATCTTCTCATCAAGGATGCC / AGATGTTTCGTTCAAGCTTTGACATGCAATTGCTTGACAAAGAGAGAGAGCACACTTGTTAGCATTCATGTGAGGTAACATGACTGTGTACTGGTGTGCTCTCTCTCGCTGTCATACAATCTTCTCATCAAGGATGCCTTACATTT	TGACAAAGAGAGAGAGCACAC	chrUn: 11733978 11733998	21	vvi_miC1002c-3p	GTGCTCTCTCTCGCTGTCATA	chrUn: 11734039 11734059	21	Sequence similar to known vvi-miR535							miR114c			vvi-miRC535g				n_107*
vvi_miC1002d-5p	TGCAATTGCTTGACAAAGAGAGAGAGCACACTTGTTAGCATTCATGTGAGGTAACATGACTATGTACAGGTGTGCTTTCTCTCGCTGTCATACAATCTTCTCATCAAGGATGCC	TGACAAAGAGAGAGAGCACAC	chrUn: 11820805 11820825	21					Sequence similar to known vvi-miR535							miR114d			vvi-miRC535j
vvi_miC1002d-V1-5p	CTTTGACATGCAATTGCTTGACAAAGAGAGAGAGCACACTTGTTAGCATTCATGTGAGGTAACATGACTGTGTACAGGTGTGCTTTCTCTCGCTGTCATACAATCTTCTCATCAAGG	TTGACAAAGAGAGAGAGCACA	chrUn: 11820804 11820824	21					Sequence similar to known vvi-miR535														n_327
vvi_miC1002e	The authors do not report the precursor	TGACAAAGAGAGAGAGCACAC		21					Sequence similar to known vvi-miR535							miR114e
vvi_miC1002f	The authors do not report the precursor	TGACAAAGAGAGAGAGCACAC		21					Sequence similar to known vvi-miR535							miR114f
vvi_miC1002g	The authors do not report the precursor	TGACAAAGAGAGAGAGCACAC		21					Sequence similar to known vvi-miR535							miR114g
vvi_miC1003_V1-3p	GTGTCCATCAAGACCTGCAGGAGAAGAGAGAGAGTACAGCTATACTTGCTCCCCGTAATGGAGCAATGGAAGCTGTACCCTCTCTCTTCCCCCGTTTATCTTTGATGATAT	GAAGAGAGAGAGTACAGCTAT	chr5: 19124499 19124479	21	vvi_miC1003_V1-5p	GCTGTACCCTCTCTCTTCCCC	chr5: 19124450 19124430	21	Variants of vvi_miC1003 in the same locus. vvi_miC1003-3p partially complementary to known vvi-miR156h																		vvi-miRn010.2
vvi_miC1003-3p	GGGAAGCTTCAAGTTGCACTCTTTAGTCTTCATCTCATTGAATTATTAAACATGTCGTTTGGTGAGTAGTGGCCTGGCCCAAAAAGTTAAGACTCCCAAGAAGAACATGGGTACTTCAATAGCTTTATCAATTACCCACCAAGAGAAAGAAAACCTCTCTACTTATTTATAGACCAGAGAAGGAAAGGCATTTGCATGTTCATGCTGGTGTCCATCAAGACCTGCAGGAGAAGAGAGAGAGTACAGCTATACTTGCTCC / GTGTCCATCAAGACCTGCAGGAGAAGAGAGAGAGTACAGCTATACTTGCTCCCCGTAATGGAGCAATGGAAGCTGTACCCTCTCTCTTCCCCCGTTTATCTTTGATGATAT	AGAAGAGAGAGAGTACAGCTA	chr5: 19124500 19124480	21	vvi_miC1003-5p	AGCTGTACCCTCTCTCTTCCC	chr5: 19124451 19124431	21	vvi_miC1003-3p partially complementary to known vvi-miR156h			VV-MIR012	va-miR088		VITIS-MIR13	miR089 / miR020	Vvi-miRC67	novel_mir_20	vvi-miRC529							Vvi-miRC67	vvi-miRn010.1
vvi_miC1004a-3p	TGGGGGTTGAACAAGCTGCCCTCATTCCAAATTCAAAAGAGTAGAAGGTGTTACATCTGCTGGTTCATGGATACCTTTGTAGTGTACAGATTAATATATCCAATGTCCCCTTTAAGGGTTTGCATGAATGGGGAGATGAGGTTTCCTTCTTGACTTGTAATTTGGTTTGAAGGGAGCTCTGATGACCCTT	TTTGGTTTGAAGGGAGCTCT	chr15: 18461479 18461460	20					Sequence similar to known vvi-miR159 and vvi-miR319e										vvi-miRC159d
vvi_miC1004b-3p	TGGGGGATTGAACAAGCTGCCTTCATCCCAAAATCAAAAGAGTAGAAGGTGTTACATCTGCTGGTTCATGGATACCTTTGTAGTGTACAGATTAATATATCTAATGTCCACTTTAAGGGTTTGCATGAATGGGGAGATGAGGTTGCCTTCTTCACTTATAATTTGGTTTGAAGGGAGCTCTGATAGCCCTT	TTTGGTTTGAAGGGAGCTCT	chr15: 18466327 18466308	20					Sequence similar to known vvi-miR159 and vvi-miR319e										vvi-miRC159e
vvi_miC1005-3p	GGTGGGGTTCAATGGAGCTCTCTTTGCTCCTAGCTAGAAGGAGATGAGGGTATGCCACAGCTGCCAGTTCATGAATGCCCATGGATGCTCAAGTTCTAGCATATGGTGAGAGCAAGCTATGGGTGAGCATGACTTGGGAGATGAGGGTACTTTGATCTTTCTGGTATTGGAGTGAAGGGAGCTCTATGGTTCTTAC	TTGGAGTGAAGGGAGCTCTA	chr15: 18473316 18473297	20					Sequence similar to known vvi-miR159										vvi-miRC159f
vvi_miC1006-5p	The authors do not report the precursor	TGCCTGGCTCCCTGAATGCCA	chr10: 1222389 1222409	21	vvi_miC1006-3p	GCATGAGGGGAGTCAAGCAGG	chr10: 1222452 1222472	21	Variant of vvi-miR160b in the same locus						VITIS-MIR47*
vvi_miC1007-3p	CGAGTGTTGAGCAAGATGGAGAAGCAGGGCACGTGCATTACTAGCTCATGCACCACAAACCAATAATCTTTTGCTCGAGTTAGACTCTTGCTTGCTGCTTTGATTTTTTTTGTTAGCACCAGCGAGAGTTGGTTCTTCATGTGCCCCTCTTCCCCATCATGACCACTCT	CATGTGCCCCTCTTCCCCATC	chr8: 10080591 10080611	21					Sequence similar to known vvi-miR164c				va-miR071			miR028 / miR093
vvi_miC1008a-5p	GAACCCATGTTGGAGAAGGGGAGCACGTGCAGAGCAGATTAGAATTTGTGAACTGCACGTGCAGAGCAGATTAGAATTTGTGAACTGCACGTGCCCTGCTTCTCCATCAAGAGCTTCA	TGGAGAAGGGGAGCACGTGCA	chr14: 1414577 1414597	21					Sequence in the same locus and complementary to known vvi-miR164d*			VV-MIR068a	va-miR029-1			miR026 / miR091		novel_mir_53
vvi_miC1008b-5p	GAACCCATGTTGGAGAAGGGGAGCACGTGCAAGCCTGTGGGCGGTGGTGGGAGTAAAGAAGAAAAAAGGGGGAAAAGTGAGGCAAATCTGCACGTGCCCTGCTTCTCCAACAAGGAGCT	TGGAGAAGGGGAGCACGTGCA	chr7: 3287482 3287502	21					Sequence in the same locus and complementary to known vvi-miR164a*			VV-MIR068b	va-miR029-2			miR026 / miR091
vvi_miC1009-5p	The authors do not report the precursor	AGCCAAGGATGACTTGCCGACT	chr8: 21104464 21104485	22	vvi_miC1009-3p	CCGGCAAGTTGTCTTTGGCTAC	chr8: 21104537 21104558	22	vvi_miC1009-5p variant of vvi-miR169g in the same locus						VITIS-MIR16*
vvi_miC1010-3p	CGCCTTGTGTGGTAGCCAAGGATGACTTGCCTGCTCCTCCCGAGTGGTTCGTGGGGATATAGATTATAGACCCCTGTGTGGTCCTCAGGCAGTCACCTTGGCTAACTTGACAGGCA	AGGCAGTCACCTTGGCTAAC	chr14: 25082529 25082510	20	vvi_miC1010-5p	AGCCAAGGATGACTTGCCTGC	chr14: 25082602 25082582	21	vvi_miC1010-5p squence similar to known vvi-miR169e, x									novel_mir_58
vvi_miC1011-5p	TGCATTAAGATGTAGGGAGTAGAATGCAGCCAAGGATGACTTGCCGGAGATGGGGCATTCCTCGTTAATCCGGCAAGTTGTCCTTGGCTACATTGGGCTCTCTTCTTCTCATGTAA	TGTAGGGAGTAGAATGCAGC	chr4: 2266018 2265999	20	vvi_miC1011-3p	TACATTGGGCTCTCTTCTTC	chr4: 2265940 2265921	20	vvi_miC1011-5p sequence partially overlapping with known vvi-miR169c										grape-m7218
vvi_miC1012-5p	TCTTGTCTGATAGCCAAGGATGACTTGCCTGCCCTATCCCAAGTGGGTCAATTTCTTTCTTTTTTCCAAGTAGTGTTTGATATTTGATATATCATGAATCCGGTTGTTTGGGTTCCAGGCAGTCACCTTGGCTAATTTTACAGGC	TAGCCAAGGATGACTTGCCT	chr14: 25082854 25082835	20					Variant of vvi-miR169e in the same locus												vvi-miRC169z
vvi_miC1012b_V1-5p	GAATTTGAGAGGAAGAGAGGTATAACATGAAGATAAGCGCCTTGTGTGGTAGCCAAGGATGACTTGCCTGCTCCTCCCGAGTGGTTCGTGGGGATATAGATTATAGACCCCTGTGTGGTCCTCAGGCAGTCACCTTGGCTAACTTGACAGGCACTTCTCTTTCATGCTAGGCCTTCTCTTCTTCACCAATATTC	TAGCCAAGGATGACTTGCCTG	chr14: 25082603 25082583	21	vvi_miC1012b_V1-3p	GGCAGTCACCTTGGCTAACT	chr14: 25082528 25082509	20	Variant of vvi-miR169e																		vvi-miRn008.2
vvi_miC1012b-5p	GAATTTGAGAGGAAGAGAGGTATAACATGAAGATAAGCGCCTTGTGTGGTAGCCAAGGATGACTTGCCTGCTCCTCCCGAGTGGTTCGTGGGGATATAGATTATAGACCCCTGTGTGGTCCTCAGGCAGTCACCTTGGCTAACTTGACAGGCACTTCTCTTTCATGCTAGGCCTTCTCTTCTTCACCAATATTC	TAGCCAAGGATGACTTGCCTGC	chr14: 25082603 25082582	22	vvi_miC1012b-3p	AGGCAGTCACCTTGGCTAACT	chr14: 25082529 25082509	21	Variant of vvi-miR169e																		vvi-miRn008.1
vvi_miC1013a-3p	CAACCGTGACGAGGAGTTGAAATAGTTACTGTGATGTTGGCTCGGTTCACTCAGACAAAAAGAAAAAAAGAAAAAACAAACACATATATGCATGCATTTTTCTCTTTTAGCTTTGATTGAGCCGTGCCAATATCTCAGTGCCTTTTCATTTCTACTCATTTG / AGTTACTGTGATGTTGGCTCGGTTCACTCAGACAAAAAGAAAAAAAGAAAAAACAAACACATATATGCATGCATTTTTCTCTTTTAGCTTTGATTGAGCCGTGCCAATATCTCAGTGCCT	TGATTGAGCCGTGCCAATATC	chr18: 1502398 1502418	21	vvi_miC1013a-5p	TGTTGGCTCGGTTCACTCAGA	chr18: 1502319 1502339	21	vvi_miC1013a-3p same sequence of vvi-miR171a, c, d, i, j, different loci			VV-MIR071*							vvi-miRC171j		vvi-miRC171j						vvi-miRn025b
vvi_miC1013b-3p	ATGAAATGGCTGCTGCGATATTGGCCCGGTTCACTCAGATACAGGATACACCTACACTTCCAAAGAAAAAAAAAAAGGTGTACTTTTGATTTGATTGAGCCGTGCCAATATCTGAGTTCCCTTTCAT / GATATTGGCCCGGTTCACTCAGATACAGGATACACCTACACTTCCAAAGAAAAAAAAAAAGGTGTACTTTTGATTTGATTGAGCCGTGCCAATATC	TGATTGAGCCGTGCCAATATC	chrUn: 19112270 19112290	21	vvi_miC1013b-5p	TATTGGCCCGGTTCACTCAGA	chrUn: 19112197 19112217	21	vvi_miC1013b-3p same sequence of vvi-miR171a, c, d, i, j, different loci						VITIS-MIR52*				vvi-miRC171h		vvi-miRC171n						vvi-miRn025a
vvi_miC1014-3p	CAACTGCATGAAATGGCTGCTGCGATATTGGCCCGGTTCACTCAGATACAGGATACACCTACACTTCCAAAGAAAAAAAAAAAGGTGTACTTTTGATTTGATTGAGCCGTGCCAATATCTGAGTTCCCTTTCATTTCTACCATT	TTGATTTGATTGAGCCGTGCC	chrUn: 19112264 19112284	21					Variant of vvi-miR171a, c, d, i, j										vvi-miRC171h.1
vvi_miC1015-3p	GAGGTTGCAGTGACCGAGAGAGTGTTCAAATATGGGGGGAGGTATTGGCGTGCCTCAATTTAAAGACATGGTTAGATGAAGAGATATTAGCCATGTGATTTGATTGAGCCGCGTCAATATCTCCTTTTGCACCT	TTGAGCCGCGTCAATATCTCC	chr12: 5542426 5542406	21					Variant of vvi-miR171b in the same locus												vvi-miRC171k
vvi_miC1016a-5p	GTTTGCGCATGTAGCATCATCAAGATTCACATGCAAATGCACGGTGGTGATGTTATCTCTGCCAAACTTTTCAAGGATGAGAATCTTGATGATGCTGCATCGGCAATA	GTAGCATCATCAAGATTCACA	chr6: 17652509 17652489	21	vvi_miC1016a-3p	TGAGAATCTTGATGATGCTGC	chr6: 17652442 17652422	21	Sequence in the same locus and complementary to known vvi-miR172a				va-miR058			miR107	Vvi-miRC86		vvi-miRC172f		vvi-miRC172g
vvi_miC1016b-5p	GTTTGCAGGTGTAGCATCATCAAGATTCACATGCGAAAGCCCGGCGCGGCAGCGATGCCATCTTCGCTGCCTCAAGTTTTGGGGTTGAGAATCTTGATGATGCTGCATCGGCAATA	GTAGCATCATCAAGATTCACA	chr13: 6181475 6181455	21	vvi_miC1016b-3p	TGAGAATCTTGATGATGCTGC	chr13: 6181400 6181380	21	Sequence in the same locus and complementary to known vvi-miR172b										vvi-miRC172e		vvi-miRC172e
vvi_miC1017-5p	GGATAATCTCAAGGCCACGGTCAGTGTTTGCGGATGCAGCATCATGAAGATTCACAATCTCCAAAAGCTTTTTTTGAGTGGGGGTGGTATATGAGGTCCCCTTTACTCGAAAGGCTCCTTTCATATGGGAATCTTGATGATGCTGCATCAGCAGATATATGGCTACTCTTTCCTTTCGATTTCC / GTTTGCGGATGCAGCATCATGAAGATTCACAATCTCCAAAAGCTTTTTTTGAGTGGGGGTGGTATATGAGGTCCCCTTTACTCGAAAGGCTCCTTTCATATGGGAATCTTGATGATGCTGCATCAGCAGATA	GCAGCATCATGAAGATTCACA	chr6: 6003617 6003637	21	vvi_miC1017-3p	GGAATCTTGATGATGCTGCAT	chr6: 6003709 6003729	21	vvi_miC1017-5p similar to known vvi-miR172d. vvi_miC1017-3p similar to known vvi-miR172c, d			VV-MIR038	va-miR059*			miR071	Vvi-miRC84									Vvi-miRC77	vvi-miRn081
vvi_miC1018-3p	TCGTTAGCTGATGCAGCATCATCAAGATTCACACCCAATGGAAGGGCAGTGATGCAATCTCTGCCAAAGATTTTGAGATGAGAATCTTGATGATGCTGCATTCGCAGTGAACGAC	TGAATCTTGATGATGCTGCAT	chr8: 12667201 12667181	21					Sequence in the same locus and complementary to known vvi-miR172d*			VV-MIR061				miR029
vvi_miC1019-3p	ATGCAGCATCATCAAGATTCACACCCAATGGAAGGGCAGTGATGCAATCTCTGCCAAAGATTTTGAGATGAGAATCTTGATGATGCTGCATTCGCAGTGAACGACT	TGAGAATCTTGATGATGCTGC	chr8: 12667249 12667269	21	vvi_miC1019-5p	AGCATCATCAAGATTCACACC	chr8: 12667185 12667205	21	Variant of vvi-miR172d in the same locus																c147760
vvi_miC1022-3p	AGTATGGGAGAATCTGTTAAGCTCAGGAGGGATAGCGCCACTACGCTTAAACCATTTTTATTTTTTTTGGAAATGGGTTTTTTTGGTTGTTGGTTGCGCTATCCATCCTGAGTTTCATTGGTTCTTCTTGCT / AGCTCAGGAGGGATAGCGCCACTACGCTTAAACCATTTTTATTTTTTTTGGAAATGGGTTTTTTTGGTTGTTGGTTGCGCTATCCATCCTGAGTT	CGCTATCCATCCTGAGTTTCA	chr8: 9571500 9571520	21	vvi_miC1022-5p	AAGCTCAGGAGGGATAGCGCC	chr8: 9571422 9571442	21	vvi_miC1022-5p same sequence of known vvi-miR390			VV-MIR035	va-miR068			miR027			vvi-miRC390a		vvi-miRC390a						vvi-miRn037
vvi_miC1023-5p	AGTATGGGAGAATCTGTTAAGCTCAGGAGGGATAGCGCCATGAGCCATGATGAAAATGATTGTTGAGTTGAAAATTTTTTCTAGCTTGTTTTTTGGGTCATCATTTTGTGTGTGTGGCGCTATCTATCCTGAGTTTCACGGGTTCTTCTTACT	TAAGCTCAGGAGGGATAGCGC	chr6: 8159528 8159548	21	vvi_miC1023-3p	CGCTATCTATCCTGAGTTTCA	chr6: 8159628 8159648	21	vvi_miC1023-5p variant of vvi-miR390 in the same locus						VITIS-MIR22*								n_532*
vvi_miC1024-5p	TAAGGTACAATGCAATGGGACCACATTAGAGATACAGAGTAATGAGATCAAATTCTAGGTTGAATATTGACACAAAAGGTAGGTGTGTGGACCCCGCATTTTCGCTCAATGCGTTCCCACTCGATTGCGAAACTTGTTTTTTTATTTATTT	TCGAGTGGGAACGCATTGAGC	chr9: 9809318 9809298	21					Sequence similar to known vvi-miR393				va-miR045
vvi_miC1025-5p	The authors do not report the precursor	CAACTGGAGGAGGCATCCAAA	chr13: 4265127 4265147	21	vvi_miC1025-3p	TGGATTCCTCCTTTGGTAGCT	chr13: 4265199 4265219	21	vvi_miC1025-5p sequence partially overlapping with known vvi-miR393b							miR034
vvi_miC1026_V1-3p	TGACCCAAATTTTTCCACATCTTTCTTGAACTTGGAAGCATGGATCCATGGTCTTTTGCAGAAGACAATCTGCAATTAGGCTCAAGAAAGCTGTGGGAAAACATGGGTTG	GCTCAAGAAAGCTGTGGGAAA	chr12: 5155990 5155970	21	vvi_miC1026_V1-5p	TTCCACATCTTTCTTGAACTT	chr12: 5156057 5156037	21	Variants of vvi_miC1026-3p and vvi_miC1026-5p in the same locus. vvi_miC1026_V1-5p sequence similar to known vvi_miR396			VV-MIR039
vvi_miC1026-3p	GTTGACCCAAATTTTTCCACATCTTTCTTGAACTTGGAAGCATGGATCCATGGTCTTTTGCAGAAGACAATCTGCAATTAGGCTCAAGAAAGCTGTGGGAAAACATGGGTTGA	CTCAAGAAAGCTGTGGGAAAA	chr12: 5155989 5155969	21	vvi_miC1026-5p	TTTCCACATCTTTCTTGAACT	chr12: 5156058 5156038	21	vvi_miC1026-5p sequence similar to known vvi_miR396				va-miR009*			miR046 / miR077	Vvi-miRC07									Vvi-miRC07
vvi_miC1027_V1-5p	GAAAGGTCGTTTGCATGCTTTTCCACGGCTTTCTTGAACTTGGAACTTAGGTGTGCTTCTCTCTCTTCTTCTTCTTCTTCTCCTTTCTCTCTACATCCATACGTATGTTTCTCTTCAGAGAATACTCTTAATATGAAATTAAATCTTAGTACGAAGTTCAAGAAAGCCGTGGGAAAATATGAAATGATTTTGTTGTT / AAGGTCGTTTGCATGCTTTTCCACGGCTTTCTTGAACTTGGAACTTAGGTGTGCTTCTCTCTCTTCTTCTTCTTCTTCTCCTTTCTCTCTACATCCATACGTATGTTTCTCTTCAGAGAATACTCTTAATATGAAATTAAATCTTAGTACGAAGTTCAAGAAAGCCGTGGGAAAATATGAAATGATTTT	TTCCACGGCTTTCTTGAACTT	chr1: 1997823 1997843	21	vvi_miC1027-3p	TTCAAGAAAGCCGTGGGAAAA	chr1: 1997959 1997979	21	Variant of vvi_miC1027-5p in the same locus. vvi_miC1027_V1-5p sequence similar to known vvi-miR396a, b, c, d.									novel_mir_42	vvi-miRC396e		vvi-miRC396e
vvi_miC1027-5p	GTCGTTTGCATGCTTTTCCACGGCTTTCTTGAACTTGGAACTTAGGTGTGCTTCTCTCTCTTCTTCTTCTTCTTCTCCTTTCTCTCTACATCCATACGTATGTTTCTCTTCAGAGAATACTCTTAATATGAAATTAAATCTTAGTACGAAGTTCAAGAAAGCCGTGGGAAAATATGAAATGA	TTTCCACGGCTTTCTTGAACT	chr1: 1997822 1997842	21	vvi_miC1027-3p	TTCAAGAAAGCCGTGGGAAAA	chr1: 1997959 1997979	21	vvi_miC1027-5p sequence similar to known vvi-miR396a, b, c, d.			VV-MIR075	va-miR008					novel_mir_4
vvi_miC1028-3p	TTTCTGGGCATTGGTGGTGACTCTGTGTTCCGATGCCTGTTTTGATACCACCATTGGTTTGCATAAATTTGATTTCAAAATTTCTTTTGCTAATACTAACCAATGGTGTTCTCAGGACATGCCTTATGT	ACCAATGGTGTTCTCAGGACA	chr18: 4447564 4447584	21					Sequence similar to known vvi-miR398a										grape-m3618
vvi_miC1030-3p	TGCATGGATGCATTACTGGGCAATTACTCCATTGGCAGTTGGCCACTCGGCTGACCGTGATTAACTTCACAAGTTCCAGAGTAAGCTCACTGCCAAAGGAGATTTGCCCCGCAACTCATCTGTGCA	TGCCAAAGGAGATTTGCCCCG	chr10: 2978929 2978909	21	vvi_miC1030-5p	GGGCAATTACTCCATTGGCAGT	chr10: 2979002 2979981	22	Sequence similar to known vvi-miR399g										vvi-miRC399j								vvi-miRn131
vvi_miC1031-5p	TAGACACCCATTAGATTCACGCACAAACTCCTTTACTAATTTATGCATAGGAAAGGAGGTTGTTGTTGAAGCTGCTACAGGCCTTTTC	TTAGATTCACGCACAAACTC	chr10: 15150969 15150950	20					Sequence similar to known vvi-miR403												vvi-miRC403g
vvi_miC1032a-3p	AGACAGATCCCGAGTTTGTGCGTGAATCTAACACCCCTTTGAAAGAAGATTGAGGGGTTGGATTCGCGCACAAACTCGAGGTTTGTAT	TTGGATTCGCGCACAAACTCG	chr5: 166510 166490	21					Sequence in the same locus and complementary to known vvi-miR403d*								Vvi-miRC64									Vvi-miRC64
vvi_miC1032b-3p	AGACAGATCCCGAGTTTGTGCGTGAATCTAACACCCCTTTGAAAGAAGATCGAGGCGTTGGATTCGCGCACAAACTCGAGGTTTGTAT	TTGGATTCGCGCACAAACTCG	chr5: 600209 600189	21					Sequence in the same locus and complementary to known vvi-miR403b*								Vvi-miRC65									Vvi-miRC65
vvi_miC1036-3p	GGCAAGTGGGAAAGAGGGTAGAAGCTCTTGAGGGGGACTGAAGAAGCTGTGCTTTGCTTGGGAGGGATGATATATATCAATGTAGCCAACACGAGGCATTTCTATTGCTCACTCTTTCTCAAGGGCTTCTAGCATTGCCAGTAACAAAATGG	ACTCTTTCTCAAGGGCTTCTAG	chr2: 1237715 1237736	22	vvi_miC1036-5p	GAAGCTCTTGAGGGGGACTG	chr2: 1237625 1237644	20	vvi_miC1036-3p same sequence of miR477b-3p in the same locus, different precursor.			VV-MIR037*
vvi_miC1037-3p	TTTCAAGGCATTGGTTGCTCACTCTCCCTCAAGGGCTTCTGCACTTTGGCCATGGCCATATACCAATGTGGGGCAAGTGGGAAAGAGGGTAGAAGCTCTTGAGGGGGACTGAAGAAGCTGTGCTTTGCTTG	GAAGCTCTTGAGGGGGACTG	chr2: 1237625 1237644	20	vvi_miC1037-5p	ACTCTCCCTCAAGGGCTTCTG	chr2: 1237554 1237574	22	vvi_miC1037-5p sequence similar to known vvi-miR477.								Vvi-miRC56	novel_mir_10								Vvi-miRC56
vvi_miC1037-3p	The authors do not report the precursor	GAAGCTCTTGAGGGGGACTG	chr2: 1237625 1237644	20	vvi_miC1037_V1-5p	CTCTCCCTCAAGGGCTTCTG	chr2: 1237555 1237574	20	Variant of vvi_miC1037-5p in the same locus. vvi_miC1037_V1-5p sequence similar to known vvi-miR477.							miR056
vvi_miC1038a-5p	TCCCTCAAAGGCTTCCAATTTTCCTGGCTAATTATCAAGGTAAGAAAGTTGGAAGCCGGTGGGGGA / TAGAGAGTAAATAGGGAAGTTGTCAACCTCCCTCAAAGGCTTCCAATTTTCCTGGCTAATTATCAAGGTAAGAAAGTTGGAAGCCGGTGGGGGACCTTGAAAGCTTACCCCAGAATCAATATTACTCATCTG	TCCCTCAAAGGCTTCCAATTT	chr19: 12889988 12880008	21	vvi_miC1038a-3p	GTTGGAAGCCGGTGGGGGACC	chr19: 12890035 12890055	21	Sequence similar to known vvi-miR477a				va-miR057-2*		VITIS-MIR11_4*	miR012a* / miR105*	Vvi-miRC43*		vvi-miRC477c /grape-m0657		vvi-miRC477c					Vvi-miRC43*	vvi-miRn021a
vvi_miC1038b-5p	TCCCTCAAAGGCTTCCAATTTTCCTGGCTAATTATCAAGGTAAGAAAGTTGGAAGCCGGTGGGGGA / GGGAAGTTGTCAACCTCCCTCAAAGGCTTCCAATTTTCCTGGCTAATTATCAAGGTAAGAAAGTTGGAAGCCGGTGGGGGACCTTGAAAGCTTAC	TCCCTCAAAGGCTTCCAATTT	chr19: 13141696 13141716	21	vvi_miC1038b-3p	GTTGGAAGCCGGTGGGGGACC	chr19: 13141743 13141763	21	Sequence similar to known vvi-miR477a			VV-MIR045b*			VITIS-MIR11_2*	miR012b* / miR105*	Vvi-miRC44*		vvi-miRC477d		vvi-miRC477l					Vvi-miRC44*	vvi-miRn021b
vvi_miC1038c-5p	TAAGTTGTCAACCTCCCTCAAAGGCTTCCAATTTTCCTGGCTAATTATCAAGGTAAGAAAGTTGGAAGCCGGTGGGGGACCTTGAAAGCTT / TCCCTCAAAGGCTTCCAATTTTCCTGGCTAATTATCAAGGTAAGAAAGTTGGAAGCCGGTGGGGGA	TCCCTCAAAGGCTTCCAATTT	chr19: 13510118 13510138	21	vvi_miC1038c-3p	GTTGGAAGCCGGTGGGGGACC	chr19: 13510165 13510185	21	Sequence similar to known vvi-miR477a			VV-MIR045a*			VITIS-MIR11_3*	miR012c* / miR105*	Vvi-miRC45*		vvi-miRC477e		vvi-miRC477m					Vvi-miRC45*
vvi_miC1038d-5p	TCCCTCAAAGGCTTCCAATTTTCCTGACTGATTATCGAGGTTGGAAAGTTGGAAGCCGGTGGGGGA / GCCTATATAAAGAGCATGGAGGTTTGTAATTTCCAGTATCAGCAACAAAGAGCAGGTGTGAATTGTAGAGAGTAAATGGAGAAGTTGTCAACCTCCCTCAAAGGCTTCCAATTTTCCTGACTGATTATCGAGGTTGGAAAGTTGGAAGCCGGTGGGGGACCTTGAAAGCTTACCCCAGAATCAATATTACTCATCTGGTTATTTGTTTTCAGTTTCCCTGATCATTGGGAAGACAGTACGTAAGATTGATTTGAGGT	TCCCTCAAAGGCTTCCAATTT	chr19: 18881443 18881423	21	vvi_miC1038d-3p	GTTGGAAGCCGGTGGGGGACC	chr19: 18881396 18881376	21	Sequence similar to known vvi-miR477a				va-miR057-1*		VITIS-MIR11_1* / VITIS-MIR11_5*	miR012d* / miR105*	Vvi-miRC50*		vvi-miRC477g		vvi-miRC477p					Vvi-miRC50*	vvi-miRn021e
vvi_miC1038e-5p	TCCCTCAAAGGCTTCCAATTTTCCTGGCTAATTATCAAGGTTAGAAAGTTGGAAGCCGGTGGGGGA / TAGAGAGTAAATAGGGAAGTTGTCAACCTCCCTCAAAGGCTTCCAATTTTCCTGGCTAATTATCAAGGTTAGAAAGTTGGAAGCCGGTGGGGGACCTTGAAAGCTTACCCCAGAATCAATATTACTCATCTG	TCCCTCAAAGGCTTCCAATTT	chrUn: 16673055 16673035	21	vvi_miC1038e-3p	GTTGGAAGCCGGTGGGGGACC	chrUn: 16673008 16672988	21	Sequence similar to known vvi-miR477a										vvi-miRC477h		vvi-miRC477i						vvi-miRn021f
vvi_miC1038f-5p	GTATCAGCAACAAAGAGCAGGTGTGAATTGTAGAGAGTAAATGGGGAAGTTGTCAACCTCCCTCAAAGGCTTCCAATTTTCCTGGCTGATTATCAAGGTTTGGATAGTTGGAAGTCGGTGGGGGACCTTGAAAGCTTACCCCAGAATCAATATTACATCTGGTTATTTGGTAT / TCCCTCAAAGGCTTCCAATTTTCCTGGCTGATTATCAAGGTTTGGATAGTTGGAAGTCGGTGGGGGACC	TCCCTCAAAGGCTTCCAATTT	chr19: 18872799 18872779	21	vvi_miC1038f-3p	GTTGGAAGTCGGTGGGGGACC	chr19: 18872751 18872731	21	Sequence similar to known vvi-miR477a			VV-MIR047*	vamiR106*		VITIS-MIR6	miR040*	Vvi-miRC49*		grape-m4553		vvi-miRC477o			c141224	c74312 / c90389 / c94676 / c92169	Vvi-miRC49*	vvi-miRn021d
vvi_miC1038g_V1-5p	CAAAGAGCAGGTGTGAATTGTAGAGAGTAAATGGGGAAGTTCTCAACCTCCCTCAAAGGCTTCCAATTTTCCTGACTGATTATCAAGATTGGAAAGTTGGAAGTCGGTGGGGGAACTTGAAAGCTTACCCCAGAATCAATATTACTCATCTGGTTATTTG	TCCCTCAAAGGCTTCCAATTC	chr19: 18678363 18678383	21	vvi_miC1038g_V1-3p	GTTGGAAGTCGGTGGGGGAAC	chr19: 18678410 18678430	21	Sequence similar to known vvi-miR477a. In bold nucleotide that differ from the reference genome. Variants of vvi_miC1038g															c141107			vvi-miRn021c
vvi_miC1038g-5p	TCCCTCAAAGGCTTCCAATTTTCCTGACTGATTATCAAGATTGGAAAGTTGGAAGTCGGTGGGGGAAC / AGATTGGAAAGTTGGAAGTCGGTGGGGGAACTTGAAAGCTTACCCCAGAATCAATATTACTCATCTGGTTATTTGGTATCAGTTTCCCTGATCAATGGGAAGACGGTAAGAATATTGATTTAAGGTGAGATGTCCCCTTCTTCTCAAGAGACTCTGCTAACTTTTTAGAGA	TCCCTCAAAGGCTTCCAATTT	chr19: 18678363 18678383	21	vvi_miC1038g-3p	GTTGGAAGTCGGTGGGGGAAC	chr19: 18678410 18678430	21	Sequence similar to known vvi-miR477a			VV-MIR046*				miR013* / miR086*	Vvi-miRC46*	novel_mir_3*	vvi-miRC477f		vvi-miRC477n	vvi-New33*			c74244	Vvi-miRC46*
vvi_miC1038h_V1-5p	TGAGCAACAAAGAGCAGATGTGAATTGTAGAGAGTAAATGGGGAAGTTGTCAACCTCCCTCAAAGGCTTCCAATTTTCCTGGCTGATTATCAAGGTTGGAAAGCTGGAAGCCGATGGGGGACCTTGAAAGCTTACCCCAGAATCAATATTACTCATCTGGTTATTTGGTATCA	TCCCTCAAAGGCTTCCAATT	chr6: 19950822 19950801	20	vvi_miC1038h_V1-3p	CTGGAAGCCGATGGGGGACC	chr6: 19950756 19950775	20	Sequence similar to known vvi-miR477a. Variants of vvi_miC1038h-3p																		vvi-miRn012.2
vvi_miC1038h-5p	CAGATGTGAATTGTAGAGAGTAAATGGGGAAGTTGTCAACCTCCCTCAAAGGCTTCCAATTTTCCTGGCTGATTATCAAGGTTGGAAAGCTGGAAGCCGATGGGGGACCTTGAAAGCTTACCCCAGAATCAATATTACTCATCTG / TGAGCAACAAAGAGCAGATGTGAATTGTAGAGAGTAAATGGGGAAGTTGTCAACCTCCCTCAAAGGCTTCCAATTTTCCTGGCTGATTATCAAGGTTGGAAAGCTGGAAGCCGATGGGGGACCTTGAAAGCTTACCCCAGAATCAATATTACTCATCTGGTTATTTGGTATCA	TCCCTCAAAGGCTTCCAATTT	chr6: 19950822 19950802	21	vvi_miC1038h-3p	GCTGGAAGCCGATGGGGGACC	chr6: 19950755 19950775	21	Sequence similar to known vvi-miR477a						VITIS-MIR23*				grape-m8278		vvi-miRC477j		n_346*	c205570	c106863 / c131305 / c137767 / c134088		vvi-miRn012.1
vvi_miC1038i-5p	GTTGTCAATCTCCCTCAAAGGCTTCCAATTTTCCTGGCTGATTATCAAGGTTGGAAAGTTGGAAGACAGTGGGGGACCTTGGAAGCT	TCCCTCAAAGGCTTCCAATTT	chr1: 22740274 22740294	21					Variant of vvi-miR477a in the same locus												vvi-miRC477k
vvi_miC1039-5p	CATGGGCGGTTTGGTAAGAGGGAATCTTATCACTCTCTTCCCTGGGTGGTTGCTTTCTTACCAACACCTCCCATTCC / TGGTGCGAAAACGAGGAGATCCCAGCCTCCTGAAACTTACATGGCATGGGCGGTTTGGTAAGAGGGAATCTTATCACTCTCTTCCCTGGGTGGTTGCTTTCTTACCAACACCTCCCATTCCACTAATTTTCAGTAGTTTTTCTCCCTTTAGCTCCA	CATGGGCGGTTTGGTAAGAGG	chr1: 3865585 3865605	21	vvi_miC1039-3p	TCTTACCAACACCTCCCATTCC	chr1: 3865640 3865661	22	vvi_miC1039-3p sequence similar to known vvi_miR482	id97*		VV-MIR032	va-miR072		VITIS-MIR53*	miR014	Vvi-miRC52	novel_mir_5	grape-m0721		vvi-miRC482b	vvi-New49	n_479*		c1372	Vvi-miRC52	vvi-miRn138
vvi_miC1040-3p	CTAACACCCTACCTAACATGCAATCCCACATACCCACGTGTAGAGACAAATTAACAACAATTACATATTAAAATTAAATAGATGGGAATGGTAGTAGTAGGAGAGACTTGAACTTGAGTTTGGTTAACTAGAGGTCTCAAATTCGAGTTTCTCCTATTGTTAATGTTCCCATCTACTTATCTATAATCTGTAATTGTTGCTGATTTGTCTTTTGATATGAGAGCATGGGGCCACATGTGAGGAAGGGTGTTAG	TGGGAATGGTAGTAGTAGGAGAGA	chr4: 7710787 7710764	24	vvi_miC1040-5p	TCTCCTATTGTTAATGTTCCCATC	chr4: 7710720 7710697	24	vvi_miC1040-3p partially complementary to known vvi-miR482						VITIS-MIR8												vvi-miRn121
vvi_miC1041-5p	AGAATGGGAAGGGTACGAAGAATGTAAGGAGTACTCACATTCTTTGTACATTTTCTAATTTTT	AGAATGGGAAGGGTACGAAGAAT	chr5: 9088373 9088351	23	vvi_miC1041-3p	TCTTTGTACATTTTCTAATTTTT	chr5: 9088333 9088311	23	vvi_miC1041-5p partially complementary to known vvi-miR482													vvi-New21
vvi_miC1042-5p	AGTGGGGAATTGGGAGAGGGAGCTGGGTCATCTGAAGCTTGCGGTATGGGTGGGCCGGGAAAAAATTCGAAATCCTTCAGGGTTCTCATTTCTTGCCGACTCCACCCATACCTATGGTTTCAGATTTCTCCTCCTTCTCCCTCATTCATCCCGTCT / GGGGAATTGGGAGAGGGAGCTGGGTCATCTGAAGCTTGCGGTATGGGTGGGCCGGGAAAAAATTCGAAATCCTTCAGGGTTCTCATTTCTTGCCGACTCCACCCATACCTATGGTTTCAGATTTCTCCTCCTTCTCCCTCATTCATCCC	GGTATGGGTGGGCCGGGAAAA	chr19: 9739639 9739659	21	vvi_miC1042-3p	TTGCCGACTCCACCCATACCTA	chr19: 9739689 9739710	22	vvi_miC1042-5p partially complementary to vvi-miR3632-3p. vvi_miC1042-3p sequence similar to known vvi-miR482	id113*									vvi-miRC2118								vvi-miRn024a
vvi_miC1043-3p	The authors do not report the precursor	TCTTTCCTACTCCTCCCATTC	chr17: 5523109 5523129	21	vvi_miC1043-5p	AATTGGAGAGTAGGAAAGCTT	chr17: 5523034 5523054	21	vvi_miC1043-3p variant of vvi-miR482 in the same locus						VITIS-MIR45
vvi_miC1044-3p	GGCTAAGTCTCTTTGATTCTTGTCCATGGGGTCGTTGCATGGGCTATGCCACTGCATTGGAACTCTAGGCCCGTGACAAGTGGTATCAGAGTAGGGTAGAA	CCGTGACAAGTGGTATCAGAG	chr13: 6271947 6271927	21					Sequence similar to known vvi-miR845								Vvi-miRC11									Vvi-miRC11
vvi_miC1045-3p	The authors do not report the precursor	GGCAGCAGCATACTACTTTG	chr8: 2139374 2139393	20	vvi_miC1045-5p	GGGTAGTATGCTGCTGTCTT	chr8: 2139190 2139209	20	vvi_miC1045-3p variant of vvi-miR3624-3p in the same locus							miR043
vvi_miC1046-3p	GAAGGGTATCTTGTCACAGGAGAGCGGCGATTGCCGCTTGCAATTTGCTACACAAGAGCAAGTGCCGTCTCTCCTGCGACAAGAAACCCCCAA	CGCCGCTCTCCTGTGACAAGA	chr14: 28302603 28302583	21					Variant of vvi-miR3627-3p in the same locus				va-miR030 / va-mir69
vvi_miC1047_V1-5p	GAAAGGTTCTCTTCGCAGGAGAGATGACGCCGTCGCCCATGTCCATTCGAGGGCTAGGCGCCAGCATCATTTCTCCTGCATAGGAAACCTTTC	AGGAGAGATGACGCCGTCGCC	chr6: 3976482 3976462	21	vvi_miC1047-3p	AGCATCATTTCTCCTGCATAG	chr6: 3976436 3976416	21	vvi_miC1047-5p sequence similar to known vvi-miR3627-5p																		vvi-miRn011.2
vvi_miC1047_V2-5p	GAAAGGTTCTCTTCGCAGGAGAGATGACGCCGTCGCCCATGTCCATTCGAGGGCTAGGCGCCAGCATCATTTCTCCTGCATAGGAAACCTTTC	TCGCAGGAGAGATGACGCCGT	chr6: 3976486 3976466	21	vvi_miC1047_V1-3p	CGCCAGCATCATTTCTCCTGC	chr6: 33976440 3976420	21	vvi_miC1047-5p sequence similar to known vvi-miR3627-5p. Variants of vvi_miC1047																		vvi-miRn011.1
vvi_miC1047-5p	AAGGTTCTCTTCGCAGGAGAGATGACGCCGTCGCCCATGTCCATTCGAGGGCTAGGCGCCAGCATCATTTCTCCTGCATAGGAAACCTTT	TTCGCAGGAGAGATGACGCCGT	chr6: 3976487 3976466	22	vvi_miC1047-3p	AGCATCATTTCTCCTGCATAG	chr6: 3976436 3976416	21	vvi_miC1047-5p sequence similar to known vvi-miR3627-5p			VV-MIR056			VITIS-MIR21	miR060	Vvi-miRC74	novel_mir_25			vvi-miRC391					Vvi-miRC74
vvi_miC1048-5p	TTGGGGAGTCTTGCCGCACGAGAGATGGCACCTGCTCTTTCATATATGTTGTGGGCAAGTGCCATCTTTCTGTGGCAACACACCCTCC	TTGCCGCACGAGAGATGGCACC	chr14: 28619575 28619596	22					Sequence similar to known vvi-miR3627-5p										vvi-miRC3627a
vvi_miC1049-5p	TCTGTCGCAGGAGAGATGATGCCCAGTGCAATGGTGTAGAAGCCCAGTACTTGAGCAGTAGGTATCATCTCTCCTAGACTGAGG	TCTGTCGCAGGAGAGATGATGC	chr14: 28620641 28620662	22	vvi_miC1049-3p	ATCATCTCTCCTAGACTGAGG	chr14: 28620704 28620724	21	vvi_miC1049-5p sequence similar to known vvi-miR3627-5p		miRC23	VV-MIR058	va-miR041			miR004	Vvi-miRC19		vvi-miRC5225a			vvi-New71				Vvi-miRC19	vvi-miRn107
vvi_miC1050a-5p	TCCCAGGAGAGATGGCACCTGCTTTGAGCTGTGATTGATTAAGCAGGTTTCATCTCCCTGAGACA / GAGAGAGAGAGAGAGAGGGAGGGAGGGAGGGAGGGCTGGTGTCCCAGGAGAGATGGCACCTGCTTTGAGCTGTGATTGATTAAGCAGGTTTCATCTCCCTGAGACATCAGATGCTGCTACTTCTAATCTTCCAGACACCAGTCTTTCTT	TCCCAGGAGAGATGGCACCTGC	chr17: 5927890 5927911	22	vvi_miC1050a-3p	AGGTTTCATCTCCCTGAGACA	chr17: 5927934 5927954	21	vvi_miC10501a-5p sequence similar to known vvi-miR3627-5p		miRC24_1	VV-MIR055			VITIS-MIR28							vvi-New69a	n_710
vvi_miC1050b-5p	TCCCAGGAGAGATGGCACCTGCTTTGAGCTGTGATTGATTAAGCAGGTTTCATCTCCCTGAGACA / AGGGCTGGTGTCCCAGGAGAGATGGCACCTGCTTTGAGCTGTGATTGATTAAGCAGGTTTCATCTCCCTGAGACATCAGATGCTG	TCCCAGGAGAGATGGCACCTGC	chr17: 5928114 5928135	22	vvi_miC1050b-3p	AGGTTTCATCTCCCTGAGACA	chr17: 5928158 5928178	21	vvi_miC1050b-5p sequence similar to known vvi-miR3627-5p		miRC24_2		va-miR046					novel_mir_64	vvi-miRC5225			vvi-New69b					vvi-miRn102
vvi_miC1051-3p	CCCTTTTTCTCAGCAACCAAATGGAGGGTAATCTAATCATTTATAAATTTTCCATTCTATTCTCTTTTTGCTCATTTGGTTGGCGAGAAAAGGTAG	TTGGTTGGCGAGAAAAGGTAG	chr2: 12671450 12671430	21	vvi_miC1051-5p	CCCTTTTTCTCAGCAACCAAAT	chr2: 12671525 12671504	22	vvi_miC1051-5p sequence similar to known vvi-miR3629													vvi-New90
vvi_miC1052-3p	TTAGTTCTGATCGATTTTAGAATTGTTGGTGTTTTGAGTTGTTGCCGAGAAAATGGAGGTAAGGAAAAGATAATTTAACTTTTTCGTGTTTTCTGTTGTTTTGTTTCTTAGAAATTGGAAAATTCAAATCGAAAAGGAAAAAAAAATGTATAGTGCTATGGTATCAGTAGCGTCCAGTTTTTTTTCCCTGAGCTGCATTTTCTCAGCAACCAAGTAGAGCCTTAGAATATG	TCTCAGCAACCAAGTAGAGCC	chr8: 20493018 20492998	21					Sequence similar to known vvi-miR3629							miR096	Vvi-miRC90
vvi_miC1053-5p	TGCTGGGTGTTGGCTGCTGAGAAAATGTAGGAAGAGGGAAGGAAAAATCCATTTTTGAATCTTTGATTTTTCGTGGTCTGAATATGAAACGTTGGAAGGCTTTCTTGATTGAGTCCATTGCAGCTATTTGAATCAGTTGAGGTTTTAGTTTTTCGTTTCCTCAGTTTTTTCAGCATCCA AAA	TGGCTGCTGAGAAAATGTAGG	chr14: 3031601 3031621	21					Variant of vvi-miR3629b in the same locus										vvi-miRC3629d
vvi_miC1054-5p	TGGCTGCTGAGAAAATGTAGGAAGAGGGAAGGAAAAATCCATTTTTGAATCTTTGATTTTTCGTGGTCTGAATATGAAACGTTGGAAGGCTTTCTTGATTGAGTCCATTGCAGCTATTTGAATCAGTTGAGGTTTTAGTTTTTCGTTTTCCTCAGTTTTTTCAGCATCCAAA	TGGCTGCTGAGAAAATGTAGGA	chr14: 3031602 3031623	22	vvi_miC1054-3p	CTCAGTTTTTTCAGCATCCAAA	chr14: 3031751 3031772	22	vvi_miC1054-5p variant of vvi-miR3629b in the same locus													vvi-New79
vvi_miC1055-5p	TGGTTAAGCTTGTTTGGTTGTCGAGAAAATGTGGTTTTTTGAAAACAAATGAAGGAGGAAGAAGGGTTGGGTTAGGGTTTTGGGGTTTTAAAATGAAATGATTTTTTTACTTTTACTTATTAAAAAAATGATCATTTTGTCATCGATCACACGAAGAGCACATGTA	TGTTTGGTTGTCGAGAAAATG	chr19: 10544080 10544060	21					Sequence partially complementary to known vvi-miR3629a-5p										vvi-miRC3629e
vvi_miC1056-5p	Predicted secondary structure available at doi: 10.1111/j.1364-3703.2012.00815.x	TTGACATCGTCCAACATAAT	chr5: 7680386 7680367	20					Sequence similar to known vvi-miR3631-5p					s1497299
vvi_miC1057-3p	CCTGTTAGTATCATTTAACATAATTAAATTGAACATATTGATAACAAGTTCACTTTAGCTATGTTGGATGATGTTAACAGGTT	TATGTTGGATGATGTTAACAGGTT	chr7: 12016633 12016610	24	vvi_miC1057-5p	CCTGTTAGTATCATTTAACATAAT	chr7: 12016692 12016669	24	vvi_miC1057-3p sequence similar to known vvi-miR3631-3p													vvi-New67
vvi_miC1058-5p	CATGCCACTGAGTGTGCGGAGAAGCAAAACGGAGGAGCTTGATTTATTTTAGCATTTCTCTTCAAATTTAGAGGACCGATTTGCTTCTTCCACTCGCAATGGCCTTGA	AGTGTGCGGAGAAGCAAAACGG	chr7: 4281261 4281282	22	vvi_miC1058-3p	ACCGATTTGCTTCTTCCACTC	chr7: 4281325 4281345	22	vvi_miC1058-5p similar to known vvi-miR3636-3p		miRC35	VV-MIR021			VITIS-MIR43
vvi_miC1059_V1-3p	Predicted secondary structure available at doi: 10.1111/j.1364-3703.2012.00815.x	TGTTGGATGATGTCAATAAA	chr8: 4700811 4700830	20					Variant of vvi_miC1059-3p in the same locus. Sequence similar to known vvi-miR3631					s1428712
vvi_miC1059-3p	AGTTGATATCATCCAATATAATTAAACTGAACCTATTGATAATAAGTTCATTTTAACTATGTTGGATGATGTCAATAAA	ATGTTGGATGATGTCAATAAA	chr8: 4700810 4700830	21	vvi_miC1059-5p	AGTTGATATCATCCAATATAA	chr8: 4700752 4700772	21	vvi_miC1059-3p sequence similar to known vvi-miR3631													vvi-New38
vvi_miC1060a-3p	CATGTTAATATCATTTAACATAACTAAATTGAACATATTGATAACAAGTTCACTTTAGTTATATTGGATGATGTTAACAGGTT	TATATTGGATGATGTTAACAGGTT	chr10: 3425853 3425830	24	vvi_miC1060a-5p	CATGTTAATATCATTTAACATAAC	chr10: 3425912 3425889	24	vvi_miC1060a-3p sequence similar to known vvi-miR3631													vvi-New65a
vvi_miC1060b-3p	ACTGTTGACATCGTCTAATGTAAGTAAACTGAACATATTGATAACAAGTTCACTTTAGTTATATTGGATGATGTTAACAGGTT	TATATTGGATGATGTTAACAGGTT	chr17: 6385655 6385678	24	vvi_miC1060b-5p	ACTGTTGACATCGTCTAATGTAAG	chr17: 6385596 6385619	24	vvi_miC1060b-3p sequence similar to known vvi-miR3631													vvi-New65b
vvi_miC1061-5p	AAAAATAACCTATTGATATCATCCCATATAACTAAAGTGAATTTATTAATAACAAATTCATTTTAATTATGTTAGACGATGTCAATAAGTTACTTTT	ATTGACATCGTCTAACATAA	chr13: 925150 925131	20					Sequence similar to known vvi-miR3631				va-miR078
vvi_miC1062a-3p	Predicted secondary structure available at doi: 10.1111/j.1364-3703.2012.00815.x	TGTTGGATGATGTCAACATGT	chr16: 10790761 10790741	21					Sequence similar to known vvi-miR3631					s1428710_1
vvi_miC1062b-3p	The authors do not report the precursor	TGTTGGATGATGTCAACATGT		21					Sequence similar to known vvi-miR3631.					s1428710_2
vvi_miC1063a-5p	Predicted secondary structure available at doi: 10.1111/j.1364-3703.2012.00815.x	CTGTTGACATTATCCAATATA	chr17: 10703942 10703962	21					Sequence similar to known vvi-miR3631					s885197_1
vvi_miC1063b-5p	The authors do not report the precursor	CTGTTGACATTATCCAATATA		21					Sequence similar to known vvi-miR3631.					s885197_2
vvi_miC1064-5p	Predicted secondary structure available at doi: 10.1111/j.1364-3703.2012.00815.x	TGTTGACATCGTCCAACATAA	chr18: 29017754 29017774	21					Sequence similar to known vvi-miR3631					s1428127
vvi_miC1065-5p	Predicted secondary structure available at doi: 10.1111/j.1364-3703.2012.00815.x	TGTTGACATCATCCAATATA	chrUn: 19219855 19219836	20					Variant of vvi-miR3631c in the same locus					s1428123_1, _2, _3
vvi_miC1066-3p	Predicted secondary structure available at doi: 10.1111/j.1364-3703.2012.00815.x	TTGGATGATGTCAACATGTTACTT	chr5: 6430199 6430176	24					Sequence in the same locus and complementary to to known vvi-miR3631b-5p.					s1512811
vvi_miC1067-3p	GCGGGAGCTGTGGGTATGGGAGGATTGGGGAGACGATGAATTAGGAAACTGGATCTGAAGAAAACATTTTCTTCCCAAGACCCCCCATGCCAACAGCTTCCGG / CTGTGGGTATGGGAGGATTGGGGAGACGATGAATTAGGAAACTGGATCTGAAGAAAACAT TTTCTTCCCAAGACCCCCCATGCCAACAGCT	TTCCCAAGACCCCCCATGCCAA	chr1: 3865893 3865914	22	vvi_miC1067-5p	GGTATGGGAGGATTGGGGAGA	chr1: 3865834 3865854	21	vvi_miC1067-3p in tandem with vvi_miC26-3p. vvi_miC1067-3p sequence similar to known vvi-miR3632-3p.			VV-MIR074				miR015	Vvi-miRC53*	novel_mir_6								Vvi-miRC53*	vvi-miRn024b
vvi_miC1068-5p	AAGCCTTTGGTATTGGGGGTCTGGGAAAGGTATCTTCACACATCTTCAAATGTTTAGGGACCCTTTCCATCGGCCCCCAATCCAGACGCTC	TATTGGGGGTCTGGGAAAGGTA	chr14: 23394986 23394965	21					Sequence in the same locus and complementary to known vvi-miR3632-3p									novel_mir_40
vvi_miC1069-3p	AAATGGGAGTGGTCCTCCCGGAGGCCCATGGGAATGGGTGGCTGGGATCTAATGTTTCTTCACATCATGTAGATGTGTCAAAAAGCTGAGTTGGTTCCCATGCCATCCATTCCTATCGTTCCCGGGATTTTCTCCCTTTT	TTCCTATCGTTCCCGGGATTT	chr17: 5521661 5521681	21					Sequence partially overlapping with known vvi-miR3633b-3p								Vvi-miRC33									Vvi-miRC33
vvi_miC1070-3p	TAAGAGGAGTTCTCTCCTAACCATCCATTCCTATTGCTTTCGAAATATTCATCTCCCATTTCAAACCTGCAGCCAAAACCTAAAGTACCACCCATTCTCTCTCACTCGTTATATGGGAGCAGACGAGGTGGTTTTCTAAAACCACCTTTGTTTCGCCCATGGTTTTTCAAAACCACTCACAACATTGGGCCCACCATGCCAGCTTTCCAGTTTCCACGAGTCATTCAAAATCAAGAATTTAACCAAATAAATAATTTTTTTGAAATGGGAAAAGGAGAAAAGGGAGAAAATCCCGGGAACGATAGGAATGGATGGCATGGGAACCAACTCAGCTTT	GGAATGGATGGCATGGGAACCA	chr17: 5521664 5521643	22					Sequence in the same locus and complementary to known vvi-miR3633b-3p								Vvi-miRC35									Vvi-miRC35
vvi_miC1071-5p	CTCCCGGAGGCCCATGGGAATGGGTGGCTGGGATCTAATGTTTCTTCACATCATGTAGAGTGTCAAAAAGCTGAGTTGGTTCCCATGCCATCCATTCCTATCGTTCCCGGG	GGAATGGGTGGCTGGGATCT	chr17: 5521582 5521601	20	vvi_miC1071-3p	TTCCCATGCCATCCATTCCTA	chr17: 5521646 5521666	21	Variants of vvi-miR3633b-5p and vvi-miR3633b-3p in the same locus																c70852
vvi_miC1072-5p	TCCTATTAGAAATAACATAATGCAAAATCAAGAAAATTGCAAAAATGAACAATAATAGAGAAAAAGTAAAGTTGTAGTGCATATGCCGAGAGATATGATATTATATCATCTCTTAATTTAAAATAAAATTTTGAAAATTTATTTCAAAATAATGAGGTCCATAAAATAAAAAGTTTTATACCTTTTTTTTTCCGACTCCACTCATGCCATTAAAATTTTG	ATGGCATGAGTGGAGTCGGAA	chr14: 2737942 2737962	21					Sequence partially complementary to known vvi-miR3634-3p			VV-MIR026
vvi_miC1073-3p	TGTTTCTAGTATTTCTAATACTTGAAAAATGAATATTTTCAAGGGTTAGAAAGGCTAAAAACACT	AGGGTTAGAAAGGCTAAAAACACT	chr4: 3574852 3574829	24	vvi_miC1073-5p	TGTTTCTAGTATTTCTAATACTTG	chr4: 3574893 3574870	24	vvi_miC1073-3p similar to known vvi-miR3639-5p													vvi-New29
vvi_miC1074-3p	ACCTGTTTGGATTGACTTCTGAAAGGCTAAAAGCTCTTATTAAGCTTAAATAAGAGCTTTTGGCTTCTCAGAAGTCAATCCAAACAAGGT	AGAAGTCAATCCAAACAAGGTC	chr9: 21823140 21823161	22					Sequence partially overlapping with known vvi-miR3639-3p											miRC128
vvi_miC1075-5p	TTGTAGGAATGGGCTGATTGGGATAAAAATCTTATGGTGGAAACACTTAAATTTTTTTCCCAATGCCGCCCATTCCAATGA	GGAATGGGCTGATTGGGATA	chr14: 19755563 19755544	20	vvi_miC1075-3p	TTCCCAATGCCGCCCATTCCAA	chr14: 19755512 19755491	22	Sequence similar to vvi-miR3633b-3p																		vvi-miRn024c
vvi_miC1076-3p	AGCGCTAATCAGGGTAGTATGCTGCTGTCTTTAGAATATCTGGATGAAGTTTATCTCTTCAAGGTGGCAAGAACATCAAGGGTATCATGGTGACTTCTCTGCTGGGTTGATGCTTCTTCTGAGGTGATTTGATGTCAATACTCTTGATGGTTTTGCCACCTTTGCAGATCATGAGCTCAATTCTCAACTTCTCAGGGCAGCAGCATACTACTTTGATCATCACT	TCAGGGCAGCAGCATACTACT	chr8: 2169907 2169927	21	vvi_miC1076-5p	TAGTATGCTGCTGTCTTTAGA	chr8: 2169730 2169750	21	vvi_miC1076-3p same sequence of vvi-miR3624-3p, different locus	id7b											vvi-miRC3624a						vvi-miRn096
vvi_miC1077-5p	CTGGAGTTCCTCTGAGCACTTCACCGGGGATCCTTGGTTTTCCGATTCCTACTGAAGTGTTTGGGAAACTCCCGGT	GTTCCTCTGAGCACTTCACCG	chr1: 6474860 6474880	21	vvi_miC1077-3p	CTGAAGTGTTTGGGAAACTC	chr1: 6474906 6474925	20	vvi_miC1077-3p sequence partially complementary to known vvi-miR395a-m																		vvi-miRn132
		TCGGACCAGGCTTCATTCCCC	chr7: 19450082 19450102	21		GGAATGTTGTCTGGCTCGAGG	chr7: 19450183 19450203	21	vvi-miR166f										vvi-miRC166i
		TTGAGCCGCGCCAATATCACT	chr9: 7012570 7012590	21		CGATGTTGGTGAGGTTCAATC	chr9: 7012508 7012528	21	vvi-miR171f						VITIS-MIR49*
		TGATTGAGCCGTGCCAATATC	chr17: 893602 893622	21					vvi-miR171i												vvi-miRC171l
		TTCCACAGCTTTCTTGAACTA	chr9: 7372604 7372624	21		GCTCAAGAAAGCTGTGGGAGG	chr9: 7372551 7372531	21	vvi-miR396a						VITIS-MIR54*
		ATGCACTGCCTCTTCCCTGGC	chr7: 5012011 5012031	21		CGGGGACGAGGTAGTGCATGG	chr7: 5011945 5011965	21	vvi-miR408						VITIS-MIR15*
		TCTTTCCTACTCCTCCCATTCC	chr17: 5523109 5523130	22		AATTGGAGAGTAGGAAAGCTT	chr17: 5523034 5523054	21	vvi-miR482										grape-m3245
		TAATCTGCATCCTGAGGTCTA	chr8: 15368718 15368738	21		GTCCTCTGGTTGCAGATTACT	chr8: 15368672 15368692	21	vvi-miR2111			VV-MIR048	va-miR055
		TGGTGCTTGGACGAATTTGCTA	chr18: 24650103 24650124	22		TCACAAGTTCATCCAAGCACCA	chr18: 24650029 24650050	22	vvi-miR3623	id47		VV-MIR054	va-miR047
		TCAGGGCAGCAGCATACTACT	chr8: 2139370 2139390	21					vvi-miR3624-3p	id7a
		CGGGAGATGACTACTGGAAGC	chr17: 2378222 2378242	21					vvi-miR3625-3p				va-miR067
		TTGTCGCAGGAGAGACGGCACT	chr14: 28302656 28302635	22					vvi-miR3627-5p				va-miR011
		TGTTGGATGATGTCAATAAGT	chr5: 6430243 6430263	21					vvi-miR3631b-3p					s1428721
		CATGTTGACATCATCCAATATA	chr17: 3471844 3471823	22					vvi-miR3631d			VV-MIR033
		GGAATGGATGGTTAGGAGAG	chr17: 5521938 5521957	20		TTCCTATACCACCCATTCCCTA	chr17: 5522014 5522035	22	vvi-miR3633a			VV-MIR040	va-miR104												c70853
		GGAATGGGTGGCTGGGATCTA	chr17: 5521582 5521602	21		GTTCCCATGCCATCCATTCCTA	chr17: 5521645 5521666	22	vvi-miR3633b			VV-MIR041
		TTTCCGACTCGCACTCATGCCGT	chr17: 5681249 5681227	23		GGCATATGTGTGACGGAAAGA	chr17: 5681269 5681289	21	vvi-miR3634			VV-MIR076	va-miR007
		AGAGCTTTCTTCAGTCCACTC	chr2: 855731 855711	21					vvi-miR319c*														n_290
		GAGCTTTCTTCAGTCCACTC	chr2: 855730 855711	20					vvi-miR319c*																c76368 / c92678 / c96943 / c94391
		GGAGTGACCTGAGAATCACATG	chr6: 15575591 15575612	22					vvi-miR398c*														n_312
		AGTTTGTGCGCGAATCCAACC	chr5: 166492 166512	21					vvi-miR403d*																c119966
		AGTTTGTGCGCGAATCCAACG	chr5: 600191 600211	21					vvi-miR403b*																c115076
		AGTTTGTGCGTGACTCTAAAA	chr7: 4179770 4179750	21					vvi-miR403f*																c133572 / c140070 /c136381
