# Supplementary material for: miRVIT: A Novel miRNA Database and Its Application to Uncover Vitis Responses to Flavescence dorée Infection
Source: Front Plant Sci. 2018 Jul 17;9:1034. doi: 10.3389/fpls.2018.01034 (PMC6057443; doi:10.3389/fpls.2018.01034)
Supplement: Supplementary file 9 [file Table_9.XLSX]

## Sheet: Table S9
Table S9. Normalised number of reads of novel miRNAs in leaf midribs of FDp infected (FD), recovered (R ) and healthy (H) ‘Barbera’ plants.
	H rep 1	H rep 2	H rep 3	R rep 1	R rep 2	R rep 3	FD rep 1	FD rep 2	FD rep 3
vvi_miC1-5p	0	0	0.0781945	0	0	0	0	0	0
vvi_miC2-3p	0.0746385	0	0	0	0	0	0	0	0
vvi_miC7-5p	0	0.0709149	0.0781945	0.152267	0.165853	0.652839	0.0796635	0.154741	0.224712
vvi_miC8-5p	0.298554	0.0709149	0.0781945	0	0.49756	0.0932628	0.0796635	0.0773703	0.224712
vvi_miC10-5p	0	0	0	0	0.0829267	0	0	0.0773703	0
vvi_miC17-3p	0.9703	2.26928	1.4075	2.58854	8.7073	2.79788	1.83226	4.33274	1.7977
vvi_miC25-5p	0.0746385	0.0709149	0	0	0.165853	0	0	0.0773703	0
vvi_miC31-3p	0.373192	1.13464	1.09472	1.21814	1.2439	0.746102	1.43394	2.01163	1.12356
vvi_miC32-5p	0	0	0	0	0	0	0	0.0773703	0
vvi_miC33-3p	0	0.0709149	0	0.152267	0	0	0.0796635	0	0
vvi_miC42e-3p	0.0746385	0	0	0	0	0	0	0	0
vvi_miC42f-3p	0.0746385	0	0	0	0	0	0	0	0
vvi_miC42g-3p	0.149277	0	0	0	0	0	0	0	0
vvi_miC42h-3p	0.0746385	0	0	0	0	0	0	0	0
vvi_miC44a-5p	0	0	0	0.152267	0	0	0	0	0
vvi_miC44b-5p	0	0	0	0.152267	0	0	0	0	0
vvi_miC44c-5p	0	0	0	0.152267	0	0	0	0	0
vvi_miC44d-5p	0	0	0	0.152267	0	0	0	0	0
vvi_miC44e-5p	0	0	0	0.152267	0	0	0	0	0
vvi_miC44f-5p	0	0	0	0.152267	0	0	0	0	0
vvi_miC44g-5p	0	0	0	0.152267	0	0	0	0	0
vvi_miC44h-5p	0	0	0	0.152267	0	0	0	0	0
vvi_miC44i-5p	0	0	0	0.152267	0	0	0	0	0
vvi_miC44j-5p	0	0	0	0.152267	0	0	0	0	0
vvi_miC47-5p	0	0	0	0	0	0	0.0796635	0	0
vvi_miC54-5p	0	0	0.0781945	0	0	0	0	0	0
vvi_miC57-5p	0.223915	0.28366	0.0781945	0	0.0829267	0	0.398318	0.696333	0.224712
vvi_miC61-5p	0.223915	0.0709149	0.156389	0	0.414634	0	0.238991	0.232111	0
vvi_miC64-3p	0	0	0.0781945	0.304534	0.331707	0.186526	0	0.232111	0
vvi_miC64-5p	0	0	0	0	0	0.0932628	0	0.154741	0
vvi_miC67_V1-3p	0.0746385	0.0709149	0.469167	0.456802	0.331707	0.186526	0.0796635	0.773703	0.449425
vvi_miC73-3p	0	0	0	0	0	0.373051	0	0	0
vvi_miC86-5p	0.149277	0.14183	0.390972	0.152267	0.331707	0.186526	0.0796635	0.386852	0.224712
vvi_miC98-3p	1.34349	1.98562	1.4075	1.82721	1.82439	2.23831	0.955962	1.77952	0
vvi_miC102-3p	1.19422	0.921894	0.469167	0.609069	0.331707	0.932628	1.35428	1.23793	1.12356
vvi_miC104-3p	0.149277	0.14183	0	0	0.165853	0.0932628	0.0796635	0.618963	0
vvi_miC105-3p	0	0	0	0	0	0.0932628	0	0.0773703	0
vvi_miC110-3p	0.298554	0.212745	0.234583	0.761336	0.24878	0.0932628	0.238991	0.232111	0.224712
vvi_miC114-3p	0.298554	0.0709149	0.70375	0.609069	0.663414	0.652839	1.19495	1.62478	0.449425
vvi_miC115-5p	0.821023	0.780064	1.09472	1.52267	0.49756	0.559577	1.99159	1.93426	0.89885
vvi_miC117-3p	0	0	0	0.304534	0	0	0	0	0.224712
vvi_miC117-5p	0	0	0	0	0.165853	0	0	0.232111	0
vvi_miC121-3p	0	0	0	0	0	0	0	0.0773703	0
vvi_miC123-3p	0	0.0709149	0	0	0	0	0	0	0
vvi_miC124-3p	0.223915	0	0	0	0.0829267	0.279788	0	0	0
vvi_miC125_V1-3p	0.8	0.9	0.2	1.8	0.7	0.7	0.9	1.5	0
vvi_miC125_V1-5p	0	0	0	0	0.1	0.1	0	0.2	0
vvi_miC125-3p	2.46307	1.4183	0.781945	3.65441	2.40487	3.17093	2.86789	2.55322	2.24712
vvi_miC132-3p	17.0176	14.6794	15.1697	29.5398	32.756	23.1292	27.4042	24.2169	20.8983
vvi_miC132-5p	20.4509	15.814	12.7457	42.6348	24.0487	27.2327	39.1148	36.0546	16.6287
vvi_miC135-5p	0.0746385	0.212745	0.312778	0	0.0829267	0.0932628	0.159327	0.232111	0
vvi_miC136	0.149277	0.14183	0.156389	0.152267	0.24878	0.0932628	0	0.618963	0
vvi_miC137-3p	3.13482	2.26928	1.32931	2.58854	2.98536	1.86526	7.56803	11.064	4.26954
vvi_miC137-5p	0.671746	0.638235	0.469167	1.06587	1.74146	1.4922	4.70015	3.86852	2.92126
vvi_miC146-5p	0.373192	0.212745	0.234583	0	0.24878	0.0932628	0.159327	0.0773703	0
vvi_miC147-3p	0	0.28366	0.0781945	0.304534	0.414634	0.279788	0.238991	0.232111	0.449425
vvi_miC150-3p	0	0	0	0	0	0.0932628	0	0	0
vvi_miC156-3p	0.149277	0.0709149	0	0	0.331707	0.0932628	0.0796635	0.0773703	0
vvi_miC163-5p	0.298554	0.28366	0	0	0.331707	0	0	0	0
vvi_miC164-5p	0	0	0	0	0.0829267	0.0932628	0	0.0773703	0
vvi_miC167-3p	0	0	0	0	0.0829267	0	0	0	0
vvi_miC171-5p	0.0746385	0.0709149	0	0	0	0.0932628	0	0	0
vvi_miC173_V1-5p	0.223915	0.212745	0	0	0.580487	0	0.0796635	0.541592	0.224712
vvi_miC173-3p	1.3	1.3	0.2	0.6	1	0.9	0.4	2.2	1.3
vvi_miC173-5p	0	0.212745	0	0.152267	0.24878	0.186526	0	0	0.449425
vvi_miC175_V1-5p	0	0	0	0.152267	0	0	0	0	0
vvi_miC175-3p	2.68699	7.02058	3.04959	6.85202	13.0195	4.29009	2.78822	5.64803	3.5954
vvi_miC175-5p	106.584	116.726	83.9027	119.53	145.785	155.189	222.659	322.944	107.188
vvi_miC182-3p	0.671746	1.13464	0.234583	1.3704	1.16097	0.652839	0.477981	0.773703	1.34827
vvi_miC186_V1-3p	0	0	0	0	0	0	0.1	0.1	0
vvi_miC186_V2-3p	0	0.1	0	0	0.1	0	0	0	0
vvi_miC186_V2-5p	0	0	0	0	0	0	0	0.1	0.2
vvi_miC186-5p	0	0	0	0	0	0	0.0796635	0.154741	0
vvi_miC191-3p	0	0	0	0	0	0	0.0796635	0	0.224712
vvi_miC191-5p	0	0.0709149	0.70375	0.152267	0.49756	0.186526	0.159327	0.386852	0
vvi_miC197_V1-5p	0.149277	0.0709149	0	1.21814	0.24878	0	0	0.0773703	0
vvi_miC197-5p	0.149277	0.0709149	0.0781945	0.913603	0.580487	0.652839	0	0	0.224712
vvi_miC198a-5p	0	0	0	0	0	0.0932628	0	0	0
vvi_miC198b_V1-3p	0	0	0	0	0	0	0.1	0	0
vvi_miC198b_V1-5p	0	0	0	0	0	0.1	0	0	0
vvi_miC198b-3p	0	0	0	0	0	0	0.0796635	0	0
vvi_miC199-5p	0.223915	0.354575	0.547361	0.304534	0.414634	0.373051	1.27462	0.464222	0.674137
vvi_miC200-3p	0.149277	0.14183	0	0	0	0.279788	0	0.309481	0.224712
vvi_miC200-5p	0.223915	0.921894	0.234583	0.609069	0.663414	0.466314	1.03563	1.3153	0.449425
vvi_miC201-5p	1.9406	1.34738	1.64208	1.3704	2.23902	2.05178	2.78822	3.79115	1.12356
vvi_miC202-3p	0.149277	0.28366	0.0781945	0	0.165853	0.0932628	0.238991	0.232111	0
vvi_miC205-3p	0	0	0	0	0.0829267	0	0	0	0
vvi_miC209-3p	0	0	0	0	0	0.0932628	0	0	0
vvi_miC210-3p	0	0.0709149	0	0	0	0	0.0796635	0.232111	0
vvi_miC210-5p	0	0	0	0	0.0829267	0.0932628	0	0	0
vvi_miC211-5p	12.3154	9.71535	6.25556	12.3336	12.0244	11.4713	14.6581	12.1471	13.7075
vvi_miC213-5p	0	0.0709149	0.0781945	0	0.0829267	0	0.159327	0	0
vvi_miC220_V1-5p	0	0	0.0781945	0	0	0	0	0.0773703	0
vvi_miC220_V2-5p	0	0.0709149	0.0781945	0.152267	0	0.279788	0.0796635	0.154741	0
vvi_miC220-3p	0.0746385	0	0.0781945	0.152267	0.331707	0.279788	0.637308	0.386852	0
vvi_miC220-5p	0	0.14183	0.0781945	0	0	0.186526	0.238991	0	0.224712
vvi_miC223-5p	0.223915	0.14183	0.0781945	0	0.0829267	0.186526	0.159327	0.154741	0
vvi_miC224a-5p	0.0746385	0.14183	0.156389	0.152267	0.74634	0.279788	0.0796635	0.232111	0
vvi_miC224b-5p	0.447831	0.354575	0.156389	0	0.24878	0.0932628	0.318654	0	0.674137
vvi_miC226-5p	0	0.0709149	0	0	0	0.0932628	0.0796635	0.309481	0
vvi_miC228-3p	0.0746385	0	0	0	0.0829267	0.466314	0.318654	0.541592	0
vvi_miC229	0	0	0	0	0	0	0.0796635	0.232111	0.224712
vvi_miC232-5p	0	0	0	0	0	0	0.0796635	0.154741	0
vvi_miC233-3p	0	0	0.0781945	0	0	0	0	0	0
vvi_miC238-5p	0	0.0709149	0.0781945	0	0	0	0	0	0
vvi_miC242a-5p	0	0.0709149	0	0	0	0	0	0	0
vvi_miC242b-3p	0	0.0709149	0	0	0	0	0	0	0
vvi_miC242c-5p	0	0.0709149	0	0	0	0	0	0	0
vvi_miC243_V1-3p	0.0746385	0	0	0	0.0829267	0	0.0796635	0.154741	0
vvi_miC243_V1-5p	0	0.1	0	0	0	0	0	0	0
vvi_miC255-5p	0	0.0709149	0	0.152267	0	0	0	0.309481	0.224712
vvi_miC263_V1-5p	0	0.1	0	0	0.1	0	0	0	0
vvi_miC263-5p	0	0	0	0	0.0829267	0	0	0	0
vvi_miC265-5p	0	0	0	0	0.0829267	0	0.0796635	0	0
vvi_miC274-3p	0.522469	0.28366	0.156389	0.304534	0.165853	0.373051	0	0.154741	0
vvi_miC276-3p	0	0	0	0	0	0.186526	0.0796635	0.154741	0
vvi_miC277-3p	0	0.14183	0.0781945	0.152267	0	0.652839	0.557645	0.386852	1.12356
vvi_miC280-3p	0.0746385	0	0	0	0	0	0	0	0
vvi_miC281-5p	0	0	0	0.152267	0.165853	0.0932628	0.0796635	0	0
vvi_miC288a-5p	1.26885	0.42549	0.547361	0.609069	0.414634	0.559577	0.0796635	0.464222	0.224712
vvi_miC288b-5p	0.895662	0.354575	0.547361	0.304534	0.0829267	0.466314	0.716972	0.618963	0.674137
vvi_miC290-3p	1.19422	0.496405	0.781945	1.52267	0.24878	0.839365	0.876299	1.23793	1.12356
vvi_miC297_V1-5p	0.0746385	0.28366	0.234583	0.304534	0.24878	0.279788	0.477981	0.464222	0
vvi_miC299	0	0	0	0	0	0	0.0796635	0.154741	0
vvi_miC301a-3p	0.298554	0.14183	0	0.152267	0.331707	0.0932628	0.159327	0.232111	0
vvi_miC301b-3p	0.223915	0.14183	0.0781945	0.304534	0	0.0932628	0	0.232111	0.674137
vvi_miC303-5p	0.0746385	0.0709149	0.0781945	0	0	0	0	0	0
vvi_miC305-3p	0	0.0709149	0	0	0.49756	0.0932628	0.159327	0.154741	0.449425
vvi_miC309a-3p	0	0	0	0	0	0	0	0.0773703	0
vvi_miC309b-3p	0	0	0	0	0	0	0.318654	0.0773703	0
vvi_miC311-5p	0.149277	0.56732	0.625556	0.456802	0.580487	0.373051	0.637308	0.696333	1.7977
vvi_miC316-5p	0	0.28366	0.234583	0	0.165853	0.186526	0.238991	0	0
vvi_miC318-3p	0.223915	0.28366	0.234583	0.913603	0.829267	0.746102	0.159327	0.696333	0
vvi_miC318-5p	0	0	0	0	0	0.0932628	0	0	0
vvi_miC321_V1-3p	0.298554	0.56732	0.312778	0.152267	0.912194	0.559577	0.557645	1.00581	0.89885
vvi_miC321-3p	0.373192	0.780064	0.625556	0.609069	0.663414	0.373051	0.398318	0.696333	0
vvi_miC322a-5p	0	0.0709149	0	0	0	0.0932628	0	0	0
vvi_miC322b-5p	0	0	0.156389	0.152267	0	0.0932628	0	0.0773703	0.224712
vvi_miC324	0	0.0709149	0	0	0.165853	0	0	0.0773703	0
vvi_miC330-5p	0.447831	0.28366	0.234583	0.152267	1.57561	0.373051	0.955962	0.541592	0.674137
vvi_miC336-5p	3.13482	2.90751	3.67514	2.74081	3.64877	3.07767	2.46957	4.02326	2.69655
vvi_miC338_V1-3p	15.6741	14.2539	11.7292	13.704	12.2732	17.1604	13.7818	12.6887	10.3368
vvi_miC338_V1-5p	47.1715	45.2437	61.5391	35.1737	51.2487	43.7402	22.5448	44.3332	18.8758
vvi_miC338_V2-3p	0	0.212745	0	0.152267	0.0829267	0.186526	0	0.232111	0
vvi_miC338-3p	38.3642	56.9447	51.452	83.8992	17.3317	44.2998	154.946	152.884	74.3798
vvi_miC338-5p	643.16	688.3	1664.45	723.421	632.15	1417.41	332.675	696.797	490.772
vvi_miC342a-3p	0	0	0	0.152267	0	0	0	0	0
vvi_miC342b-3p	0	0	0	0.152267	0	0	0	0	0
vvi_miC343-3p	0.0746385	0.14183	0.0781945	0.152267	0.165853	0	0.0796635	0.464222	0
vvi_miC343-5p	0	0	0	0	0	0	0	0.154741	0
vvi_miC345_V1-3p	0.149277	0	0.0781945	0.152267	0.24878	0.186526	0.0796635	0.154741	0
vvi_miC345-3p	0	0.42549	0.0781945	0	0.165853	0.186526	0.159327	0	0.224712
vvi_miC349-3p	0	0	0	0	0	0	0	0.0773703	0
vvi_miC350-5p	0	0	0.156389	0	0.0829267	0	0.159327	0.154741	0
vvi_miC351-3p	0	0	0	0	0	0	0	0.0773703	0
vvi_miC351-5p	0	0	0	0	0.24878	0	0	0	0
vvi_miC353-3p	0.298554	0.212745	0.234583	0.152267	0	0.0932628	0.238991	0.464222	0.224712
vvi_miC357a-5p	0	0.0709149	0	0	0	0	0	0	0
vvi_miC357b-5p	0	0.0709149	0	0	0	0	0	0	0
vvi_miC357c-5p	0	0.0709149	0	0	0	0	0	0	0
vvi_miC360-3p	1.56741	0.42549	1.56389	3.04534	1.40975	1.11915	3.42553	3.32692	4.49425
vvi_miC361-5p	0	0	0	0	0.0829267	0	0.0796635	0	0
vvi_miC364-5p	0	0.0709149	0	0	0	0	0	0	0
vvi_miC368-3p	1.56741	0.850979	1.17292	0.761336	1.57561	1.11915	2.07125	1.77952	1.34827
vvi_miC370-3p	0.0746385	0	0.156389	0	0.0829267	0	0.238991	0.154741	0.449425
vvi_miC370-5p	0.223915	0.14183	0.234583	0.456802	0.580487	0.279788	2.46957	4.178	0.89885
vvi_miC373a-5p	0	0	0	0	0	0	0.238991	0.386852	0
vvi_miC373b-5p	0	0.0709149	0	0	0	0	0.159327	0	0
vvi_miC375-5p	0.223915	0.0709149	0.312778	0.152267	0	0.279788	0.796635	0.541592	0.449425
vvi_miC376-3p	0.0746385	0	0	0	0.24878	0.186526	0.0796635	0	0.224712
vvi_miC377-5p	2.01524	1.48921	2.18945	1.3704	2.73658	4.56988	1.99159	4.41011	1.7977
vvi_miC386-5p	0.0746385	0.14183	0	0	0.0829267	0	0	0.0773703	0
vvi_miC387a-3p	0.223915	0	0.0781945	0	0.414634	0	0	0.0773703	0.224712
vvi_miC387a-5p	0.149277	0.212745	0.156389	0.152267	0.165853	0	0.0796635	0	0
vvi_miC387b_V1-5p	0	0.0709149	0.156389	0	0	0	0.238991	0.0773703	0
vvi_miC387b-3p	0	0	0	0	0.331707	0	0	0.386852	0
vvi_miC387b-5p	0	0.212745	0.234583	0	0.24878	0	0	0.541592	0.449425
vvi_miC388-3p	0	0.0709149	0	0	0	0.0932628	0	0	0
vvi_miC389-3p	0	0	0	0	0.0829267	0	0	0	0
vvi_miC396-5p	0.0746385	0	0	0	0	0	0	0	0
vvi_miC398-3p	0	0	0	0	0.0829267	0	0	0	0
vvi_miC399-5p	0	0	0	0	0.0829267	0	0	0	0
vvi_miC405-3p	0	0	0	0	0	0	0.159327	0	0
vvi_miC408-5p	0.0746385	0.0709149	0.156389	0	0	0	0.238991	0.232111	0.674137
vvi_miC413-5p	3.06018	2.62385	3.36236	4.87255	5.72194	5.22272	2.70856	3.24955	3.37069
vvi_miC415-5p	0	0	0	0	0.0829267	0	0.0796635	0	0
vvi_miC416-3p	2.01524	0.56732	0.547361	0.456802	1.07805	1.86526	0.477981	0.928444	0.89885
vvi_miC419-3p	0	0	0	0.152267	0	0	0	0	0
vvi_miC420-3p	0.149277	0.0709149	0	0.152267	0	0.186526	0.0796635	0.0773703	0
vvi_miC420-5p	0	0	0.156389	0	0	0.0932628	0.318654	0.154741	0
vvi_miC422-3p	0	0	0	0.152267	0	0	0	0	0
vvi_miC425	0	0.0709149	0	0	0	0	0	0.0773703	0
vvi_miC427a-3p	0	0	0	0	0.165853	0	0	0	0
vvi_miC427b-3p	0	0	0	0	0.165853	0	0	0	0
vvi_miC430-5p	0.0746385	0	0	0	0.0829267	0.279788	0.159327	0.309481	0.224712
vvi_miC433-5p	0	0	0	0	0	0	0.0796635	0.232111	0
vvi_miC435-3p	0.223915	0.212745	0.156389	0.456802	0.24878	0	0.398318	0.541592	0
vvi_miC437-3p	0.671746	0.0709149	0.390972	0.761336	0.414634	0.186526	1.19495	1.08318	0.449425
vvi_miC440-3p	0.0746385	0.14183	0.0781945	0	0.0829267	0.0932628	0.238991	0.851074	0.224712
vvi_miC442-5p	0	0	0	0.152267	0	0	0	0	0
vvi_miC443-3p	0	0.0709149	0.156389	0.152267	0.165853	0.0932628	0.318654	0.696333	0
vvi_miC448-3p	0.895662	0.354575	0.0781945	0.304534	0.912194	0.279788	0.477981	0.464222	0.224712
vvi_miC451-3p	0.0746385	0	0	0	0.0829267	0.0932628	0	0.0773703	0.224712
vvi_miC454-3p	0	0	0	0	0.0829267	0	0.0796635	0	0
vvi_miC454-5p	0	0	0	0	0	0.0932628	0	0	0
vvi_miC456-5p	0.149277	0.0709149	0	0.152267	0.165853	0.186526	0.318654	0.154741	0.224712
vvi_miC457-3p	0.149277	0.14183	0	0	0.24878	0	0.0796635	0.232111	0
vvi_miC462-5p	0.895662	0.28366	0.390972	1.06587	0.331707	0.186526	1.43394	1.08318	1.34827
vvi_miC469-5p	0	0.0709149	0	0	0	0	0	0	0
vvi_miC474a-3p	0	0.0709149	0	0.152267	0	0	0	0	0
vvi_miC474b-3p	0	0	0	0.152267	0.0829267	0	0	0	0
vvi_miC474c-3p	0	0	0	0.152267	0	0	0.0796635	0	0
vvi_miC478-5p	0	0	0	0	0	0	0	0.0773703	0
vvi_miC479-3p	0	0	0.0781945	0	0.0829267	0	0.318654	0.232111	0.224712
vvi_miC482-5p	0	0	0	0	0	0	0	0.0773703	0
vvi_miC490-3p	0	0	0	0	0	0	0	0.0773703	0
vvi_miC492-5p	0.0746385	0.354575	0.156389	0	0.24878	0.279788	0.0796635	0.154741	0
vvi_miC494-3p	0.0746385	0	0	0	0.0829267	0.0932628	0	0	0
vvi_miC496	0.223915	0.0709149	0.156389	0.304534	0.331707	0.0932628	0	0.464222	0.224712
vvi_miC500	0	0	0	0	0	0	0.159327	0.0773703	0
vvi_miC506_V1-3p	0.1	0	0	0	0.1	0	0	0.1	0
vvi_miC509a-3p	0	0	0	0	0	0	0	0	0.2
vvi_miC509b-3p	0	0	0	0	0	0	0	0.1	0
vvi_miC511a-3p	0	0	0	0	0	0	0	0	0.2
vvi_miC511b-5p	0	0	0	0	0	0	0	0.1	0
vvi_miC511c-5p	0	0	0	0	0	0	0	0.1	0
vvi_miC511d-5p	0	0	0	0	0	0	0	0.1	0
vvi_miC511e-5p	0	0	0	0	0	0	0	0.1	0
vvi_miC511f-5p	0	0	0	0	0	0	0	0.1	0
vvi_miC511g-5p	0	0	0	0	0	0	0	0.1	0
vvi_miC512a-3p	0	0.1	0	0	0	0	0	0	0
vvi_miC512b-5p	0	0.1	0	0	0	0	0	0	0
vvi_miC512c-5p	0	0.1	0	0	0	0	0	0	0
vvi_miC512d-5p	0	0.1	0	0	0	0	0	0	0
vvi_miC523-3p	0.1	0.1	0	0	0	0	0	0	0
vvi_miC537-3p	0	0.1	0.1	0	0.2	0	0	0	0
vvi_miC537-5p	0.1	0.4	0.3	0	0.2	0	0.1	0.5	0
vvi_miC538-3p	0.1	0	0.1	0.2	0	0.1	0.2	0	0
vvi_miC546-3p	0	0	0	0	0	0.1	0	0	0
vvi_miC552-3p	0	0	0	0	0	0.1	0	0	0
vvi_miC552-5p	0.1	0	0.1	0	0.1	0	0.2	0.1	0
vvi_miC554-5p	0	0	0	0	0	0	0	0.1	0
vvi_miC565-3p	0	0.1	0	0	0	0	0	0.1	0
vvi_miC565-5p	0	0	0.1	0	0	0	0	0	0
vvi_miC578-3p	0	0	0	0	0.1	0	0	0	0
vvi_miC582-3p	0	0	0.2	0.3	0.1	0.1	0	0.1	0.2
vvi_miC582-5p	0.1	0.1	0	0	0.1	0.4	0.2	0.4	0
vvi_miC584-3p	0	0.3	0.1	0.2	0.2	0	0.5	0.3	0.2
vvi_miC584-5p	0.1	0.1	0.3	0.3	0.2	0	0.2	0.9	0.4
vvi_miC586-3p	0	0	0	0	0	0	0	1.2	0
vvi_miC586-5p	0	0	0	0.2	0.2	0	0	0.1	0
vvi_miC588-3p	1.4	1.1	1.3	2.7	1.6	1.8	1.6	2.3	0.7
vvi_miC588-5p	0.2	0	0.1	0	0	0	0.1	0.2	0
vvi_miC589-5p	0	0.1	0	0	0	0	0	0	0
vvi_miC592-5p	0	0	0	0	0.1	0	0.1	0	0
vvi_miC593-3p	0.1	0	0.1	0	0.1	0.1	0	0.2	0
vvi_miC593-5p	0.7	1.1	0.7	1.8	0.9	1.1	2.6	4.7	1.8
vvi_miC595-5p	0	0	0	0.2	0.1	0.1	0	0	0
vvi-miC999-3p	0	0	0.0781945	0	0	0.0932628	0	0.0773703	0
vvi_miC1000a-5p	0.149277	0	0	0.152267	0.0829267	0.0932628	0	0	0
vvi_miC1000b-5p	0.149277	0	0.0781945	0	0.0829267	0.0932628	0.238991	0	0.224712
vvi_miC1000c-3p	0.0746385	0.0709149	0	0	0.0829267	0	0	0	0
vvi_miC1000d-3p	0	0.28366	0.0781945	0.152267	0.0829267	0	0	0.232111	0
vvi_miC1000e-5p	0	0.0709149	0	0.152267	0.0829267	0.0932628	0.0796635	0	0
vvi_miC1001-5p	0	0	0	0.152267	0	0.0932628	0	0	0.224712
vvi_miC1002a-5p	0	0	0	0	0	0	0	0.0773703	0
vvi_miC1002b-3p	0.597108	0.496405	0.0781945	0.913603	0.331707	0.186526	0.398318	0.464222	0.449425
vvi_miC1002b-5p	0	0	0	0	0	0	0	0.0773703	0
vvi_miC1002c-3p	0.373192	0.780064	0.156389	0.152267	0.165853	0.559577	0.318654	0.696333	0.224712
vvi_miC1002c-5p	0	0.0709149	0	0	0	0	0	0	0
vvi_miC1002d-5p	0	0	0	0	0	0	0	0.0773703	0
vvi_miC1002e	0	0	0	0.152267	0	0	0	0	0
vvi_miC1002f	0	0	0	0	0.0829267	0	0	0	0
vvi_miC1002g	0	0	0	0	0.0829267	0	0	0	0
vvi_miC1003_V1-3p	0	0	0	0	0.2	0	0	0	0
vvi_miC1003_V1-5p	0.1	0.1	0	0	0.3	0	0	0.1	0
vvi_miC1003-3p	0.149277	0.212745	0.234583	0.152267	1.90731	0.186526	0.0796635	0.309481	0
vvi_miC1003-5p	0.0746385	0.14183	0.156389	0	0.99512	0.0932628	0	0.154741	0
vvi_miC1006-3p	0.149277	0.0709149	0.390972	0	0.24878	0.0932628	0.318654	0.773703	0.224712
vvi_miC1006-5p	0.0746385	0	0	0	0	0	0	0.0773703	0.224712
vvi_miC1007-3p	1.71669	3.82941	0.860139	4.87255	2.32195	2.33157	6.69173	4.33274	1.57299
vvi_miC1008a-5p	0	0.0709149	0	0	0	0	0	0	0
vvi_miC1008b-5p	0	0.0709149	0	0	0	0	0	0	0
vvi_miC1009-3p	0.373192	0.28366	0.0781945	0.152267	0.580487	0.186526	0.0796635	0	0
vvi_miC1009-5p	0	0	0	0	0.165853	0	0	0	0
vvi_miC1011-3p	0	0	0	0	0.331707	0	0	0.154741	0
vvi_miC1011-5p	0.0746385	0.780064	0.390972	0.609069	2.32195	1.39894	0.716972	1.3153	1.12356
vvi_miC1012-5p	0	0.0709149	0.0781945	0	0	0.0932628	0	0.232111	0
vvi_miC1012b_V1-5p	0.1	0.1	0	0	0.2	0.4	0	0.2	0.2
vvi_miC1012b-5p	0.1	0	0.2	0	0.1	0	0	0.3	0
vvi_miC1013a-3p	0	0	0	0.152267	0	0	0	0.0773703	0.449425
vvi_miC1013b-3p	0	0	0	0.152267	0.0829267	0	0	0.0773703	0
vvi_miC1013b-5p	50.9035	43.6127	33.9364	96.0806	97.4389	79.9262	50.9846	77.6798	34.6057
vvi_miC1014-3p	0.895662	1.13464	0.625556	1.52267	1.82439	0.932628	1.19495	0.851074	1.12356
vvi_miC1015-3p	2.76162	2.34019	0.860139	1.97947	2.65365	3.07767	1.83226	2.089	1.34827
vvi_miC1016a-3p	0.223915	0	0.0781945	0	0	0	0.0796635	0	0
vvi_miC1016a-5p	0.447831	0.0709149	0	0.304534	0.414634	0.0932628	0.398318	0.0773703	0
vvi_miC1016b-3p	0.149277	0	0	0	0	0.559577	0	0.232111	0
vvi_miC1016b-5p	0.223915	0.14183	0.156389	0.456802	0.331707	0.0932628	0.238991	0.309481	0.224712
vvi_miC1019-3p	0.223915	0.0709149	0.156389	0.609069	0	0.279788	0	0.309481	0.224712
vvi_miC1022-3p	0	0	0	0.304534	0	0	0	0	0
vvi_miC1022-5p	5.89644	4.82222	4.14431	3.95895	5.80487	4.47661	3.42553	2.94007	2.24712
vvi_miC1023-3p	0.223915	0.0709149	0.156389	0.152267	0.165853	0.0932628	0.159327	0.0773703	0
vvi_miC1023-5p	0	0	0	0	0	0.0932628	0	0	0
vvi_miC1025-5p	0	0	0	0	0	0	0	0	0.449425
vvi_miC1026_V1-3p	0.0746385	0	0.0781945	0	0.24878	0.0932628	0.159327	0.0773703	0.224712
vvi_miC1026_V1-5p	0.597108	1.48921	0.70375	1.67494	3.06829	2.61136	1.35428	1.39267	0.449425
vvi_miC1026-3p	0.0746385	0.0709149	0.156389	0.152267	0.0829267	0.0932628	0.0796635	0	0
vvi_miC1026-5p	0	0	0	0	0.165853	0	0	0	0
vvi_miC1027-3p	2.01524	1.70196	1.72028	2.13174	3.06829	1.95852	0.876299	1.39267	0.674137
vvi_miC1027-5p	7.53849	10.0699	8.67959	19.0334	17.1658	14.6423	7.01039	9.20707	6.74137
vvi_miC1028-3p	0	0	0	0	0	0	0.0796635	0	0
vvi_miC1030-3p	0	0	0	0.152267	0	0	0	0	0
vvi_miC1030-5p	0	0	0	0	0	0	0.1	0	0
vvi_miC1031-5p	0	0	0.0781945	0.304534	0.165853	0.373051	0.398318	0.232111	0
vvi_miC1032a-3p	0.0746385	0.0709149	0.0781945	0	0.0829267	0	0.0796635	0.0773703	0.224712
vvi_miC1032b-3p	0	0.0709149	0	0	0	0.0932628	0	0.154741	0
vvi_miC1036-5p	0	0	0.0781945	0	0	0	0	0	0
vvi_miC1038a-3p	0.223915	0	0	0.152267	0.24878	0.0932628	0	0	0
vvi_miC1038a-5p	0	0	0	0	0	0	0	0.0773703	0
vvi_miC1038b-3p	0.223915	0.0709149	0.156389	0.152267	0.165853	0.279788	0	0	0
vvi_miC1038b-5p	0	0	0	0	0	0	0	0	0.224712
vvi_miC1038c-3p	0	0.0709149	0	0.304534	0	0.279788	0	0.0773703	0
vvi_miC1038c-5p	0	0.0709149	0	0	0	0	0	0	0
vvi_miC1038d-3p	0.223915	0.14183	0.390972	0.304534	0.0829267	0.186526	0	0.0773703	0
vvi_miC1038d-5p	0	0	0.0781945	0	0	0	0	0	0
vvi_miC1038e-3p	0.0746385	0.212745	0.312778	0.456802	0.331707	0.0932628	0	0.0773703	0
vvi_miC1038f-3p	0.149277	0	0.547361	0.913603	0.331707	0.0932628	0.0796635	0.0773703	0
vvi_miC1038f-5p	0.0746385	0	0	0	0	0.0932628	0	0	0
vvi_miC1038g_V1-3p	0	0.28366	0.234583	0.609069	0.24878	0.186526	0	0.154741	0
vvi_miC1038g-3p	0	0.212745	0	0.152267	0.24878	0.186526	0	0	0
vvi_miC1038g-5p	0.0746385	0	0	0	0	0.0932628	0	0	0
vvi_miC1038h_V1-3p	0	0	0	0.2	0	0.1	0	0	0
vvi_miC1038h_V1-5p	0	0	0	0	0	0	0	0.1	0
vvi_miC1038h-3p	1.79132	0.992809	2.26764	2.89308	1.40975	2.61136	0.398318	0.386852	0.224712
vvi_miC1038h-5p	0	0	0	0.152267	0	0	0	0	0
vvi_miC1039-3p	117.182	79.7793	78.7419	98.3646	108.966	105.947	73.9277	96.094	82.4694
vvi_miC1039-5p	210.704	325.571	298.156	205.865	318.024	341.062	309.094	564.649	182.242
vvi_miC1042-3p	261.757	226.29	223.089	359.96	330.795	254.328	291.409	391.726	316.395
vvi_miC1042-5p	4.25439	5.10588	4.61348	3.95895	6.96584	7.46102	4.85947	10.0581	4.71896
vvi_miC1043-3p	0	0.14183	0.234583	0.609069	0.24878	0.466314	0.159327	0.309481	0
vvi_miC1043-5p	129.199	166.296	154.512	220.94	242.809	203.22	168.249	258.649	156.4
vvi_miC1044-3p	0	0	0	0	0	0	0.159327	0.0773703	0
vvi_miC1045-3p	0	0.0709149	0	0	0	0	0	0	0
vvi_miC1046-3p	0.671746	0.709149	0.781945	0.456802	0.414634	0.559577	0	0.309481	0.224712
vvi_miC1047_V1-3p	1.3	0.9	0.8	2	1	1.4	0.8	1.2	0.9
vvi_miC1047_V1-5p	0.8	1	0.5	0.5	1.8	0.7	0.4	0.4	0.4
vvi_miC1047_V2-5p	2.9	5.5	3.8	5.8	6	6.2	1.6	5.3	3.4
vvi_miC1047-3p	0.0746385	0	0	0.152267	0	0	0	0	0
vvi_miC1047-5p	5.52325	9.85718	6.17737	9.89737	9.03901	10.5387	2.38991	6.73122	4.26954
vvi_miC1048-5p	0	0	0.0781945	0	0.165853	0.0932628	0	0.0773703	0
vvi_miC1050a-3p	0	0.0709149	0	0	0	0	0	0.0773703	0
vvi_miC1050a-5p	3.73192	1.98562	2.58042	3.65441	0.99512	3.2642	2.23058	2.55322	1.34827
vvi_miC1050b-3p	0	0.0709149	0	0	0	0	0	0	0
vvi_miC1050b-5p	4.55295	1.63104	2.42403	4.41575	1.74146	2.89115	1.27462	2.70796	0.89885
vvi_miC1051-3p	0	0	0.156389	0	0	0	0	0	0
vvi_miC1051-5p	0	0.0709149	0	0	0	0	0	0	0
vvi_miC1052-3p	0	0	0	0	0	0	0	0.0773703	0
vvi_miC1053-5p	0.0746385	0	0	0	0.0829267	0.0932628	0	0.0773703	0
vvi_miC1054-5p	0.149277	0.0709149	0.0781945	0	0.0829267	0.0932628	0.0796635	0	0
vvi_miC1059_V1-3p	0	0	0.0781945	0	0	0	0	0	0
vvi_miC1059-3p	0	0.0709149	0	0	0	0	0	0.0773703	0
vvi_miC1063a-5p	0	0	0	0.152267	0	0	0	0	0
vvi_miC1063b-5p	0	0	0	0.152267	0	0	0	0	0
vvi_miC1067-3p	143.53	149.914	116.744	128.209	177.297	110.796	131.445	162.478	127.637
vvi_miC1067-5p	40.9765	75.6662	68.4984	44.1575	101.005	80.6723	38.4775	94.005	50.1109
vvi_miC1068-5p	0	0	0.0781945	0	0	0	0	0	0
vvi_miC1070-3p	0	0.0709149	0.156389	0	0	0	0.0796635	0	0
vvi_miC1071-3p	0	0.14183	0	0	0.0829267	0.0932628	0.159327	0	0
vvi_miC1071-5p	0.0746385	0.354575	0.547361	0.456802	0.165853	0.279788	0.637308	0.541592	0.449425
vvi_miC1072-5p	0	0	0	0.304534	0.24878	0.0932628	0.0796635	0.0773703	0
vvi_miC1074-3p	0	0	0	0	0	0	0.1	0	0
vvi_miC1075-3p	38.4	57.2	51.5	83.9	17.3	44.5	154.9	153	74.6
vvi_miC1075-5p	644.4	689.3	1665.2	724.8	633.2	1418.1	333.4	699.3	491.7
vvi_miC1076-5p	0.1	0.1	0.1	0.3	0.6	0	0	0.4	0
