# Supplementary material for: miRVIT: A Novel miRNA Database and Its Application to Uncover Vitis Responses to Flavescence dorée Infection
Source: Front Plant Sci. 2018 Jul 17;9:1034. doi: 10.3389/fpls.2018.01034 (PMC6057443; doi:10.3389/fpls.2018.01034)
Supplement: Supplementary file 10 [file Table_10.XLSX]

## Sheet: Table S10
Table S10. Normalised number of reads of putative ‘Barbera’-novel miRNAs in FDp infected (FD), recovered (R ) and healthy (H) plants. The asterisk denotes significant differences in the three comparisons FD/H, R/H and FD/R using the Student’s t-test (P ≤ 0.05).
										Significant differences
	H rep 1	H rep 2	H rep 3	R rep 1	R rep 2	R rep 3	FD rep 1	FD rep 2	FD rep 3	FD/H	R/H	FD/R
vvi_miC134_V1-3p	0.8	0.4	0.6	0.7	1.1	0.7	1.1	1.2	0.7
vvi_miC134b-3p	0.8	0.6	0.7	0.4	0.8	0.7	0.8	0.8	0.4
vvi_miC443_V1-3p	6.5	12.3	6.3	4.1	9.2	5.7	12.3	19.3	3.8
vvi_miC593_V1-3p	0.6	0.2	0.4	0.4	0.6	0.4	1.4	2.6	1.3
vvi_miC593_V1-5p	2	1	0.8	0.9	0.6	1.2	1.8	2.9	0.7
vvi_miC597-3p	2.4	3.4	2.4	1	1.3	2.2	2.7	3.5	3.1	*
vvi_miC605-3p	3.2	3.1	2.5	5.9	2.9	3.3	2.3	1.4	1.8			*
vvi_miC606-3p	0	1.8	1	1.6	1.6	1	0.8	0.5	0	*
vvi_miC614-5p	1.5	1.7	1	0.6	1.2	0.5	1.6	2.6	3.6
vvi_miC617-3p	8.1	3.4	5	4	4.1	3.2	9.9	10.8	11.9	*		*
vvi_miC620-3p	1.1	0.2	1	1	0.4	0.8	0.1	0.9	0.7
vvi_miC630-3p	1.8	2.6	1.4	0.4	2.8	0.3	7.1	16.3	2.5
vvi_miC631-3p	1.1	0.6	1.1	0.3	0.7	0.3	0.7	1	0.9
vvi_miC638-3p	4.4	9.5	8.5	12	8.7	2.4	4.5	3.7	5.4
vvi_miC644-3p	83.6	36.9	52.6	51.5	36	57.3	90.1	75.8	98.9	*
vvi_miC645-5p	1.2	0.3	0.7	1.3	0.6	1.1	1.5	1.6	1.1
vvi_miC648-5p	1.1	3.5	4.9	5.3	4.7	4.1	1	0.7	2	*
vvi_miC653-5p	2.4	3	1.3	1.6	1.3	1.3	1.4	3	1.6
